# Supplementary material
Source: publisher figshare collection journal article supplement (https://gsajournals.figshare.com/ndownloader/files/21211536)
Supplement: Supplementary file 1 [file 21211536]

## Sheet: Sheet1
Gene number	Gene symbol	Gene description or link to locus	male_testes	male_carcass	NBF_carcass	PBM_carcass_12hr	PBM_carcass_24hr	PBM_carcass_36hr	PBM_carcass_48hr	PBM_carcass_60hr	PBM_carcass_72hr	NBF_Ovaries	PBM_Ovaries_12hr	PBM_Ovaries_24hr	PBM_Ovaries_36hr	PBM_Ovaries_48hr	PBM_Ovaries_60hr	PBM_Ovaries_72hr	diapause_0_1_wk	diapause_1_2_wk	diapause_2_3_wk	diapause_3_4_wk	Embryo_0_1	Embryo_0_4	Embryo_4_8	Embryo_8_12	Embryo_12_16	Embryo_16_20	Embryo_20_24	Embryo_24_28	Embryo_28_32	Embryo_32_36	Embryo_36_40	Embryo_40_44	Embryo_44_48	Embryo_48_52	Embryo_52_56	Embryo_56_60	Embryo_60_64	Embryo_64_68	Embryo_68_72	1st_instar_larvae	2nd_instar_larvae	3rd_instar_larvae	4th_instar_larvae	pupae_male_early	pupae_female_early	pupae_male_late	pupae_female_late
gene25775	LOC109430117	cytosol aminopeptidase-like	5123.96	0.308096	0.0252379	0	0	0.0195744	0	0	0.0290147	0.0199282	0	0	0	0.0159679	0.0195381	0	0.0787592	0.535812	0.19785	0.101909	0.133301	0	0.101101	0.0873032	0.0247141	0	0.0637523	0.0651481	0.0481689	0.0711783	0	0	0.0432041	0.0447069	0.0225783	0.227468	0.0698114	2.54898	0.198996	0	0	0	0.0713981	94.6663	0	171.719	0
gene9374	LOC109420901	cytosol aminopeptidase	4248.71	0.287272	0	0	0.0174127	0.00912569	0	0	0	0	0.00960577	0	0	0	0	0	0.0856752	0.617922	0.149888	0.130654	0.145006	0	0.0282804	0.0101753	0	0	0.0297216	0	0.0336849	0.0331837	0.0223089	0.0220895	0	0.0104213	0	0.271008	0.141035	1.83374	0.0750134	0	0	0	0.133145	64.9044	0	137.499	0
gene4289	LOC109407273	uncharacterized LOC109407273	10563.2	0.578896	0	0	0	0	0	0	0	0	0.110612	0	0	0.0214306	0	0.0489238	0.140938	0.756964	0.331919	0.10258	0.268356	0	0	0	0	0	0.0285208	0	0	0.127372	0.160557	0.0635909	0.144961	0	0	0.440969	0.156157	4.18777	0.34338	0	0	0	0.383295	157.157	0.0332775	306.66	0
gene17114	LOC109420901	cytosol aminopeptidase	3461.13	0.0840852	0	0	0	0.00890372	0	0	0	0	0.00937211	0	0	0	0	0	0.0835912	0.295032	0.123743	0.0579436	0.101056	0	0.0459875	0.00992778	0	0	0.0289987	0.0197557	0.0109552	0.0323765	0	0.0107761	0	0.0101678	0	0.195438	0.0740944	1.36934	0.0214652	0	0	0	0.043302	54.164	0	109.107	0
gene21959	LOC109426050	uncharacterized LOC109426050	1408.89	0.129956	0	0	0	0	0	0	0	0.0168116	0.00869093	0	0.00732327	0	0	0.00768803	0.0442947	0.178427	0.0730222	0.0429857	0.0562269	0.0191006	0.0682321	0.0460311	0.0416981	0.0299265	0.0179273	0.0274798	0	0.0400311	0.0201843	0.00999286	0.00911184	0.0377151	0	0.127929	0.0687091	0.556122	0.143892	0	0	0	0.0200774	24.7458	0	50.7752	0
gene30722	LOC109398689	uncharacterized LOC109398689	7619.52	0.526041	0	0	0	0	0	0	0	0.0486076	0.0502563	0	0	0.0194739	0	0.0444569	0.128069	0.756635	0.120645	0.0932137	0.189664	0	0	0.053236	0	0.0576844	0.0259167	0	0	0.115742	0.145897	0.11557	0.237106	0.054523	0	0.215765	0.312178	3.05505	0.173349	0	0	0	0.348298	101.006	0.0302391	173.733	0
gene22061	LOC109426173	uncharacterized LOC109426173	11463.1	0.254804	0	0.0403507	0.0386117	0.0809429	0.255549	0	0.11998	0.206015	0.0426005	0	0.21538	0.165074	0.242379	0	0.43424	0.874601	0.460201	0.158028	0.367478	0.0468128	0.250841	0.270758	0.204392	0.440074	0.131812	0.76329	0.298777	0.294332	0.247344	0.146947	0.267982	0.323521	0.233411	0.888355	0.433019	5.27018	0.470213	0.111871	0.0502421	0.0470374	0.393654	130.409	0.256327	301.367	0.0603504
gene14762	LOC109418445	uncharacterized LOC109418445	8742.89	0.117049	0.0958811	0.111215	0.035474	0.0743651	0.156521	0	0.11023	0.189273	0.0391386	0	0.131918	0.0909954	0.0742273	0.207733	0.698166	0.803527	0.422804	0.0483954	0.67523	0.0430086	0.230457	0.165837	0.281674	0.314465	0.282568	0.288755	0.182998	0.0901377	0.318142	0.0450017	0.0820683	0.212307	0.385998	0.528106	0.397831	3.92361	0.648003	0.10278	0.0461592	0.043215	0.361664	97.7846	0.0470993	202.368	0.166338
gene22121	LOC109426232	tubulin alpha-4 chain	1199.7	0.0292622	0.0159802	0.0061786	0	0.0123942	0	0.0278273	0	0.0189273	0.0260924	0.0442389	0.0274829	0.050553	0.00618561	0.0230814	0.124672	0.133921	0.0626376	0.0564612	0.0562692	0.0143362	0.0704173	0.048369	0.117364	0.119796	0.107645	0.0962516	0.0304997	0.217833	0.212094	0.127505	0.109424	0.176923	0.171555	0.0640128	0.0736723	0.779157	0.0990005	0.025695	0.0846252	0.0216075	0.0753467	14.4224	0.00784989	36.2556	0
gene19802	LOC109423840	36.4 kDa proline-rich protein	3703.91	0.214774	0	0	0	0	0	0	0	0.0198457	0.0205188	0	0	0	0	0	0.078433	0.224671	0.0738864	0.0507435	0.110624	0	0	0	0.0246118	0.0235516	0	0	0	0	0	0	0	0	0	0.226526	0.11587	1.72875	0.0849306	0	0	0	0	41.0212	0	102.236	0
gene29335	LOC109397070	coagulation factor XII	2350.3	0.235693	0	0.0106641	0	0.0320881	0	0.0160098	0	0.0653361	0	0.0109079	0.0189739	0.00872532	0	0	0.143454	0.246554	0.0405416	0.0556861	0.0728394	0	0.0220979	0	0.027009	0.0258456	0	0.0118663	0.0131604	0.0259292	0	0	0.0236079	0	0.0370124	0.151916	0.0762939	0.756453	0.0776692	0.014783	0	0.0497253	0.0780279	43.3019	0	73.2022	0.0478493
gene20144	LOC109424249	DBF4-type zinc finger-containing protein 2 homolog%2C transcript variant X1	3313.03	0.0841762	0	0	0	0	0	0	0	0.0181489	0.0187645	0	0	0	0	0	0.0717271	0.256827	0.0675692	0.18562	0.101166	0	0.0368298	0	0.0675225	0.021538	0	0	0	0	0	0	0	0	0	0.207158	0.105964	1.46087	0.129449	0	0	0	0	34.8399	0	120.578	0
gene4290	LOC109407274	SH3 domain-containing protein C23A1.17-like	3107.75	0.140359	0	0	0	0	0	0	0	0.129695	0.0268189	0.0129916	0.0338977	0	0.076294	0.011862	0.307545	0.513893	0.0482861	0.0663237	0.260261	0.0294707	0.0394788	0.0426135	0.064337	0.0923486	0.055321	0.0565322	0.0156745	0	0	0.0308364	0.140589	0	0.058777	0.312527	0.0454341	1.38719	0.0925062	0.0352139	0	0.0148061	0.0929334	65.5543	0.161369	111.988	0.151973
gene21881	LOC109425977	cytosol aminopeptidase-like	1235.69	0.0572957	0	0.127027	0.0173646	0.0728039	0	0	0.0539577	0.0370599	0.0191585	0.0185615	0	0	0.0181672	0	0.097644	0.0786657	0.0459919	0.071069	0.0206579	0	0.037603	0	0.02298	0	0	0.0807693	0.0223946	0	0.0222473	0.0110142	0	0.020785	0	0.0940034	0.0865507	0.633396	0.0351563	0	0	0	0.0221295	22.8263	0.0230553	41.2092	0
gene6802	LOC109409932	trypsin-like	1989.59	0.353664	0	0.0172327	0	0.0172842	0	0.0776129	0	0.0175966	0	0.0176266	0.0306609	0.0140997	0	0	0.092726	0.174308	0.0218377	0.0224965	0.0784698	0	0.0357091	0	0.0872904	0	0	0.0191753	0.0212666	0.0838007	0	0	0	0	0	0.0892687	0.0821914	0.698508	0.0251019	0.0238886	0	0.0401768	0.0840594	39.619	0	63.1556	0
gene19950	LOC109424041	tubulin alpha-4 chain	1851.15	0.0437451	0	0.00923662	0	0	0.0584974	0.0416001	0.0274644	0.103749	0.0585098	0.330672	0.188992	0.362753	0.175695	0.103516	0.186378	0.120122	0.0936393	0.012058	0.147208	0.257181	0.239249	0.0723087	0.128665	0.179088	0.120692	0.102779	0.0455952	0.213355	0.29442	0.0784872	0.143135	0.137534	0.170976	0.143543	0.110136	0.811194	0.0941815	0.0896292	0.080506	0.0538364	0.0901109	22.0196	0.0117351	53.0551	0.055259
gene9126	LOC109412395	outer dense fiber protein 3	1891.09	0.0658864	0	0	0	0	0	0.125311	0	0.0213083	0.0881241	0.042689	0.148513	0.0341474	0.250694	0.15591	0.112284	0.241228	0.158663	0.108966	0.0475106	0.0968377	0.38917	0.0700117	0.0792767	0.126437	0.159057	0.116099	0.0257523	0.152215	0.102332	0.0506627	0.11549	0.382423	0.193135	0.324294	0.199056	0.869338	0.577535	0.0578547	0	0.21893	0.0254475	23.5882	0	37.4777	0
gene23295	LOC109427487	uncharacterized LOC109427487	1018.02	0.0456449	0	0	0	0	0	0	0	0	0	0	0	0	0	0	0.0777886	0	0.0366397	0	0.065829	0	0	0	0	0.0350372	0	0	0	0	0	0	0	0.0662339	0	0.0374441	0	0.260437	0	0	0	0.0337046	0	14.5457	0	28.8097	0
gene5611	LOC109408606	uncharacterized LOC109408606	616.559	0	0	0.0097291	0.0279295	0.0292747	0.0513469	0	0	0	0	0.0099515	0	0.0159206	0	0	0	0.0843513	0	0	0.022151	0	0	0.0217611	0.0246409	0.0353693	0.0635635	0.0649551	0.0600328	0.0591395	0.0596381	0.0590514	0.0969213	0.0780053	0.0562787	0.0629984	0.0812054	0.350541	0.127547	0	0	0	0.0118644	7.37201	0.0247216	19.5186	0
gene6742	LOC109409766	uncharacterized LOC109409766%2C transcript variant X1	619.731	0	0	0	0	0	0.0115411	0.0328296	0	0	0.0230871	0	0	0	0	0.0204229	0.0735418	0.126396	0.0415672	0.0570949	0.0248941	0	0	0	0	0.0132498	0.0238116	0	0.0269868	0	0	0	0	0	0	0	0	0.209286	0	0	0	0	0	6.27028	0	15.1642	0
gene23960	LOC109428263	paramyosin-like	548.36	0.025518	0	0	0	0	0	0.0242667	0	0.00825276	0	0	0.00718992	0	0	0	0.0217441	0.0233571	0	0.0211015	0	0.00937638	0.0334948	0.0271158	0.0307041	0.0293816	0.0264014	0.0359725	0.0199479	0	0.00990837	0	0	0	0.00935024	0.0209333	0.0481843	0.418597	0.0470908	0	0	0	0.0197118	7.41238	0	17.6383	0
gene18056	LOC109421942	uncharacterized LOC109421942	473.79	0	0	0.00940052	0.044977	0.028286	0.0496128	0	0.0838552	0	0	0.0288462	0	0	0	0	0	0.0271675	0.0238252	0	0	0	0	0.0210262	0.0714262	0.0797412	0.0204723	0.0627615	0.0348032	0.0799992	0.103723	0.0342343	0.135269	0.0107673	0.0108756	0.0121742	0.0560449	0.317534	0.123239	0	0	0	0.0343912	5.48825	0.07166	15.3639	0
gene33272	LOC109401355	outer dense fiber protein 3-like	1818.8	0.105966	0	0	0	0	0	0	0	0.159928	0.141731	0.0457715	0.179141	0.0366131	0.447993	0.0626878	0.180588	0.355639	0.0567066	0.116835	0.152824	0.051915	0.185454	0.075067	0.255003	0.0271133	0.0730893	0.124483	0.0276118	0.163206	0.164582	0	0.321956	0.153764	0.362392	0.376686	0.133393	0.780958	0.391097	0.124064	0	0.13041	0.027285	16.9768	0	43.9358	0.0669281
gene23657	LOC109427945	paramyosin-like	491.207	0.0267557	0	0	0	0	0	0.0508875	0	0.0259591	0	0	0.00753866	0	0	0	0.0227987	0.02449	0	0.022125	0	0.00983117	0.0351195	0.00947699	0.0107311	0.0308067	0.0276819	0.0377173	0	0	0.010389	0.0411471	0	0	0.00980376	0.0219487	0.07073	0.286239	0.0246874	0	0	0.0197567	0.0206679	6.91226	0	16.8462	0
gene22650	LOC109426717	centrosomal protein of 135 kDa-like	354.454	0.0271479	0	0.0257948	0.0164555	0.017248	0.0181515	0	0	0	0	0	0.0152983	0.0773858	0.0172161	0	0.0578324	0.0745471	0.010896	0.0448987	0.00978819	0.0199506	0	0	0	0.0208389	0	0	0.0212221	0	0.0210825	0.0208751	0	0	0.019895	0.0222704	0	0.154899	0	0	0	0	0.0419417	6.23034	0.0327723	9.96755	0
gene32303	LOC109400280	uncharacterized LOC109400280	468.673	0.0280133	0.0688417	0.0177447	0	0.0177978	0	0.079919	0.105525	0.0271793	0.0374682	0.0272255	0.0394649	0.0145186	0.0532945	0.0580029	0.0358054	0.166667	0.157406	0.150572	0	0	0.00919253	0	0	0.0322547	0.028983	0	0	0	0.0870181	0.140013	0.108028	0.0203246	0.0718518	0.137882	0	0.309683	0.0258478	0	0.0110473	0	0	8.80764	0	15.7405	0
gene6801	LOC109409931	calcium-binding protein P-like	1525.81	0.0508359	0	0	0	0	0	0	0	0.0986447	0	0	0	0	0	0	0	0.046531	0.0816131	0.0420375	0	0	0	0	0	0	0	0	0	0.0782961	0	0	0	0	0	0.125107	0	0.870168	0	0	0	0	0.157076	30.7446	0	48.6378	0.048162
gene14768	LOC109418450	arginine kinase	2892.92	1.32991	0.71098	0.3281	0.246077	0.400235	0.3744	0.678945	0.566891	0.516127	0.159154	0.0816324	0.134108	0.101576	0.124287	0.0662532	2.21087	1.61452	1.89909	1.51648	0.0908525	0.257192	0.128626	0.267761	0.101065	0.139695	0.0869021	0.157875	0.0875467	0.118586	0.54357	0.925743	1.59991	0.101568	1.8774	2.04414	2.16757	1.66739	1.96337	1.33989	0.41957	0.144719	0.118952	35.542	0.428116	80.4237	0.570298
gene17572	LOC109421383	abnormal long morphology protein 1-like	497.586	0	0	0	0	0	0	0.0901134	0	0.0122585	0.0760456	0	0.0106798	0.00982236	0.0240371	0.134541	0.0161491	0.0173471	0	0	0.10933	0.027855	0.0995051	0	0	0.0290952	0	0	0.0740756	0	0.0294354	0.0291459	0	0.0275006	0.041666	0	0.0286288	0.229787	0.0174869	0.0332833	0.0149477	0	0.131758	5.44296	0	14.9962	0
gene2275	LOC109423305	protein transport protein SEC31-like	519.113	0.0231175	0	0	0.00700623	0	0	0	0	0.0672878	0.03092	0.0224674	0.0521085	0.0119813	0.0366504	0.0888939	0.0393972	0.0740597	0.0371134	0	0.0666801	0.0169887	0.022758	0.0327533	0.0556316	0.0887255	0.0239178	0.00814715	0.0271071	0.035605	0	0.026664	0.00810438	0.0251588	0.00847066	0.0474103	0.0349213	0.14839	0.0319957	0	0	0.0170702	0.0446437	10.3	0	17.1712	0
gene17121	LOC109420897	nucleosome assembly protein 1-like 1	522.976	0	0	0	0	0	0	0	0	0	0	0	0	0	0	0	0.0671488	0.0480868	0.0210854	0	0	0	0	0	0	0	0	0	0	0	0	0	0	0	0	0.0430968	0	0.0749384	0	0	0	0	0	6.14891	0	18.3183	0
gene36331	LOC109404648	uncharacterized LOC109404648	645.26	0.0664777	0	0	0	0	0	0	0	0	0	0	0	0	0	0	0.0566461	0.121697	0	0	0	0.0488534	0	0	0	0	0	0	0.0519669	0	0	0	0	0	0	0.054534	0.0251053	0.308184	0	0	0.104864	0.0736317	0	8.10766	0	16.0671	0
gene24740	LOC109429278	keratin-associated protein 16-1-like	1052.75	0.112235	0	0	0	0	0.0375211	0	0	0	0	0.0363596	0.0632464	0.0872532	0.0711747	0.132793	0.0478181	0	0	0.0464051	0	0.0824797	0.0736597	0	0	0	0	0	0	0.0432154	0.0435797	0	0	0	0	0	0	0.600359	0	0	0	0	0	11.1493	0	24.3187	0.0531659
gene30731	LOC109398700	uncharacterized LOC109398700	1297.82	0.0721176	0.0590755	0	0.0655702	0.0687283	0.241095	0.377198	0.543329	0.163265	0.385834	0.467264	0.406396	0.149508	0.411605	0.44797	0	0.0660107	0.115779	0.119272	0.702054	0.609478	0.496972	0.153266	0.0578496	0.0830367	0.0994855	0.12708	0.169127	0.0833053	0.196018	0.221817	0.176978	0.13081	0.396377	0.325384	0.326822	0.694379	0.133085	0.158316	0.0284402	0.159757	0.111417	19.6717	0.174117	32.1405	0.239135
gene26429	LOC109430879	uncharacterized LOC109430879	649.902	0	0	0	0	0	0	0	0	0	0.0476985	0	0	0.110897	0.0904614	0	0	0.0652843	0	0	0	0	0	0	0	0	0	0	0	0	0	0	0	0	0	0.117019	0	0.305217	0	0.125259	0	0	0	6.96834	0	16.3052	0
gene19276	LOC109423303	uncharacterized LOC109423303	455.435	0.0258745	0	0	0	0.016439	0	0	0	0.0669445	0	0.0502938	0.0485539	0.0563227	0.0328171	0.114803	0.0220479	0.0947339	0	0.0427927	0.0373162	0.0380296	0.0169814	0	0	0	0.00892341	0	0	0.0199257	0	0.029844	0.0362837	0	0	0.0424516	0.0488575	0.110725	0.076398	0	0.0204077	0	0.219859	12.3173	0	16.1321	0.0122568
gene14760	LOC109418368	uncharacterized LOC109418368	2352.1	0.403298	0	0.0729899	0	0	0.154086	0	0	0.372658	0.423828	0.186646	0.357131	0.4479	1.38838	0.204502	0.0981865	0	0.18499	0.142928	0.664727	0.97381	0.415932	0.244885	0	0.176899	0.0397389	0	0	0.133103	0.178967	0	0.0403958	0	0	0.189051	0.0435158	1.27383	0.10632	0.0505907	0	0.0850855	0	20.041	0	43.8145	0
gene2347	LOC109423739	uncharacterized LOC109423739	939.34	0	0	0	0	0	0	0.0718805	0	0.097782	0.0505493	0	0.0425945	0	0	0.268297	0.064408	0	0	0	0.0545056	0	0	0	0.24253	0.0580208	0	0.0532771	0	0.0582085	0	0	0	0	0	0	0	0.323459	0	0	0	0	0	12.8863	0	25.6577	0
gene9365	LOC109412699	nucleosome assembly protein 1-like 1	458.784	0.0508857	0	0	0	0	0	0	0	0	0	0	0	0	0	0	0.02168	0.0465767	0.0204233	0	0	0	0.0333962	0	0	0	0	0	0	0	0	0	0	0	0	0.0417434	0	0.14517	0	0	0	0	0	5.62216	0	14.7271	0
gene30905	LOC109398807	keratin-associated protein 16-1-like	919.952	0	0	0	0	0	0.175809	0	0	0	0	0.10222	0.0592695	0.0817667	0.133398	0.186665	0.0448113	0	0.0844273	0.0434871	0	0.154587	0.138056	0	0	0	0	0	0	0.040498	0.0408394	0	0	0	0	0.086281	0	0.337565	0.0970471	0	0	0	0	9.75859	0	17.1225	0.0498228
gene30725	LOC109398675	SH3 domain-containing protein C23A1.17-like	466.889	0.0407646	0	0	0	0	0	0	0	0.0131837	0	0.0132061	0.0114858	0	0	0	0.0694716	0.0746253	0	0.0168547	0	0	0.0133769	0.043317	0.0163498	0	0	0	0	0	0	0	0.014291	0	0	0.0836017	0	0.247129	0	0	0	0	0	6.4819	0.0328066	14.3081	0.0965512
gene33255	LOC109401343	tubulin beta chain-like	276.55	0.0747155	0.0459027	0	0	0.0593367	0	0.035526	0	0	0.0874415	0.0968192	0.0105259	0.00968083	0.0592268	0.066301	0.079582	0.0512914	0	0.0617843	0.0269387	0.0823609	0.11033	0.0793937	0.0899003	0.14338	0.0644183	0.0921602	0.17522	0.158228	0.159562	0.0574518	0.11787	0.0542087	0.260082	0.0306459	0.268055	0.199831	0.0689398	0	0.132591	0.0551707	0.0288576	4.09885	0.0601297	8.34385	0.0176964
gene4390	LOC109407232	tubulin beta chain-like	3074.73	1.68495	0.742139	0.250363	0.153968	0.306629	0.430254	0.684414	0.462482	0.744829	0.50962	0.230412	0.151157	0.264703	0.227236	0.367261	1.03894	0.418506	0.715823	0.270825	0.280859	0.143114	0.294518	0.45994	0.73353	0.63486	0.334757	0.481499	0.582463	0.747761	0.33324	0.746647	0.738048	0.403484	0.817073	0.701533	0.912467	2.19211	0.822821	0.16119	0.300517	0.0167559	0.23546	69.6469	1.36284	111.622	1.30498
gene6403	LOC109409502	pre-mRNA-splicing factor CWC21-like	543.427	0	0	0	0.02245	0	0	0.0704429	0.0697596	0	0.0495383	0	0	0	0	0	0	0.0678024	0.0297305	0.0306273	0	0	0	0	0	0	0	0	0.028953	0.199655	0	0.0569593	0	0	0.0542848	0.212683	0	0.264158	0.0683489	0	0	0	0	6.31426	0	14.0547	0
gene8255	LOC109411518	uncharacterized LOC109411518	354.223	0.0149087	0	0	0	0	0	0	0	0.0578595	0.0697923	0	0	0.0231806	0.018909	0.0705584	0.0508153	0	0	0.0123284	0.0107507	0	0	0	0	0	0	0	0	0	0.00764136	0	0	0	0	0	0	0.116965	0	0	0	0	0	6.02515	0	11.311	0
gene5713	LOC109408708	testis-specific serine/threonine-protein kinase 6-like	282.354	0	0	0	0	0.0519208	0.109281	0	0	0	0	0	0	0.0211773	0	0	0.017409	0.0374008	0	0.033789	0	0	0.080451	0.0578925	0.0983306	0.141143	0.183194	0.0432011	0.0159709	0.062933	0	0	0	0	0	0	0.0617245	0.262285	0.0377023	0	0.0644555	0.42241	0.0631274	4.07248	0	9.41973	0
gene14927	LOC109418629	calmodulin-beta-like	574.187	0.0844504	0	0	0	0.0268272	0	0	0.0795304	0	0	0	0	0	0	0	0.0359804	0.115949	0.0338947	0.0349172	0	0	0.0554247	0	0	0	0	0	0	0.0650342	0	0.0324687	0.0296061	0	0	0	0.0318927	0.481852	0	0	0	0	0	4.45764	0	13.3907	0
gene21645	LOC109425621	uncharacterized LOC109425621	396.733	0.0250375	0	0	0	0	0	0	0	0.0728761	0.016744	0.0243334	0.0141091	0.0129763	0.0714496	0.0666531	0.0213346	0.0114586	0.0401957	0	0.072218	0	0.00821602	0.0354735	0.0200839	0.0768754	0.0259042	0.00882378	0.0293584	0.0385621	0	0.0288785	0.0263324	0.00908278	0.00917416	0.0924261	0.0189108	0.25	0.011551	0	0	0	0.00967028	7.01832	0	12.0834	0
gene16613	LOC109420325	dopamine N-acetyltransferase-like%2C transcript variant X2	374.009	0.0281807	0.0461688	0	0	0.0179042	0.0188421	0.0535979	0	0	0.0565383	0.0365177	0	0.0876326	0.017871	0.0166713	0.024013	0	0	0.0466068	0.0609634	0.0207096	0	0.0798539	0.316475	0.151422	0.0583126	0.0198631	0.0220294	0.0434033	0.0656537	0	0.0987941	0.0613384	0.0413036	0.0462354	0	0.301485	0	0.0742363	0	0	0.0217686	3.97281	0.0680381	7.57026	0
gene21096	LOC109425069	uncharacterized LOC109425069	354.668	0	0.0883522	0.0170803	0	0.0171314	0	0.0769267	0.0761805	0.0610438	0.0180327	0.00873538	0.0227924	0.013975	0.0683988	0.00797588	0.0344648	0.0617026	0.0216446	0.100339	0	0	0.00884835	0	0	0.010349	0.00929928	0.0190058	0	0	0.04188	0.114037	0.056718	0	0.128443	0.0442398	0	0.240393	0.07464	0	0.0106337	0	0	6.85125	0	12.1728	0.0255462
gene35446	LOC109403622	uncharacterized LOC109403622	374.744	0	0	0	0	0.00910048	0	0.0272431	0	0.0648548	0.191585	0.0556844	0.0807178	0.11878	0.145338	0.161003	0.073233	0.0524438	0.0229959	0.0355345	0.0413159	0.0526321	0.0564046	0.152208	0.12639	0.0769657	0.0197597	0.0100962	0.0223946	0.0551533	0.0556183	0.0110142	0.0200863	0.0935325	0.0209941	0.0470017	0.0540942	0.224753	0.0396499	0.0251556	0.0564876	0	0	6.54639	0	13.1533	0.054282
gene10871	LOC109414298	tubulin beta chain-like	2526.28	1.46829	0.657862	0.291251	0.127844	0.290268	0.354288	0.794577	0.443091	0.686316	0.564203	0.262799	0.324563	0.323732	0.379036	0.339194	0.880084	0.618665	0.698833	0.286302	0.28476	0.323826	0.477453	0.463642	0.650717	0.620696	0.473808	0.476406	0.591778	0.84135	0.503975	0.777719	0.820859	0.445423	0.826331	0.632192	0.800685	1.8417	0.743412	0.206573	0.287917	0.0599006	0.292512	51.3439	1.59295	84.1718	1.21952
gene7325	LOC109410514	uncharacterized LOC109410514	380.346	0	0	0	0	0	0	0	0	0	0.0203502	0.0197161	0.0342956	0.0315422	0.0578921	0.0360038	0	0.0557062	0	0	0.021943	0	0	0.0431136	0	0	0	0	0	0	0	0	0.106679	0	0	0	0	0.151922	0	0	0	0.0224698	0	3.67135	0	8.10419	0
gene32301	LOC109400282	uncharacterized LOC109400282	306.217	0.0249531	0	0	0	0	0.0333681	0	0	0	0	0.0161676	0	0	0	0	0	0	0	0	0.0179937	0	0	0	0	0	0	0	0	0	0	0.0191875	0.0349916	0	0.0548595	0.0818798	0	0.160173	0.0920967	0	0	0	0	5.89026	0	9.73791	0
gene21095	LOC109425068	uncharacterized LOC109425068	337.355	0.027699	0	0	0	0	0	0	0	0	0	0.0179467	0	0	0	0	0.047205	0	0	0.0916203	0.0199737	0	0	0.0392445	0	0	0	0.0780942	0	0	0.0860419	0.0638967	0.0971053	0	0.0811952	0.045445	0	0.0395108	0.0511156	0	0	0	0	7.11963	0	12.6857	0
gene30066	LOC109398006	uncharacterized LOC109398006	396.101	0.01876	0.0307347	0.0118833	0.0341136	0.0476755	0.0878025	0.0178401	0	0.0728058	0	0	0.0634295	0.0194457	0.0594839	0.0221963	0.271753	0.154542	0.0451765	0.0930788	0.0135278	0	0.0615607	0.0265795	0.0902906	0.0288005	0.0129396	0.0661145	0.14665	0.187809	0.0437058	0.0288506	0.118381	0.0680551	0.0274959	0.107726	0.0850164	0.267599	0.173098	0.0658924	0.0295926	0.0277051	0.0144914	4.80968	0.0603908	12.4039	0.0355465
gene29818	LOC109397709	uncharacterized LOC109397709	398.202	0	0	0	0	0	0	0	0	0	0	0.042962	0	0	0	0	0.0282506	0	0	0	0	0	0	0.0939458	0	0.050898	0.0457353	0	0.129585	0.102125	0	0	0	0	0	0.0271973	0.0500821	0.260104	0	0	0	0	0	4.26085	0	11.0753	0
gene37840	LOC109621929	chaperone protein DnaJ-like	352.776	0	0.0501677	0	0	0	0	0	0.0192251	0.0528177	0.0136523	0.0529075	0	0	0	0.0362306	0	0.0373714	0.0163869	0.0337624	0.0441624	0	0	0.0144617	0	0	0.0422422	0.014389	0.0159583	0.0314417	0	0	0	0.0148114	0.0284247	0	0.0539664	0.0291198	0.0565089	0	0	0.0452226	0.0157694	5.76927	0	10.0566	0
gene14350	LOC109417990	chaperone protein DnaJ-like	339.061	0	0.0166049	0	0	0	0	0	0.0190898	0.052446	0.0406687	0.0525352	0	0	0.0257097	0.0119919	0	0.0371084	0.0162716	0	0.0438517	0	0.0266073	0.0430799	0	0.0311198	0.0419449	0.0714388	0.015846	0.0312205	0	0	0	0.0441214	0.0148551	0.0332576	0.0765524	0.0578297	0.0187038	0	0.0959274	0.0449044	0.0156584	4.63876	0	9.26807	0
gene20159	LOC109424252	uncharacterized LOC109424252	481.539	0	0	0	0	0	0	0	0	0	0	0	0	0.0224324	0	0	0	0.0396174	0.0347435	0.0357916	0.0624222	0	0.0852189	0	0	0	0.029854	0	0	0	0	0	0	0	0	0	0	0.12348	0	0	0	0	0	4.03004	0	9.96134	0
gene21597	LOC109425615	cytochrome c oxidase subunit NDUFA4	889.999	0	0	0	0	0.101678	0	0.152191	0	0	0	0	0	0	0	0	0	0.292973	0	0	0.115404	0	0	0.113373	0	0	0	0	0	0.123244	0	0.153825	0	0	0.117282	0	0	0.798997	0.147667	0.562119	0	0.236349	0	8.26386	0	12.4417	0
gene9114	LOC109412375	tubulin beta chain-like	204.294	0.0187193	0	0	0	0.0356791	0	0	0	0	0.0125187	0.0242572	0	0.0097018	0	0.0110741	0.0159509	0.0171342	0	0	0	0	0.0368564	0	0	0	0	0.0131943	0.0292665	0	0	0	0	0	0	0	0	0.186913	0	0	0.0147643	0	0.01446	3.28142	0	6.91126	0.0177348
gene14228	LOC109417623	uncharacterized LOC109417623	346.163	0	0	0	0	0	0	0	0	0	0	0	0	0	0	0	0	0	0	0	0.0459912	0	0	0	0	0	0	0	0	0	0	0	0	0	0	0	0	0.295675	0.058849	0	0	0	0	6.23122	0	9.59753	0
gene22066	LOC109426179	arginine kinase-like	1763.23	0.633601	0.476936	0.206098	0.176456	0.271993	0.366388	0.439687	0.241901	0.542742	0.148877	0.0998568	0.144748	0.0887516	0.0434382	0.101305	1.24993	1.25394	0.934723	1.17533	0.135832	0.390117	0.179819	0.157704	0.151101	0.144592	0.16536	0.193121	0.160637	0.14506	0.478743	0.447699	1.32074	0.074546	0.966298	1.65763	1.177	1.11142	1.26405	0.736806	0.378176	0.101158	0.19842	21.8282	0.192939	53.0183	0.438039
gene34049	LOC109402131	cytochrome c oxidase subunit 5A%2C mitochondrial-like	545.528	0	0	0	0	0	0	0	0	0	0	0	0	0	0	0.0309226	0	0	0.0419583	0.0864482	0	0	0	0	0	0	0	0	0	0	0	0	0	0	0	0.0428796	0	0.335523	0	0	0	0	0	6.40925	0.0841331	13.3576	0
gene9098	LOC109412377	PERQ amino acid-rich with GYF domain-containing protein 2-like	242.718	0	0	0	0	0	0	0	0	0	0	0	0	0	0	0	0.0198134	0	0	0	0.0335344	0	0	0.0823606	0	0	0	0	0	0.0358126	0.0361145	0.089398	0.0489097	0	0	0	0	0.182423	0	0	0	0	0	4.93989	0.0561391	7.05171	0
gene10557	LOC109413986	uncharacterized LOC109413986	436.148	0.0422941	0	0	0	0	0	0	0	0	0	0.0274031	0	0	0.0268211	0	0.0720782	0.15485	0.1358	0	0.0304983	0.0621625	0	0	0	0	0	0	0	0	0	0	0	0.0306859	0	0	0	0.180989	0.0780493	0.22283	0.0667162	0.0312304	0.0326707	4.57584	0.13615	7.58523	0
gene10768	LOC109414176	cilia- and flagella-associated protein 157	249.44	0.162039	0.154858	0.034214	0.0491093	0.085791	0.126399	0.154094	0.254332	0.052405	0.0361217	0.0174981	0	0	0.0171264	0.0319534	0.345187	0.0494392	0.130071	0.0446649	0	0.0198467	0.230417	0.0191317	0.0649904	0.0207303	0.0186276	0	0.0422231	0.0207974	0.943773	1.49518	1.81781	0	1.32602	1.17419	0.713931	0.982338	0.498377	0.0711431	0.0639016	0.0797676	0.0834465	7.26039	0.978048	8.52287	0.12793
gene24150	LOC109428529	uncharacterized LOC109428529	489.429	0	0.0571673	0	0	0	0	0	0	0.0451403	0.0466714	0	0	0	0	0	0	0.0638784	0	0	0	0.0512862	0.0916037	0.148316	0.223924	0	0.144408	0.0983798	0	0.053743	0	0.0536629	0.0489317	0.101267	0	0	0	0.199096	0.0643933	0	0	0	0	7.09284	0	14.1277	0
gene22315	LOC109426306	cytochrome c oxidase subunit 5A%2C mitochondrial-like	564.957	0	0	0	0	0	0	0	0	0	0	0	0	0	0	0.0333427	0	0	0.045242	0	0	0	0	0	0	0	0	0	0	0	0	0	0.0790353	0	0	0.0462354	0.0851396	0.120594	0	0	0	0	0	7.7978	0	14.403	0
gene28692	LOC109433164	potassium/sodium hyperpolarization-activated cyclic nucleotide-gated channel 4-like	135.297	0	0	0	0	0	0.00904263	0.0385837	0	0	0	0.00876272	0	0	0	0	0.0115242	0	0	0.0447348	0	0	0.00887605	0.0383232	0.0108487	0.0311442	0	0	0	0.0833198	0	0.0207989	0	0	0	0.0221891	0	0.0771667	0.0249579	0	0	0.0499328	0	2.28794	0	4.56999	0
gene20316	LOC109623118	testis-specific serine/threonine-protein kinase 3-like	313.296	0.0448552	0	0	0	0	0	0	0	0.0290132	0	0	0	0	0	0	0	0.0410568	0	0	0.032345	0	0	0	0	0	0	0	0	0	0	0	0	0.032544	0	0.0367963	0	0.0639829	0	0	0	0	0	3.82352	0	10.5649	0
gene20780	LOC109424782	NADP-dependent malic enzyme-like	136.426	0.150496	0.145694	0.216659	0.124393	0.0782305	0.146362	0.130106	0.167497	0	0.0274487	0.0177289	0.0462583	0.0212723	0	0	0	0.0876601	0.0878579	0.0791947	0.00986566	0	0	0	0	0	0	0	0	0	0.0212494	0.0210404	0	0	0	0.0448934	0.0723349	0.0487891	0.0378714	0.108123	0.0431631	0.020205	0.0634105	2.12611	0.0880845	4.51774	0.362931
gene12747	LOC109416228	uncharacterized LOC109416228	468.866	0	0	0	0	0	0	0	0	0.0450796	0	0.0451563	0.019637	0	0.0662958	0.0412302	0	0	0	0	0	0	0	0	0	0	0	0	0	0	0	0	0	0	0	0	0	0.173975	0.0643067	0	0	0	0	8.61422	0	15.9058	0
gene24547	LOC109428915	testis-specific serine/threonine-protein kinase 6-like	212.824	0	0	0	0	0.042563	0	0	0	0	0	0	0	0.0231473	0	0	0	0	0.0358507	0	0	0	0.0293116	0.0632779	0.0358259	0.0685655	0.0462081	0.0472198	0.0174566	0.0343936	0	0	0.0313146	0.0324038	0	0.0366378	0.0674663	0.0637074	0	0	0	0.428725	0.0344998	2.95778	0	7.0989	0
gene23211	LOC109427457	uncharacterized LOC109427457	234.3	0	0	0	0	0	0	0	0	0	0	0	0	0	0	0.0294671	0	0.0455924	0	0	0	0	0.0163452	0	0	0	0	0	0	0	0	0	0	0	0	0.0204306	0	0.0710512	0	0	0	0	0.0384768	1.61671	0	7.01623	0
gene35599	LOC109403864	glutamate dehydrogenase%2C mitochondrial	264.111	0.0621361	0.0254496	0	0	0	0.0207726	0	0	0.0502385	0.0519425	0	0.0175074	0.00805092	0.019702	0	0	0.0853116	0	0	0	0	0	0	0	0.0476959	0	0	0	0	0	0	0	0.0338114	0	0	0.0117328	0.0997121	0.0143332	0	0.0490078	0	0	5.47991	0	9.9481	0.0441509
gene36872	LOC109405273	calmodulin-beta-like	656.8	0.0935967	0	0	0	0.0297326	0	0	0.0881438	0.12108	0	0	0	0	0	0	0.0398772	0.0428354	0.112697	0.0386988	0.0674925	0	0.0614274	0	0	0	0.0645578	0	0	0	0	0.0359851	0.0328125	0	0	0	0.0353468	0.734302	0	0	0	0	0	5.1859	0	15.7054	0
gene33063	LOC109401113	uncharacterized LOC109401113	462.968	0	0	0	0	0	0	0	0	0	0	0	0	0	0	0	0	0	0	0	0	0	0.0660791	0	0	0	0	0	0	0	0	0	0	0	0	0	0	0.323145	0	0	0	0	0	4.29125	0	8.29239	0
gene20788	LOC109424785	leucine-rich repeat-containing protein 74A-like	291.46	0.0596007	0	0	0	0	0	0	0	0.0771016	0.0398584	0.0289623	0.016793	0.177615	0.0850415	0.0528884	0.0126965	0	0	0.0246427	0.021489	0.0218998	0.0195579	0	0.0358568	0	0	0.0420093	0.0232955	0.0114744	0.0347135	0	0	0	0	0.0488926	0	0.116898	0.0274967	0	0	0	0	2.41321	0	11.9621	0
gene37013	LOC109405408	parkin coregulated gene protein homolog	437.169	0	0	0	0	0	0	0	0	0.0227539	0.16468	0.113963	0.118941	0.018232	0.0522019	0.0832435	0.0299755	0.0321992	0	0.0581795	0.126835	0.0258518	0.0461747	0.049841	0	0	0	0	0	0	0	0	0	0	0	0	0	0.175627	0.0649175	0.0617797	0	0	0.0543478	4.79781	0.0566215	10.5964	0
gene2230	LOC109423351	cilia- and flagella-associated protein 20-like	252.039	0	0	0	0	0	0	0	0	0	0	0	0	0.015047	0	0	0	0	0	0	0	0	0	0	0	0	0	0	0	0	0	0	0	0	0	0	0.0438569	0.103533	0	0	0	0	0	3.80738	0	5.8773	0
gene8546	LOC109411767	uncharacterized LOC109411767	241.111	0	0.0321783	0	0	0.0873508	0.118191	0.112068	0.221962	0.0127042	0.0525406	0	0.0221362	0.0305386	0.0124556	0.0348582	0.0669453	0.0539337	0.0630646	0.0974506	0.0283264	0.0144339	0.0128904	0.0139139	0	0	0.0270947	0.027688	0.0614154	0.0151254	0.0915173	0.0302057	0.0275426	0.0712516	0	0.145011	0.0445048	0.196117	0.181228	0	0.0619652	0.072516	0.0303442	5.22439	0.0158068	7.7405	0.167472
gene15169	LOC109418928	uncharacterized LOC109418928	326.608	0	0	0.0159289	0	0	0	0	0.0236817	0.0650615	0.11772	0	0.0850238	0.013033	0	0.0595058	0	0	0	0.103973	0.0543999	0.0554398	0	0.0356283	0.0605148	0.154422	0.0693793	0.0708983	0	0.0580956	0	0	0.0176315	0	0	0	0.11396	0.179351	0.0928113	0.110406	0.0198337	0	0	4.20464	0	9.19408	0
gene33168	LOC109401298	uncharacterized LOC109401298	248.917	0	0	0	0	0	0	0	0	0.0270042	0.293161	0.202876	0.0941058	0.18392	0.0529512	0.234634	0	0.019107	0	0	0	0.138064	0	0	0	0	0	0	0	0	0	0	0	0	0	0.0342484	0	0.0297763	0	0	0	0	0	4.11995	0	7.16616	0
gene27743	LOC109432260	dynactin subunit 1-like	115.737	0.0138717	0	0	0	0	0	0	0	0	0	0.0179755	0	0	0.0175937	0	0	0	0	0	0	0	0.036416	0	0.0222546	0	0	0	0	0	0	0	0	0	0	0	0	0.0989356	0	0.0121807	0	0	0	2.06473	0	3.50217	0
gene25015	LOC109429527	uncharacterized LOC109429527	633.877	0.0414158	0.0678519	0	0.0502076	0.105252	0.0553825	0	0.0780059	0.133943	0.138486	0	0.116693	0.128789	0.0525283	0.171507	0.0352907	0	0.166225	0.171239	0.0895947	0.0608716	0.407717	0.0880179	0.0664439	0.254328	0.085699	0.145959	0.129502	0.0637876	0	0.0636925	0.174231	0.240389	0.0910528	0.0679497	0.0625626	0.443077	0.0764285	0.181836	0	0	0	7.30509	0.0333307	14.2497	0.0392374
gene23316	LOC109427550	uncharacterized LOC109427550	188.281	0	0	0	0	0	0	0	0	0.0210145	0	0	0	0	0	0	0	0.0297379	0	0	0.0117139	0	0.0106613	0	0	0	0	0	0	0	0	0	0	0	0	0	0	0.104273	0	0	0	0	0	2.29371	0	5.96429	0
gene5077	LOC109427550	uncharacterized LOC109427550	294.717	0	0	0	0	0.0273165	0	0	0.0269937	0.0834309	0.172521	0.0928586	0.0807624	0.0297114	0.109064	0.110221	0.097698	0.0524728	0.0460173	0.0355541	0	0.0526612	0.150495	0.131986	0.103467	0.0330035	0.0593118	0.0505087	0	0.0551838	0.055649	0.033061	0	0.0311947	0.0210057	0.0235138	0.0324745	0.204434	0.0132239	0	0.0113038	0	0	5.15919	0	8.96861	0
gene29101	LOC109433571	myosin-11-like	93.0508	0.0163779	0	0	0	0	0	0	0	0.0127123	0.00547644	0	0.00461463	0.00848831	0.0051931	0	0.0046054	0.0149911	0.0131468	0.00677168	0	0	0.00537441	0.0676413	0	0	0.00282415	0.0230879	0	0	0	0	0	0	0.00600116	0.00671771	0	0.023362	0.0151119	0	0	0	0	1.81147	0	2.81035	0
gene2579	LOC109426465	superoxide dismutase [Mn]%2C mitochondrial	276.943	0	0	0	0	0	0	0	0	0	0	0	0	0.0370165	0	0	0	0.0326871	0	0	0	0	0	0	0	0.0548241	0.0246316	0.0251709	0	0	0	0	0	0	0	0	0	0.0509396	0.0659011	0	0	0	0	4.19145	0	5.01209	0
gene2718	LOC109428246	uncharacterized LOC109428246	570.443	0.0956689	0	0	0	0	0	0	0	0.123761	0	0	0	0	0	0	0.0815202	0.262703	0	0	0.0689868	0	0	0.271091	0.153483	0.660923	0	0	0	0	0	0	0.0670779	0	0.210329	0.156961	0.722587	0.0682327	0	0	0.0754558	0.141286	0	3.95202	0	11.4139	0.725096
gene4295	LOC109406740	uncharacterized LOC109406740	878.077	0	0.152423	0.0392888	0.0563935	0.0197032	0.0829413	0.206442	0.116822	0.30089	0.207397	0.160748	0.104856	0.225021	0.314667	0.275197	0	0.113545	0	0.10258	0.424896	0.387438	0.223887	0.0878775	0.0995068	0.0714155	0	0.0655767	0.145457	0.119411	0.0722505	0.14308	0.195697	0.202505	0.29545	0.0763215	0.234236	0.72991	0.17169	0.190623	0.02446	0.0915992	0.0958237	13.909	0.0998326	24.8256	0.26443
gene12712	LOC109416198	PERQ amino acid-rich with GYF domain-containing protein 2-like	172.356	0	0	0	0	0	0	0	0	0	0	0	0	0	0	0	0.0194814	0.0418533	0	0	0.0329726	0	0	0.0161961	0	0	0	0	0	0	0	0.01758	0.0480903	0	0	0	0	0.0815303	0	0	0	0	0.0353213	3.77776	0.0183995	5.8073	0
gene37741	LOC109406200	glutamate dehydrogenase%2C mitochondrial-like	307.599	0.0315213	0	0	0	0	0	0	0	0.0917486	0.0737805	0	0	0.00816839	0	0	0.0805786	0.0288521	0.0253025	0.0781975	0	0	0	0	0	0	0	0	0	0	0	0.048476	0	0.0114349	0	0	0.0595201	0.14613	0.0145423	0	0	0.0465513	0	5.89056	0	11.1123	0.0149317
gene20603	LOC109424589	uncharacterized LOC109424589	459.062	0	0	0	0	0	0	0	0	0.101634	0	0	0.0221362	0	0.0747334	0.0929553	0	0.143823	0	0.0649671	0	0	0	0	0	0	0	0	0.0614154	0	0	0.0604114	0	0.0570013	0	0	0	0.420251	0	0	0	0	0	6.00149	0	18.8675	0
gene19368	LOC109423381	cytochrome c	600.361	0	0	0	0	0	0	0.0535979	0	0.0364557	0	0	0	0	0	0.0666853	0	0	0	0.0932137	0	0	0	0.0798539	0.0904214	0.12979	0	0	0.0881177	0	0	0.0866772	0	0	0.0826073	0.0924707	0	0	0.312028	0	0.355626	0	0	5.69128	0	10.889	0
gene29256	LOC109397028	titin-like	100.562	0.0408932	0	0.0172689	0	0	0.0364558	0	0	0	0	0	0	0	0	0	0	0	0	0	0	0	0.0357842	0	0	0	0	0	0	0	0	0	0	0	0	0.0223641	0	0.116663	0	0.0359082	0	0	0	2.02891	0	3.65125	0
gene23071	LOC109427310	uncharacterized LOC109427310	941.244	0.114718	0	0.0726669	0	0	0.0383512	0	0.108035	0.259706	0.115078	0	0.193937	0.118911	0.0727493	0.135731	1.31965	0	0.138128	0	0.165446	0.252913	0.0752893	0	0	0.264174	0.0395631	0	0.0896773	0	0.133632	0	0.28152	0	0.336277	0.0470537	0.173293	0.204547	0.10585	0	0.0904802	0.254127	0	8.87607	0.138485	20.0884	0
gene13332	LOC109416864	cytochrome c oxidase subunit NDUFA4	358.991	0	0.0402228	0	0	0.0935902	0.0328309	0	0.231211	0	0.0985137	0.0636293	0	0	0.0622778	0.0290485	0	0	0	0	0.070816	0	0	0	0.0393881	0	0	0.0346099	0.191923	0.151254	0	0.0188786	0	0	0	0	0.0741746	0.175105	0	0	0	0	0	2.55965	0	7.4835	0
gene13298	LOC109416828	radial spoke head protein 9 homolog	217.524	0	0	0	0	0	0	0	0	0	0.041135	0	0	0	0	0	0	0	0	0	0	0	0	0	0.0246701	0	0	0	0	0	0	0	0	0	0	0	0	0.131609	0	0	0	0	0	2.82324	0	4.73452	0
gene33569	LOC109401638	dopamine N-acetyltransferase-like	197.973	0.0286478	0	0	0	0.018201	0.0191544	0.0544862	0.0539577	0	0.0191585	0	0	0.089085	0.0181672	0.0169477	0.024411	0	0	0.0473793	0.0206579	0.0210528	0	0.0811775	0.18384	0.0659706	0.0592791	0.0201923	0.0223946	0	0.0667419	0	0.060259	0.020785	0.0419882	0.0470017	0	0.0612963	0.0528665	0.0754668	0	0	0.0221295	2.38563	0.0230553	4.82913	0
gene21612	LOC109425631	protein KHNYN-like	231.698	0	0	0	0	0	0	0	0	0	0	0	0	0	0	0	0.200316	0	0	0.111084	0	0	0	0	0	0	0.0231639	0.023671	0	0	0	0	0.0235468	0	0	0.0550991	0.0253654	0.0718565	0.0309872	0	0	0	0	2.5544	0	5.40259	0
gene27720	LOC109432285	cytochrome c oxidase subunit 6A%2C mitochondrial-like	490.775	0	0	0.183494	0	0.230054	0	0.0688688	0.272803	0	0	0	0	0.075067	0	0	0	0	0	0	0	0	0	0	0	0	0	0	0	0	0	0.0556865	0	0	0	0	0	0.154953	0	0	0	0	0.223767	7.12288	0	11.1486	0
gene3003	LOC109430806	myosin-11-like	80.2786	0.0164925	0	0	0	0.0104783	0	0	0	0.0128012	0.00551476	0	0.00464692	0.0085477	0.00522944	0	0.00463763	0.0150959	0	0.0204572	0	0	0.00541202	0.0330642	0	0	0.00284391	0.0290618	0	0	0	0	0	0	0	0.00676472	0	0.0411697	0	0	0	0	0	1.86199	0	2.53804	0
gene1202	LOC109411750	uncharacterized LOC109411750	508.276	0	0	0	0	0	0.0337909	0	0	0.179791	0.270385	0.0327449	0.170876	0.248833	0.0320494	0.0448469	0.0645964	0	0.0405679	0	0.182217	0.03714	0.0995051	0.17901	0	0.0387936	0	0	0.039507	0	0.0392472	0.0388611	0	0.0366675	0	0.0207293	0	0.036045	0	0	0	0	0.0780786	6.42883	0	15.4241	0.0478804
gene28052	LOC109432630	uncharacterized LOC109432630	381.706	0	0.0652463	0	0.0241398	0	0	0	0	0.0515195	0	0	0	0	0.101022	0	0	0.0729058	0.0319682	0.0987979	0	0	0	0	0	0	0.0549386	0	0.0311322	0.030669	0.061855	0	0	0	0	0.0980104	0.0601601	0.284041	0	0	0	0	0	3.76036	0	8.21537	0
gene18633	LOC109422522	uncharacterized LOC109422522	159.881	0	0	0	0	0	0	0	0	0	0	0	0	0	0	0.0288844	0	0	0	0	0	0	0	0	0	0	0	0	0	0	0	0	0	0	0	0	0	0.104469	0	0	0	0	0	2.48116	0	5.03597	0
gene3600	LOC109621878	uncharacterized LOC109621878	221.481	0	0	0	0	0	0	0	0	0	0	0	0	0	0	0.0404153	0	0.125064	0	0	0	0	0	0.0241982	0	0	0	0	0	0	0	0.0525316	0	0	0	0	0	0.146174	0	0	0	0	0	2.41896	0	6.24026	0
gene20511	LOC109422407	bax inhibitor 1-like	198.351	0	0	0.0389626	0	0	0	0	0	0	0	0	0	0	0	0	0	0.0563009	0	0	0	0	0	0	0	0	0	0	0	0	0	0	0	0	0.0901527	0	0.0464581	0.131609	0	0	0	0	0	2.05693	0	3.57456	0
gene12060	LOC109415480	uncharacterized LOC109415480	769.408	0.0391045	0.0640653	0	0	0.0496889	0.104584	0	0	0.278229	0.392272	0.0506731	0.0220361	0.0810678	0.0991937	0.115668	0.166606	0	0.0941689	0.0970097	0.0845947	0.0574745	0.230978	0.13851	0.0627358	0.180101	0.188805	0.137813	0.122275	0.120456	0.0607355	0	0.27418	0.283717	0.0859714	0	0.0590712	0.52991	0.0721632	0.171688	0.0616848	0.0577503	0	9.97432	0.157353	16.7052	0.111143
gene17385	LOC109421250	tetratricopeptide repeat protein 25-like	141.944	0	0	0	0	0	0	0	0	0.00976681	0	0	0	0	0	0	0	0	0	0	0.0217769	0	0	0	0	0	0	0	0	0	0	0	0	0	0	0	0	0.0969246	0.027865	0	0	0	0	2.20791	0	3.80059	0
gene28958	LOC109621484	probable flavin-containing monoamine oxidase C	236.239	0	0	0	0	0	0	0	0	0.0840055	0	0	0	0	0	0	0	0.0891578	0	0.0268493	0	0	0	0.0230011	0	0.0249231	0	0	0	0	0	0.0249665	0	0	0	0	0.0245236	0.092629	0	0	0	0	0	2.53349	0	6.72281	0
gene30889	LOC109398773	protein KHNYN-like	228.043	0.0374117	0	0	0	0	0	0	0	0	0	0	0.0210821	0	0	0	0	0	0	0	0.0539551	0	0	0	0	0	0	0	0	0	0	0.0287673	0	0	0	0	0.028257	0	0	0	0	0	0.0577984	3.16449	0	6.33523	0
gene15733	LOC109419525	dynein assembly factor 1%2C axonemal homolog	72.5806	5.06808	0.594532	0.317553	0.163273	0.48964	0.640359	0.647505	0.972406	0.0193589	0.0150116	0	0	0.0232675	0.0189799	0.0177058	0.624823	0.301344	0.480492	0.309367	0	0	0.00491064	0.0106011	0	0.00574347	0.0103218	0.0421912	0.00584908	0.0403344	0.325395	0.494798	0.34625	0	0.707347	0.441938	0.344735	0.458941	0.38662	0.203677	0.00590145	0.0221001	0.0288992	2.78671	0.234844	3.32888	0.212663
gene16888	LOC109420696	protein CROWDED NUCLEI 2-like	102.642	0	0	0	0.0142928	0	0.007883	0	0	0.015252	0.0315387	0.0305559	0.00664389	0.0427735	0.0373837	0.0139496	0.150696	0.0431666	0.018928	0.038998	0.0255054	0.0173286	0.0154756	0	0.00945745	0.0181002	0	0.0166203	0.018433	0	0	0.00906583	0.0247996	0	0	0	0	0.0336354	0	0.0207056	0	0	0	2.62073	0	3.85235	0.0223398
gene34984	LOC109403145	uncharacterized LOC109403145	146.316	0	0	0	0	0	0	0	0	0.0109035	0	0	0	0.00873667	0	0	0	0	0	0.0139396	0	0	0	0	0.0135221	0	0	0	0.0131775	0.0519259	0	0.0129621	0	0	0	0	0.0254644	0	0.0622162	0	0	0	0	3.3823	0	4.96953	0
gene4847	LOC109407778	uncharacterized LOC109407778	196.968	0	0	0	0	0	0	0	0	0	0.0230258	0	0	0	0.0436689	0	0	0	0.0552758	0	0	0	0.0451936	0	0	0	0.0474967	0.0485367	0	0.0530292	0.0534763	0.0264751	0.0482819	0.0499613	0	0	0	0.122783	0	0	0	0	0	1.17397	0	3.18024	0
gene25599	LOC109429939	IQ domain-containing protein G-like	153.801	0	0	0	0	0	0	0	0	0	0	0	0	0	0	0	0	0	0	0	0.0777357	0	0	0	0.0216184	0	0	0	0	0	0	0	0	0	0	0	0	0.0961074	0	0	0	0	0	2.70373	0	6.61742	0
gene15201	LOC109418940	uncharacterized LOC109418940	250.067	0	0	0	0	0	0	0	0	0.0700924	0.0905873	0	0	0	0	0	0	0	0	0	0	0	0.0355598	0.191916	0	0.0831813	0	0	0.127066	0.0834504	0	0.0208315	0.0379898	0.0589669	0	0	0.0409239	0.173897	0	0	0	0	0.041854	2.39811	0	5.1089	0
gene33314	LOC109401398	testicular haploid expressed gene protein-like	324.923	0.269555	0.100367	0.0465673	0.029707	0.311378	0.14746	0.302944	0.0692321	0.110952	0.163879	0.158772	0.055236	0.0889026	0.0466201	0.130471	0.751711	0.179439	0.531102	1.27662	0.0530116	0.0360167	1.36702	0.0347191	0.0393137	0.0376203	0.0507066	0.0172723	0.172404	0.075484	0.0190301	0.0188429	0.0859079	0.177792	0	0.100512	0.0555258	0.209728	0.0678321	0.0430356	0.0193275	0.0542842	0.075717	5.15783	0.0197212	9.44986	0.162513
gene30400	LOC109398277	uncharacterized LOC109398277	168.707	0.0733417	0.0450587	0.0580718	0	0.0116491	0.0980748	0.174364	0.0690689	0.0355791	0.159405	0.0593993	0.0206647	0.00950282	0.0465102	0.021694	0.0624949	0.0335655	0	0.0151621	0.0661083	0.0404232	0.0601675	0	0.0735394	0.0140743	0.0126468	0	0	0	0.0284778	0.0140988	0	0	0	0.0150412	0.0138487	0.104617	0.0845902	0.112702	0.0144615	0	0.028327	3.45048	0.0442681	5.87107	0.017371
gene21913	LOC109425894	uncharacterized LOC109425894	140.75	0	0	0	0	0	0	0	0	0	0.0333111	0	0.028069	0.0516311	0	0	0	0	0	0	0	0	0.0326905	0	0	0	0	0	0	0	0	0	0	0	0	0	0	0.0710512	0	0	0	0	0	1.37175	0	3.14388	0
gene13291	LOC109416827	uncharacterized LOC109416827	208.492	0.0376289	0	0	0	0.0597673	0.0628981	0.143135	0.0708733	0.0608476	0	0.0243804	0.0212045	0.00975108	0.0119313	0.0111304	0.0320638	0.0861061	0.0604102	0.0311163	0	0.0138264	0.0370436	0.0133283	0	0	0	0.0265226	0.0294152	0.0144888	0	0.0578687	0	0.0409516	0.0275757	0.0463025	0.0710526	0.134188	0.13888	0	0	0.0416783	0.058134	4.42072	0.0151415	6.02445	0.0534745
gene14769	LOC109418451	uncharacterized LOC109418451%2C transcript variant X2	205.754	0	0	0.0461961	0	0	0	0.0346765	0	0	0	0	0	0	0	0	0	0.0667534	0.0292705	0	0	0	0	0.0346146	0.0877508	0.0184736	0	0	0.0188133	0.0185334	0	0	0	0	0.0176368	0.0598263	0.0181775	0.0868638	0	0	0	0	0.0845028	2.02421	0	5.02408	0
gene12378	LOC109415831	cytochrome c oxidase subunit NDUFA4-like	314.476	0	0	0	0	0	0	0	0	0	0	0	0	0	0	0	0	0	0	0.0926097	0	0	0	0	0	0	0.0772463	0	0	0	0	0.0215289	0	0	0	0	0	0	0	0	0	0	0	0.936282	0	7.24105	0
gene37472	LOC109405884	uncharacterized LOC109405884	143.711	0	0	0	0	0	0	0	0	0	0	0	0	0.0267403	0	0	0.153874	0.141677	0.0414156	0	0	0	0.0338615	0.018275	0	0	0	0	0	0	0	0.0595097	0	0	0.0756206	0.0634874	0.0389694	0.128793	0	0	0	0	0	3.0786	0.0415224	3.55435	0
gene32285	LOC109400328	testis-specific serine/threonine-protein kinase 6-like	212.73	0	0	0	0	0	0	0	0	0.0454872	0.125413	0.0151882	0	0	0.0445968	0.166412	0.0199746	0.0214564	0.0188168	0	0	0.0172268	0.0153846	0.166062	0	0	0	0	0.0183247	0.018052	0	0	0	0	0	0.0192299	0.053116	0.0668755	0	0	0	0	0.0543232	3.16635	0	5.43106	0
gene21083	LOC109425165	testis-specific serine/threonine-protein kinase 6-like	232.491	0	0	0	0	0	0	0	0	0.0501583	0.103719	0.0167479	0	0	0.0491765	0.183501	0.0660777	0.0236599	0.0207491	0	0	0.0569875	0.0169645	0.146492	0.0414695	0	0	0	0.0202065	0.0199058	0	0	0	0	0	0.0212047	0.0195235	0.073743	0	0	0	0	0.0599018	3.44067	0	5.47148	0
gene20287	LOC109623091	cytochrome c oxidase subunit NDUFA4-like	275.919	0	0.0410786	0	0	0.0318605	0.0335295	0	0.23613	0	0.10061	0	0	0	0	0.0296666	0.0854621	0	0	0	0	0	0	0.0710499	0.120679	0	0.069178	0.0353463	0.196006	0.154472	0	0.0192802	0.0703215	0	0.0734997	0	0	0.0357661	0	0	0	0	0	1.49613	0.0807157	3.39676	0
gene36293	LOC109404608	kelch-like protein 18	180.449	0	0	0	0	0	0	0	0	0.0395821	0	0.0264329	0	0	0	0	0	0.037342	0.032748	0.0337359	0	0.0299808	0.0267748	0.0144504	0.0654506	0.0782893	0.0140696	0.0431331	0.0637831	0	0.0158409	0.0313702	0	0	0.0298972	0.033467	0.0462205	0.0436453	0	0	0.0160885	0.0602494	0	3.66937	0	5.40115	0
gene37821	LOC109406264	uncharacterized LOC109406264	121.16	0.0275958	0.0113026	0.00874014	0	0	0	0	0	0.0398044	0.0677296	0.0298594	0.0544276	0.0143023	0.0700004	0.0625259	0.0275121	0	0	0.00456395	0.029849	0.0642868	0.0724444	0.0195491	0.0110681	0.0387643	0	0.00972541	0.00711882	0.0318768	0.0107152	0.0227049	0	0	0	0.0339568	0.0485644	0.0590454	0.0127313	0	0	0	0	1.87877	0.0444173	4.33679	0
gene31268	LOC109399282	uncharacterized LOC109399282	268.706	0.102678	0	0	0	0	0	0	0	0	0.103	0.0332636	0.0578611	0.0266079	0	0.121486	0	0	0	0	0.111062	0	0.471713	0.0727382	0	0	0	0	0	0	0	0	0	0	0	0	0	0.109848	0	0	0	0	0	2.45742	0	3.87265	0
gene6285	LOC109409301	dynein assembly factor 1%2C axonemal homolog	63.3698	5.30983	0.635496	0.388454	0.179139	0.408394	0.494008	0.89233	0.974129	0.0191161	0.0148234	0	0	0.0382929	0	0.00874188	0.415523	0.270514	0.367712	0.24439	0	0.0108594	0.00484907	0.0209363	0	0.0170144	0.0101924	0.0208311	0.0173272	0.0625878	0.298364	0.374967	0.383352	0	0.730965	0.351542	0.239963	0.379412	0.218155	0.123269	0.00582745	0.0109115	0.00570737	3.31375	0.243792	2.99141	0.195997
gene34162	LOC109402259	potassium/sodium hyperpolarization-activated cyclic nucleotide-gated channel 4-like	102.919	0	0	0	0	0	0.00881726	0.0376221	0	0.0170596	0	0.00854432	0	0	0	0	0.033711	0	0.0211712	0	0	0	0.00865482	0	0.0105783	0.0101227	0	0	0	0.0609324	0	0.0202805	0	0	0	0.0432722	0.0199208	0.0376217	0	0.0231595	0	0.00973766	0	1.69481	0	2.89291	0
gene33383	LOC109401446	uncharacterized LOC109401446	227.597	0	0	0	0	0	0	0	0	0	0.0884613	0.0857047	0	0	0.055923	0	0	0.0807171	0	0	0.031795	0	0	0.0624708	0	0	0	0	0	0	0	0	0.0309152	0	0	0	0	0.12579	0	0	0	0.0325582	0	2.57312	0	5.36232	0
gene2387	LOC109424543	dynein heavy chain 1%2C axonemal-like	47.1548	0	0	0	0	0	0	0	0	0	0.00624358	0	0	0.00483867	0	0	0	0	0	0	0	0	0	0	0	0	0	0	0	0	0	0	0	0	0.0068418	0	0	0.00665865	0.00861437	0	0	0	0	1.24883	0	1.57377	0
gene7630	LOC109410835	uncharacterized LOC109410835	118.665	0	0	0	0	0	0	0	0	0.0101266	0	0	0	0	0	0	0	0	0	0	0	0	0	0	0	0	0	0	0	0	0	0	0	0.0227179	0	0	0	0.122827	0	0	0	0	0	1.33454	0	3.22959	0
gene29232	LOC109397075	cytochrome c oxidase subunit 6A%2C mitochondrial-like	263.846	0	0	0.0678625	0	0.170164	0	0.15282	0.302676	0	0	0	0	0	0	0	0	0	0	0.0885915	0	0	0	0	0	0	0	0	0	0	0	0.0411896	0	0	0	0.0878854	0	0.191023	0	0	0	0	0	3.02065	0	6.80318	0
gene2356	LOC109423773	EF-hand domain-containing protein 1-like	121.861	0.0375925	0.0615882	0.0396876	0.0379772	0.0955353	0.125675	0.202579	0.0826056	0.048631	0.0419005	0.0405948	0.00706135	0.0584499	0.00794652	0.0815437	0.363039	0.160576	0.37217	0.176155	0.00903598	0.0460435	0.0411198	0.0798925	0.0703618	0.0288562	0.0172861	0	0.0979559	0.115798	0.963387	0.722659	0.5623	0.0272747	0.449968	0.359782	0.198755	0.44686	0.127184	0.176053	0	0.0185058	0.0483982	3.97679	0.272284	4.07029	0.0118717
gene25242	LOC109429752	IQ domain-containing protein G-like	122.678	0	0	0	0	0	0	0	0	0	0	0	0	0	0	0.0303415	0.0437032	0	0	0	0	0	0	0	0.0205707	0	0	0	0	0	0	0	0	0	0	0	0	0.0548696	0	0	0	0	0	1.86646	0	3.88856	0
gene30106	LOC109397980	superoxide dismutase [Mn]%2C mitochondrial-like	156.013	0	0.0541777	0	0	0	0	0	0	0	0	0	0	0	0	0	0	0.0302689	0	0	0	0	0	0	0	0.0507682	0.0228093	0.0233087	0	0	0	0	0	0	0	0.0542558	0	0.0471711	0	0	0	0	0	3.44769	0	4.31854	0
gene9442	LOC109412736	heat shock protein 70 B2-like	180.149	0.0544956	0.111601	0.0690393	0.049548	0.0779017	0.0910916	0.0518235	0.0513207	0.0881219	0.0182222	0	0.0537412	0.0282438	0.0431985	0.0322388	1.544	0.349166	1.37794	0.270383	0	0	0	0	0.087428	0.0418311	0.0469851	0.0576165	0.106501	0.0419664	0.0846403	0.167615	0.0382094	0.0790769	0.0599044	0.0894094	0.205802	0.116602	0.276556	0.0239262	0.0214908	0.0201201	0.0772461	2.12611	0.0657857	5.70471	0
gene37714	LOC109406116	uncharacterized LOC109406116	35.7582	0	0	0	0	0	0	0	0	0	0.0152761	0	0.00858145	0.00394625	0	0	0.0194643	0.00696941	0	0	0.00549058	0	0	0	0	0	0	0	0	0.0234543	0	0	0	0	0.0111599	0	0.011502	0.0217222	0	0	0	0	0	0.71894	0	0.937726	0
gene17456	LOC109421207	uncharacterized LOC109421207	169.016	0	0	0	0	0	0	0	0	0	0	0	0	0	0	0	0	0	0.0582135	0	0	0	0	0.0256873	0	0	0	0	0	0	0	0	0	0	0	0	0	0.206893	0	0	0	0	0	1.4979	0	4.25188	0
gene22573	LOC109426745	uncharacterized LOC109426745	169.886	0	0	0	0	0	0	0	0	0	0	0	0	0	0	0	0	0.0667534	0	0	0	0	0	0	0	0	0.0503024	0	0	0	0	0	0	0	0	0	0	0.18205	0	0	0	0	0	3.06047	0	5.24862	0
gene32302	LOC109400279	uncharacterized LOC109400279	393.208	0	0	0	0	0	0	0	0	0	0	0.054717	0	0	0	0	0	0	0.135579	0	0	0	0	0.119651	0	0	0	0	0	0	0.26233	0	0.177636	0	0	0	0	0.180694	0	0	0	0	0	8.82336	0	8.81834	0
gene25079	LOC109623360	chromosome-associated kinesin KIF4-like	83.1312	0.0358841	0	0	0	0	0	0	0	0	0	0	0	0	0	0	0	0.0328454	0	0	0	0	0	0	0	0	0	0	0	0	0	0	0	0	0	0	0	0.0255932	0	0	0	0	0	1.75293	0	3.25925	0
gene1480	LOC109414316	protein CROWDED NUCLEI 2-like	87.0637	0	0	0.015852	0.0151689	0	0.00836618	0	0	0.0161869	0.0167359	0.0324288	0.0493578	0.0453952	0.00793502	0.0148047	0.181256	0	0.0200882	0	0.00902289	0.0183907	0.0164241	0	0.0100371	0	0	0	0.0195628	0	0	0.0288645	0.0263197	0	0	0	0	0.107091	0	0	0	0	0	1.75579	0	3.21203	0.0237091
gene16468	LOC109420218	E3 ubiquitin-protein ligase RNF133-like	228.114	0	0	0	0.060793	0	0.0670589	0	0	0	0.134146	0	0	0.0519806	0.0954044	0.0593332	0.0427311	0.137703	0	0	0	0.147411	0.164559	0.0710499	0	0	0.069178	0	0	0.077236	0	0	0	0.0363838	0	0.287965	0.0378764	0.143064	0.092542	0	0	0.0740589	0	3.02513	0	5.63554	0.0950198
gene11189	LOC109414657	NADP-dependent malic enzyme-like	108.752	0.216413	0.0945472	0.0456948	0.104941	0.143545	0.154344	0.0274402	0.067935	0.037328	0.00964853	0.0373915	0.048781	0.0149549	0	0	0.0122938	0.0924406	0.0463246	0.107375	0.0104037	0	0	0	0	0	0	0	0	0	0	0	0.0202316	0	0	0	0.0544855	0.0514498	0.0266245	0.0126688	0.045517	0.0319603	0.0780134	1.74067	0.104499	4.91959	0.31438
gene16852	LOC109420585	protein MAATS1-like	44.5288	1.03665	0.244956	0.025256	0.0845866	0.139324	0.0933049	0.284372	0.112645	0	0.0399963	0	0	0.0103322	0	0.0117936	0.18686	0.0912373	0.0160026	0.0329706	0	0	0	0.0706129	0.0159915	0.045908	0.110004	0.0421547	0	0.0153522	0.0154816	0.0766465	0.209667	0	0.219143	0.130831	0.165631	0.0853106	0.331102	0.0350109	0.0157236	0	0	1.69934	0.272745	2.33242	1.62429
gene15572	LOC109419348	protein disulfide-isomerase A4 pseudogene	154.251	0	0	0	0	0	0	0	0	0	0	0	0	0	0	0	0	0	0	0	0	0	0	0	0	0	0	0	0	0	0	0	0	0	0.0506658	0	0	0.098619	0	0	0	0	0	3.51332	0	3.96459	0
gene10846	LOC109414288	uncharacterized protein C4orf22 homolog	154.232	0.0347537	0	0	0	0	0	0	0	0	0	0	0	0	0	0	0	0	0	0	0	0	0.0228088	0	0	0	0	0	0.108671	0	0	0	0.0243675	0	0	0	0	0.0743608	0	0.0610343	0	0	0	1.89141	0	2.14005	0
gene1872	LOC109418551	uncharacterized LOC109418551	301.846	0	0	0	0	0	0.0299909	0	0	0.0580263	0.239978	1.07531	0.353874	0.232474	0.170671	0.477642	0	0.164227	0	0	0.0646901	0.19778	0.0588767	0.0953274	0.179904	0.034431	0.0309386	0	0.105192	0	0	0.0689819	0.0629001	0.195264	0.0328714	0.0367963	0	0.127966	0	0	0	0	0	4.08822	0	8.42433	0
gene8538	LOC109411786	radial spoke head protein 9 homolog	126.687	0	0	0	0	0	0	0	0	0	0	0	0	0	0	0	0	0	0	0	0	0	0	0	0.02342	0	0	0	0	0	0	0	0	0	0	0	0	0	0	0	0	0	0	2.259	0	2.51697	0
gene18476	LOC109422407	bax inhibitor 1-like	146.417	0	0	0	0	0	0	0	0	0	0	0	0	0	0	0	0	0	0	0	0	0	0	0	0	0	0	0	0	0	0	0	0	0	0	0.0554583	0	0.0482166	0	0	0	0	0	1.32985	0	3.72061	0
gene22067	LOC109426178	uncharacterized LOC109426178%2C transcript variant X2	259.9	0	0.0645522	0.0249585	0	0	0.0263446	0	0	0.0254857	0	0	0	0	0	0	0.537191	0.216391	0.284653	0	0	0	0	0.149053	0.316063	0.0804514	0.135885	0.305493	0.297538	0.293111	0.061197	0.272678	0.193384	0.0285873	0.250057	0.0969678	0.138682	0.23437	0.0363558	0	0	0.0581892	0.0304364	3.34987	0.0317098	6.24762	0
gene15080	LOC109418792	uncharacterized LOC109418792	84.2089	0	0	0	0	0	0	0	0	0	0	0.0127355	0.0110765	0	0.012465	0.0116282	0.0837451	0.0179915	0.0315562	0	0	0.0433347	0.59341	0	0	0.015088	0	0.0138545	0.0153655	0	0	0	0	0	0	0	0	0.056076	0.0362731	0	0	0	0	1.83017	0	1.66426	0
gene17741	LOC109421604	tektin-B1-like	114.963	0.0634282	0.0519576	0.0401779	0.0192232	0.0906709	0.159034	0.180954	0.134399	0.0410266	0.0106045	0	0.0178715	0	0	0.0187616	0.391845	0	0.101829	0	0	0	0	0.0673996	0.127198	0.0852036	0.0546866	0.0335304	0.0991661	0.18317	2.46704	1.99967	3.16133	0	2.59139	1.63902	1.10187	2.19405	1.12661	0	0	0.023418	0.0367471	5.1815	0.846596	2.78285	0.0901381
gene9385	LOC109412669	dynein intermediate chain 2%2C ciliary-like%2C transcript variant X4	109.164	5.70238	0.736529	0.217913	0.33809	0.531511	0.590719	0.631989	0.75103	0.0606861	0.0627445	0.0506578	0.0132177	0.141826	0.0396655	0.0786308	0.166556	0.336354	1.17989	0.413783	0.00563795	0.0287286	0.0051313	0.166162	0.081532	0.0420108	0.0431424	0.0495978	0.061119	0.0481677	0.151793	0.288576	0.252169	0.0113453	0.223458	0.365588	0.60825	0.289968	0.541061	0.350138	0.135666	0.0461863	0.0664351	2.70687	0.182474	6.44537	0.474067
gene33606	LOC109401732	uncharacterized LOC109401732	130.938	0	0	0	0	0	0.0447926	0.00796351	0	0.070415	0.022401	0.043406	0.00943793	0.117183	0.0371736	0.0544941	0	0.01533	0	0.0138496	0	0	0.0164878	0	0.0201521	0.012856	0.00577601	0	0	0	0	0	0.00587149	0.0121514	0	0.0274784	0.00632497	0.0776433	0.0309071	0	0.0132096	0	0.0323436	2.13048	0	4.33798	0
gene601	LOC109622130	uncharacterized LOC109622130	174.569	0	0.00781754	0	0	0	0.00638088	0	0	0.0873553	0.0709782	0.0655811	0.0733348	0.0625011	0.0550185	0.108296	0.00813201	0	0.0619813	0.0717428	0.0452528	0.127515	0.0981255	0.068221	0.0347969	0.00732557	0.0299206	0.00672664	0.0187637	0	0	0.0406943	0.00669133	0	0.00699375	0.0355855	0.0109214	0.0618775	0.0488315	0.012697	0	0	0	2.91075	0	6.3552	0
gene3741	LOC109401534	cilia- and flagella-associated protein 20-like	115.88	0	0	0	0	0	0	0	0	0	0	0	0	0.0143558	0.0351311	0	0	0	0	0	0	0	0	0	0	0	0	0	0	0	0	0	0	0	0	0	0	0.0592662	0	0	0	0	0	1.85256	0	3.68845	0
gene37405	LOC109405790	uncharacterized LOC109405790	92.7757	0	0	0	0	0	0	0	0	0	0	0	0.0125623	0	0.014137	0.013188	0.0759827	0.0204048	0.035789	0	0	0.0491474	0.629116	0	0	0.0171119	0	0.0157129	0.0174265	0	0	0	0	0	0	0	0	0.127196	0.0411386	0	0	0.0329222	0	1.79793	0	1.87034	0
gene16308	LOC109420041	cytochrome b5 domain-containing protein 1	217.586	0.0682271	0	0	0	0	0	0.0648816	0	0.0441305	0	0	0	0	0.0432667	0.0403622	0	0.187349	0.0547667	0.0564188	0.0491985	0	0	0	0.0547288	0	0.0470593	0.0480896	0	0.105082	0	0.0524625	0.0478372	0	0.0999983	0.0559691	0.0515318	0.243303	0	0	0	0	0	2.72894	0	3.62359	0.0646385
gene31272	LOC109399279	EF-hand calcium-binding domain-containing protein 1-like	207.621	0	0	0	0	0	0	0	0	0.0210673	0	0	0	0	0	0	0	0	0	0	0	0	0	0	0	0	0	0	0	0.0752469	0	0	0.0456737	0	0.0954758	0.213751	0	0.2323	0	0	0	0	0	2.60552	0	4.71322	0
gene34628	LOC109402758	uncharacterized LOC109402758	167.37	0	0	0	0	0	0	0	0	0.0345054	0	0	0	0	0	0.0315589	0	0	0	0	0	0	0	0	0	0	0	0	0	0	0.0414276	0	0	0	0	0	0	0.114142	0	0	0	0	0	2.92077	0	6.52881	0
gene36090	LOC109404386	uncharacterized LOC109404386	86.2269	0	0	0	0	0	0	0	0	0	0.0146687	0	0	0.011368	0	0	0	0	0	0	0	0	0	0	0	0	0	0	0	0	0	0.0337322	0	0	0.0321484	0	0	0.0782194	0	0	0	0	0	1.12182	0	2.36365	0.0207806
gene6499	LOC109409551	cytochrome c-like	471.08	0.155713	0	0	0	0	0	0.222117	0	0.0503592	0	0	0	0	0	0	0	0.142528	0	0	0.44914	0	0	0	0.124906	0.0597632	0	0	0	0	0	0	0	0	0	0.127737	0	0.222115	0	0	0	0	0	6.53451	0	8.92926	0
gene5515	LOC109408520	protein disulfide-isomerase A4-like	134.024	0	0	0	0	0	0	0	0	0	0	0	0.0389598	0	0	0	0	0	0	0	0	0	0	0	0	0	0	0	0.0540455	0	0	0	0	0	0	0	0	0	0	0	0	0	0	2.92399	0	4.52336	0
gene8514	LOC109411777	kelch-like protein 18	156.91	0	0	0	0	0	0	0.0373844	0	0.0635694	0	0.025471	0	0	0	0.0232564	0.033498	0.0359831	0.0315562	0	0	0.0288898	0.0258004	0.0139245	0.0630688	0.015088	0.0135576	0.0415634	0.0614619	0	0.0152645	0.0302286	0	0	0.0288092	0.0322491	0.0742309	0.070095	0	0	0.015503	0	0	2.77954	0.0316376	5.11382	0
gene33619	LOC109401743	uncharacterized LOC109401743	44.8672	0	0	0	0	0	0	0	0	0.00980966	0.0557831	0	0.00854631	0.00393009	0	0	0.0323076	0.00694087	0	0.0125412	0.0054681	0	0	0.0107437	0	0	0	0	0	0.0116791	0	0	0	0	0	0	0	0.0216333	0	0	0	0	0	0.835329	0	1.30744	0
gene19803	LOC109423830	uncharacterized LOC109423830	135.236	0	0	0	0	0	0	0	0	0	0	0	0	0	0	0	0	0	0	0	0	0	0	0.0503189	0	0	0	0.0500659	0	0	0	0	0	0	0	0	0	0.0506604	0	0	0	0	0	2.11917	0	3.19843	0
gene34170	LOC109402273	histone H3.3 type a-like	136.927	0	0	0	0	0	0	0	0	0	0	0	0	0	0	0	0	0	0	0	0	0	0	0	0	0	0	0	0	0	0	0	0	0	0	0	0	0	0	0	0	0	0	1.16994	0	3.36337	0
gene3598	LOC109621859	protein disabled-like%2C transcript variant X1	157.807	0	0	0	0	0	0	0	0	0	0	0	0	0	0	0	0	0	0	0	0	0	0	0	0	0	0	0	0	0	0	0	0	0	0.0614876	0	0	0.119683	0	0	0	0	0	1.56796	0	2.91719	0
gene668	LOC109622294	myosin-J heavy chain-like	158.001	0.0255431	0	0	0	0	0.00853927	0	0	0.0908698	0.0512465	0.0744745	0.00719701	0.0397153	0.0809919	0.0831103	0	0	0.0307557	0.0211223	0	0.0187712	0.0670557	0.0995224	0.0102448	0.0490176	0.0264274	0	0.0399351	0	0.0198363	0	0.0179095	0.00926622	0.0187189	0	0.00964636	0.0364356	0	0	0	0	0.0295968	3.14038	0	5.12171	0
gene32234	LOC109400219	uncharacterized LOC109400219	82.8494	0.151869	0.0533163	0.0412286	0.0263012	0.03446	0.0725302	0.0618954	0.143022	0.0350829	0	0.0070285	0	0	0.0343961	0.00641742	1.95962	0.0794337	0.52246	0.134555	0	0.0159438	0.0284776	0.0307387	0.00870164	0.00832683	0	0	0	0.0668301	0.918237	1.12608	1.20934	0	1.00166	0.711908	0.450634	0.974843	0.410379	0.114305	0.0598911	0.0720912	0.0670365	3.72007	0.68095	2.0958	0.123327
gene36452	LOC109404781	protein PIH1D3-like	116.26	0.736178	0.0262193	0	0.0194012	0.14235	0.107004	0	0.361716	0	0	0	0	0	0	0	0.190918	0	0.102772	0.0794042	0.0461616	0	0	0	0	0	0	0.0225606	0	0.295785	1.29254	1.27983	0.807916	0	1.14936	1.31286	0.870316	1.34688	0.502069	0.365377	0.0504902	0.0945394	0	3.33703	0.309111	1.97096	0.363891
gene19560	LOC109423556	uncharacterized LOC109423556	76.9593	0.173835	0.0406852	0.0471917	0.0150527	0.0552218	0.0498124	0.11808	0.140321	0.0240943	0	0.0241352	0.0139942	0	0.0393711	0.036728	1.78809	0.068192	0.617961	0.174552	0	0	0.0325965	0	0.00996022	0.00953119	0	0	0	0.0956202	0.742483	0.973873	1.23625	0	1.16473	0.580599	0.497055	0.735037	0.378079	0.152644	0.0685535	0.0275061	0.0575493	3.86732	0.619555	1.7968	0.0352911
gene19821	LOC109423897	protein PIH1D3-like	121.363	0.241979	0.169901	0	0.0209533	0.0658875	0.115565	0	0.260436	0	0	0	0	0	0	0	0.324015	0	0.110994	0.0285855	0	0	0	0	0.0554585	0	0	0.0243654	0	0.212965	0.859043	1.38221	0.945262	0.150483	1.74797	1.07759	1.3838	1.7998	1.18016	0.151772	0.0545294	0	0	3.71732	0.44512	3.05992	0.393002
gene10467	LOC109413847	uncharacterized LOC109413847	135.045	0	0.0411184	0	0.015213	0.00637827	0	0	0	0.0162339	0.033569	0	0	0	0.0159161	0	0.106931	0.367564	0.80586	0.601873	0	0	0.0329436	0	0.0805302	0	0	0	0.0392392	0.0966385	0.0389813	0.0964945	0	0	0.0367854	0.123533	0.284348	0.125302	0.648421	1.10193	0.831402	0.148261	0.252036	0.954498	0	3.20687	0
gene30021	LOC109397922	uncharacterized LOC109397922	155.383	0	0	0	0	0	0	0	0	0.0930353	0.0480954	0.0582459	0.0303951	0.0093183	0	0.0212727	0	0	0	0	0	0	0	0	0	0	0	0	0	0	0.0139624	0	0	0	0	0	0.0271596	0.179525	0	0	0	0.0265523	0	2.85297	0	5.86778	0
gene3179	LOC109432826	uncharacterized LOC109432826	87.9638	0	0	0	0	0	0	0	0	0.0212408	0	0	0	0	0	0	0	0.0300581	0	0	0.01184	0	0.0323281	0	0	0	0	0	0	0	0	0	0	0	0	0	0	0.0585531	0	0	0	0	0	0.997603	0	2.43921	0
gene23551	LOC109427820	dynein heavy chain 1%2C axonemal-like	62.0886	0	0	0	0	0	0.00701243	0	0	0.0271353	0	0	0	0.00543568	0	0.00620454	0	0.0191997	0	0	0	0	0	0	0	0	0	0	0	0	0.0162895	0	0	0	0.00768595	0	0	0.0224406	0.00967723	0	0	0	0	1.1966	0	1.87289	0
gene21979	LOC109426092	uncharacterized LOC109426092	203.174	0.0615826	0	0	0	0	0	0	0	0	0	0	0	0	0.0390531	0	0	0	0	0	0	0	0	0	0	0	0	0	0	0	0	0	0	0	0	0	0	0.0439218	0	0	0	0	0	1.53444	0	3.69731	0
gene16845	LOC109420662	dynein heavy chain 7%2C axonemal	45.5638	0.695399	0.251208	0.0820794	0.104723	0.117999	0.173275	0.0698268	0.219651	0.036319	0.00288853	0.0223882	0.00243397	0.00223857	0.0136954	0.0281073	0.485821	0.106744	0.135217	0.0857208	0.00311461	0.00317415	0.00850415	0.088734	0.259853	0.232083	0.0804378	0.0882878	0.0337644	0.0199572	0.140878	0.518114	1.45062	0.0219364	1.27878	1.12675	1.25273	0.394312	1.17967	0.0493054	0.1022	0.0637875	0.0433741	6.91609	0.976771	1.905	0.126854
gene1426	LOC109413825	putative inorganic phosphate cotransporter	48.5154	0	0	0	0	0.146547	0	0.00965143	0	0	0	0.0298899	0.00831882	0.00270971	0.00234041	0.00909705	0	0.0140752	0.0123436	0	0.0248385	0	0.0163493	0	0	0.0236075	0.021213	0	0	0.0473678	0.0238835	0	0.0646908	0.0334705	0.0338073	0.0378439	0	0.0767719	0	0	0	0	0.047514	0.736059	0.0742527	1.36117	0
gene26978	LOC109431432	IQ domain-containing protein D-like	73.3124	0.0234415	0	0	0	0	0	0	0	0	0.0940601	0	0	0.0121492	0.0445968	0	0	0	0	0	0.0338073	0.0172268	0.0307692	0	0.0188037	0.0179938	0.0161686	0.0165226	0	0.018052	0.0182042	0	0	0.0170076	0.0171787	0	0	0.0167189	0	0	0	0	0	1.12206	0	1.26304	0
gene27383	LOC109431897	uncharacterized LOC109431897	95.3754	0	0	0	0	0	0	0	0	0.0250106	0.0387884	0	0	0.0501006	0.0490421	0.0228749	0	0	0	0	0	0	0.0253772	0	0	0	0	0	0	0	0	0.0297327	0	0	0.0283366	0	0	0.068945	0	0	0	0	0	1.68605	0	3.37808	0.0183167
gene5198	LOC109408154	putative inorganic phosphate cotransporter	53.4781	0.0344078	0	0	0	0.0546512	0	0	0	0	0.0230105	0.0111467	0	0	0	0	0.0293191	0.0157471	0.0276195	0	0.0372172	0	0	0	0	0.0528232	0.0237326	0	0	0.026497	0.0267204	0	0	0.0374461	0.0126076	0.0705649	0	0.110431	0.031748	0	0	0	0	0.800926	0.110763	1.86715	0.032598
gene12667	LOC109416136	uncharacterized LOC109416136	101.917	0	0	0	0	0	0	0	0	0.0479132	0.0495383	0.0839906	0.0104357	0.00959785	0	0	0.0315599	0	0	0	0	0	0	0	0	0	0	0	0	0	0.0143813	0	0	0	0	0.0303832	0	0.0792474	0	0	0	0	0	1.74857	0	4.19076	0
gene26465	LOC109430871	protein I'm not dead yet-like	43.0577	0.0565459	0	0.0179092	0	0	0.0472593	0	0	0	0.00945388	0	0	0	0	0.0167259	0	0	0	0.0116898	0	0	0	0	0	0	0.0292517	0	0.0331522	0.0435453	0	0	0	0	0	0.0115967	0.0106773	0.0100824	0.0130437	0.062066	0	0.020877	0.0545997	1.29771	0	1.7301	0.0803575
gene29470	LOC109397272	uncharacterized LOC109397272	106.898	0	0	0	0	0	0	0	0	0.0288138	0.148955	0.115451	0	0.0923505	0.0564995	0.15812	0	0	0	0	0	0.147316	0.014618	0	0	0	0	0	0	0	0	0	0	0	0	0	0	0.0635432	0	0.0195583	0	0	0	1.44587	0	3.39458	0
gene28827	LOC109433381	WD repeat-containing protein on Y chromosome-like	63.9915	0	0	0	0	0	0	0	0	0.0430404	0.0111251	0.0377244	0	0	0	0.00492064	0.0141751	0.0304534	0.00667672	0	0	0	0.0109178	0	0.0133442	0.0191541	0	0.0058627	0.0130042	0	0.0387561	0	0	0	0.012191	0	0	0.0533909	0	0	0	0	0	1.23259	0	2.36245	0
gene8647	LOC109411849	heat shock protein 70 B2-like	115.592	0.0516975	0	0.0654944	0	0.12317	0	0.0245813	0	0.0835972	0.0172865	0.0167479	0.0218493	0	0.0245883	0	0.0440518	0.0236599	0.0207491	0.04275	0.037279	0	0.0169645	0	0.0207347	0.0595248	0.0267435	0.0182194	0	0.0597174	0	0	0	0	0	0	0	0.0553073	0.0238506	0	0	0	0	1.57627	0	3.56144	0.0489783
gene26925	LOC109431486	uncharacterized LOC109431486	112.556	0	0	0	0	0.0501427	0	0	0	0	0.0791708	0	0	0	0.0250249	0.0466899	0.100877	0.03612	0.0633526	0	0	0	0.0776958	0	0	0.0605818	0	0	0	0	0	0	0.0276684	0	0	0.0323718	0	0.112579	0.0364111	0	0	0	0	1.39726	0	2.55145	0
gene31568	LOC109399555	failed axon connections-like	158.129	0.0214977	0	0	0	0	0	0	0.0404906	0.097336	0.0862607	0.0139288	0	0.0779925	0.0408989	0.0381533	0.0183184	0	0	0	0.170522	0.0157984	0.0564358	0.0304584	0.0517337	0.0495053	0.0296559	0.0757631	0.168052	0	0	0.033061	0	0.0623895	0	0.0176354	0	0.0459977	0.0396718	0.0188771	0	0	0	4.82088	0	6.35415	0
gene12134	LOC109415602	IQ domain-containing protein D-like	71.1435	0.0254679	0	0	0	0	0	0	0	0	0.102191	0	0	0.0131994	0.0484519	0	0	0	0	0	0.0367297	0.0187159	0.033429	0	0.0204292	0.0195492	0.0175663	0.0179509	0	0	0.0197778	0	0	0.0184778	0.0186637	0	0	0.0181641	0	0	0	0	0	1.01866	0	1.21539	0
gene2350	LOC109423953	calmodulin-like	235.319	0	0	0	0	0	0	0	0	0.0687279	0	0	0	0	0	0	0	0	0	0	0	0	0	0	0	0	0	0	0	0	0	0	0	0	0	0	0	0.075783	0	0	0	0	0	3.48359	0	4.08934	0
gene25456	LOC109429792	uncharacterized LOC109429792	119.009	0.0395218	0.0161872	0.0876212	0.0239558	0.0125548	0.1057	0.0751677	0.0558289	0.0639086	0.0792915	0.0128035	0.0222712	0.0102416	0.025063	0.046761	0.0336768	0	0.0317246	0.114386	0.0142496	0.0435659	0.0389071	0	0.0158513	0.0151685	0.01363	0	0.0308949	0	0.0306918	0.0151949	0	0	0	0.0162106	0.0149254	0.0422814	0.0182333	0.052056	0.0155858	0.0291833	0	1.90472	0.0159032	3.83301	0.0187215
gene38117	LOC109406574	UPF0605 protein GA14893-like	258.296	0.600443	0.245928	0.163005	0.07799	0.21799	0.37279	0.346679	0.323121	0.20806	0.215117	0.208413	0.0725058	0.244511	0.0951939	0.583566	0	0.039257	0.137709	0.159597	0.0773178	0.0787958	0.0422218	0.151914	0.275228	0.148147	0.0443735	0.0755751	0.117345	0.0165141	0.0499598	0.0659578	0.10525	0.202263	0.0471456	0.10555	0.129576	0.16824	0.0593601	0.0564908	0.0676543	0	0.0331301	2.95284	0.172581	7.85695	0.304747
gene19174	LOC109423155	uncharacterized LOC109423155	105.619	0	0	0	0	0	0	0	0	0.0314332	0.0324994	0.0314866	0	0.0251865	0.0308179	0.100622	0.0414095	0	0.0390091	0	0	0.0714257	0.0159469	0	0	0	0	0	0	0	0	0	0	0	0	0	0	0.0346599	0	0.0213363	0	0	0	1.67291	0	2.78673	0
gene10761	LOC109414171	MAPK/MAK/MRK overlapping kinase-like	78.8396	0.291922	0	0.0231143	0.0221182	0	0.0243979	0.277608	0.0687286	0.0236025	0.0732093	0.212784	0.0616886	0.018912	0.0694216	0.453329	0.155468	0.167001	0.0878733	0	0	0.13408	0.0478969	0.18095	0.234167	0.14005	0.151014	0.10288	0.342301	0.365308	0.311713	0.0561176	0.281435	0.1059	0.374378	0.20954	0.055122	0.468458	0.303025	0.0640839	0.230244	0.0269447	0.140937	2.0577	0.1762	2.44359	0.138284
gene3837	LOC109622035	radial spoke head 1 homolog	140.282	0	0	0	0	0	0	0	0	0.0567179	0.117283	0.0568144	0.131769	0.302976	0.0926795	0.276665	0	0.0535081	0.0703878	0	0.0632315	0.214801	0.0959153	0.144943	0.0937855	0.0673093	0.060482	0.0618063	0	0.022509	0.0453976	0	0.0409879	0.106034	0.0428403	0.0719333	0.0220768	0.104234	0.0809091	0.0256661	0	0	0	1.60992	0	3.59973	0
gene366	LOC109403492	failed axon connections-like	213.655	0.0229436	0	0	0	0	0	0	0	0.163244	0.0306874	0.0445968	0.0517165	0.178367	0.130949	0.0678656	0.136853	0	0.0368342	0.0379454	0.148902	0.0168609	0.0903471	0.195041	0.0552131	0.0528349	0.0633009	0.0808586	0.215226	0.0706744	0.0712701	0.0352845	0	0.0332928	0.0336277	0.0941074	0	0.114546	0.04234	0.0201467	0	0	0.0708926	5.64157	0	8.08836	0
gene27210	LOC109431631	protein I'm not dead yet-like	35.8693	0.0550452	0	0	0	0	0.0460051	0	0	0	0.00920298	0.0178324	0	0	0	0	0	0	0	0.0113796	0	0	0	0	0	0	0.0284753	0	0.0322724	0	0	0	0	0	0	0.0112889	0.0103939	0.00981479	0.0126975	0.0604188	0	0.0406459	0.0531506	1.2001	0	1.57826	0
gene27056	LOC109431549	golgin subfamily A member 4-like	189.587	0	0	0	0	0	0.00844772	0	0	0.171619	0.101394	0.0900484	0.0355992	0.0785789	0.0801235	0.0224234	0	0.0231295	0.0304259	0	0.0182217	0.12999	0.0331684	0.170059	0.0304049	0.0290952	0.0610027	0	0.039507	0	0.0392472	0	0.0708699	0.00916688	0	0	0.00954293	0.0540674	0	0.0221889	0	0.0186591	0.00975982	2.92445	0	6.40887	0
gene18097	LOC109421960	uncharacterized LOC109421960	99.3785	0.102882	0.0632073	0.0488771	0.0311805	0	0.0171971	0	0.0242221	0.0831826	0.0172008	0.0333296	0	0.0266607	0.0163109	0.106511	1.24925	0.211882	0.578092	0.191421	0.0185471	0.0189016	0.0675213	0.0182206	0.123791	0.0394864	0.0709624	0.036258	0.0804249	1.18842	0.679117	0.672436	0.559049	0.0933057	0.301582	0.443089	0.388534	0.715428	0.308519	0.0225851	0.0202862	0	0.0794728	3.30554	0.227694	3.22701	0.0243677
gene3398	LOC109398553	trypsin 3A1-like	102.406	0	0	0	0	0	0	0	0	0.0164408	0	0	0	0	0	0	0	0.046531	0	0	0	0	0	0	0	0	0	0	0	0	0	0	0	0	0	0.0208512	0	0.036257	0	0	0	0	0	1.23333	0	2.21081	0
gene37363	LOC109405736	WD repeat-containing protein on Y chromosome	43.8999	0	0	0	0	0	0	0	0	0.0309307	0.0106599	0.0258194	0.00898243	0	0	0.00471492	0	0	0.00639758	0	0	0	0.0104613	0	0	0.0183533	0	0.0056176	0	0	0.0123786	0	0	0	0	0.0261522	0	0.0284216	0	0	0	0	0	0.857052	0	1.50299	0
gene486	LOC109622048	SRSF protein kinase 2-like	37.9838	0	0	0	0	0	0.010525	0	0	0	0.0315818	0.0101992	0	0	0	0.0186249	0.0134135	0.028817	0	0	0	0	0	0	0	0	0	0.0332861	0	0	0.0366736	0	0	0	0	0	0.0118896	0.0224542	0	0	0	0	0	0.867028	0	1.5388	0
gene3714	LOC109401051	putative inner dynein arm light chain%2C axonemal	97.9745	0.0500991	0	0	0	0.0159149	0	0	0	0.032405	0.100513	0.0162301	0.0423476	0.0389478	0.0635415	0.163009	0.0426898	0	0.0603227	0.0414283	0.144506	0.165677	0.11508	0.337161	0.924308	1.24983	0.570167	0.688587	0.274144	0.385807	0.19453	0.231139	0.544465	0.617927	0.84443	0.287687	0.359478	0.303718	0.161792	0.0439919	0.0987851	0.0554905	0.232199	2.84154	0.221754	2.93073	0.094928
gene22739	LOC109426878	carbonic anhydrase 1-like	62.9346	0.0262678	0	0	0.0318439	0	0	0	0	0	0	0	0	0	0	0	0.156681	0	0.105427	0.0217215	0	0	0.034479	0	0	0	0.0181181	0.0185147	0.020534	0	0.040798	0.0201983	0	0	0.0192499	0.0430968	0.0595201	0.0187346	0	0.0230657	0	0	0.0405819	1.13677	0	1.31422	0.0248861
gene4425	LOC109407362	tektin-B1-like	57.8777	0	0.0732754	0.0566626	0.0180736	0.0284161	0.0897139	0.340265	0.0982811	0.0192865	0.00997033	0	0	0	0	0.0176396	0.139742	0	0.0478696	0	0	0.0219124	0	0	0.0239183	0.034332	0.0102832	0.0525418	0.0233089	0.103329	1.40856	1.21518	1.66896	0.0649008	1.55144	0.880572	0.653112	1.03142	0.632787	0	0	0	0.0575824	2.73387	0.571838	1.43444	0.0564983
gene32701	LOC109400706	dnaJ homolog subfamily B member 13-like	101.023	0	0	0	0	0	0	0	0	0.0337077	0.0174255	0	0.0146833	0	0.0660959	0.0154147	0	0	0.0209159	0	0.0375788	0.0765942	0.0171009	0.14767	0.0418029	0	0	0	0	0	0	0.0200359	0	0	0.0572855	0	0.0196805	0.0743359	0.072127	0.0228802	0	0	0	1.81105	0	2.90816	0
gene19660	LOC109423675	uncharacterized protein C4orf22 homolog	82.7291	0.0353701	0	0	0	0	0	0	0	0	0	0	0	0	0	0	0	0	0	0	0	0	0.0232133	0	0	0	0	0	0	0	0	0	0.0247996	0	0	0	0	0.0252266	0	0.0621168	0	0	0	0.718961	0	1.79686	0
gene22508	LOC109426637	E3 ubiquitin-protein ligase MARCH3-like	138.413	0.129147	0.0528958	0	0	0.0820517	0	0.122815	0	0.0626511	0.0647761	0.0836769	0.0181942	0.0167335	0.0409498	0.133703	0	0.147764	0	0	0.023282	0	0	0.0228722	0	0	0	0	0	0	0	0.0248266	0	0.0234252	0	0.052972	0.0243862	0.0230275	0.119164	0.0567019	0	0	0	1.24906	0	3.4047	0
gene14580	LOC109418171	uncharacterized LOC109418171	86.6118	0	0	0	0	0	0	0	0	0	0	0	0	0	0	0	0	0	0	0	0	0.027533	0	0	0	0	0	0	0	0.0577038	0	0	0	0	0	0	0	0.0534424	0	0	0	0	0	1.32658	0	2.45124	0
gene6485	LOC109409598	exonuclease 3'-5' domain-containing protein 2	87.1584	0.0754768	0	0	0	0	0	0	0	0	0	0	0	0.00977947	0.00813691	0	0	0	0	0.0312069	0.0174164	0	0	0	0.121088	0	0	0	0	0	0	0	0	0	0	0	0	0	0	0	0	0	0	2.37554	0	2.99195	0
gene11181	LOC109414652	leucine-rich repeat-containing protein 74A-like	112.327	0	0	0	0	0	0	0	0	0.100237	0.0414546	0.0100407	0	0.120475	0.0294824	0.0183355	0.013205	0.0283692	0	0	0	0.0911073	0.0406823	0	0.0124309	0.0475819	0	0	0.0484568	0.011934	0.0120346	0	0	0	0	0	0	0.0773685	0	0	0	0	0	1.2092	0	3.16099	0
gene24902	LOC109429329	putative inner dynein arm light chain%2C axonemal	55.749	0.0971932	0	0	0	0.0154376	0.0324925	0.0924274	0.0457654	0	0.0162497	0	0	0.0251865	0	0.0574981	0.103524	0	0.136532	0.0401858	0.035043	0	0.0159469	0.120492	0.545749	0.50359	0.184356	0.274025	0.265922	0.112271	0.113217	0.0747358	0.30666	0.211551	0.427359	0.0797311	0.0917624	0.13864	0.0672599	0	0.038329	0	0.0375392	1.09934	0.0977742	1.98251	0
gene15263	LOC109418993	WD repeat-containing protein 78-like	45.4399	0.139273	0	0	0.0129876	0.0136131	0	0	0.0201784	0.0207888	0.0143293	0.00694137	0	0.011105	0.0747334	0.0316893	0.383414	0.0294184	0.687978	0.0177183	0	0.133842	0.928112	0.053126	0.077344	0.271379	0.177347	0.196333	0.24287	0.899273	1.06493	1.07917	0.87886	0.388645	0.502471	0.597621	0.469323	0.832862	0.227359	0.0470368	0.0168996	0	0.0579298	1.81942	0.241413	1.22045	0.0202997
gene31807	LOC109399824	protein Cep78 homolog	220.043	0.0260173	0.00703304	0	0	0	0.0173956	0.0494832	0	0.235599	0.104396	0.0674285	0.11729	0.0606788	0.148492	0.184698	0.0332543	0.0238142	0.0835377	0	0.140708	0.162518	0.110988	0.0184309	0	0.019971	0.026918	0.0183382	0.0305074	0	0.0202045	0.0700202	0.0456049	0.0566295	0.0667324	0.021343	0.0393018	0.111336	0.0120031	0	0	0.0576344	0.0100487	5.08668	0.0209383	8.0605	0
gene35696	LOC109404022	RIB43A-like with coiled-coils protein 2	168.831	0.164902	0.255152	0.0464246	0.0999539	0.116409	0.269515	0.313633	0.31059	0.154067	0.0490132	0.0356144	0.0619502	0.0284883	0.0580966	0.0867145	3.24744	0.318647	1.13249	0.772718	0	0	0.036075	0.0519192	0	0	0.0505513	0	0	0.465627	2.40467	3.31089	2.85197	0	2.55119	1.72852	1.68835	2.79653	1.0989	0.611379	0.187866	0.027059	0.155688	4.92578	0.693043	5.7964	0.0173587
gene2121	LOC109421191	radial spoke head 1 homolog	122.521	0	0	0	0	0.0257978	0	0	0	0.100591	0.10862	0.0394631	0.141866	0.147312	0.0411999	0.216192	0.0387518	0.0371665	0.0488911	0	0.0732006	0.0895199	0.0399735	0.10643	0.11172	0.0779214	0.0448113	0.0515165	0	0.0156347	0.0031533	0.00312228	0.0569401	0.0765969	0.0297567	0.0499646	0.0153345	0.107153	0.0561992	0.0178276	0	0.00299831	0.0313659	1.33124	0	2.72289	0
gene23314	LOC109427559	uncharacterized LOC109427559	74.6766	0	0	0	0	0	0	0	0	0.0467771	0.0241819	0	0.0203765	0	0	0	0	0.0330974	0	0	0.0391118	0.026573	0	0	0	0	0	0	0	0.0139229	0.0280806	0.0556088	0	0	0	0	0	0	0	0.0317515	0	0	0	1.90864	0	2.78326	0
gene3177	LOC109432846	uncharacterized LOC109432846	74.1432	0	0	0	0	0	0	0.0342193	0	0.0465499	0.168451	0.0233145	0.0811099	0.0372991	0.0228194	0	0	0	0	0	0.0908175	0.0264439	0	0.0254912	0	0	0	0	0	0.0138553	0	0	0	0.0261075	0.0527403	0	0	0.0256642	0	0	0	0	0	1.54545	0	2.93593	0
gene23278	LOC109427470	tctex1 domain-containing protein 2	152.46	0	0	0	0	0	0	0.0797897	0	0.0542706	0	0	0	0	0	0	0	0	0	0.0693823	0	0	0	0	0.067304	0	0	0	0.0655892	0	0	0	0.0588289	0	0	0	0.0633725	0	0.0774178	0	0	0	0	0.330096	0	4.13328	0
gene30089	LOC109398043	cilia- and flagella-associated protein 44-like	26.2763	0.052803	0.0360449	0.0139365	0.00266717	0.0195694	0.0235366	0.00418449	0.0745902	0.0199232	0.0117708	0.00285101	0.00991848	0.0136833	0	0.00520625	0.0637412	0.0201382	0.0141285	0.00727737	0.00317302	0.00323368	0.0115515	0.0155859	0.0352969	0.010133	0.0273155	0.018609	0.0275181	0.0948802	0.416892	0.581967	0.487465	0.00319254	0.42243	0.173265	0.149558	0.536655	0.0893222	0	0.00347056	0	0.0475866	1.48302	0.16998	1.0127	0.0125064
gene22559	LOC109426770	tetratricopeptide repeat protein 12-like	91.4605	0.385044	0.105137	0.0464575	0.0333415	0.186386	0.0735561	0.278982	0.241741	0.0592985	0.0245239	0.0118799	0.092991	0.0380113	0.127903	0.119317	1.48425	0.0335655	0.52985	0.227431	0.0661083	0.0538976	0.072201	0.0389669	0.0588315	0.042223	0.050587	0.038771	0.0286663	0.211798	0.939768	1.05741	0.732781	0.0931209	0.994325	1.06793	0.733983	1.26848	0.913574	0.128802	0.0578459	0	0.0849809	2.36845	0.177072	3.2178	0
gene469	LOC109413944	mitochondrial import receptor subunit TOM40 homolog 2%2C transcript variant X2	89.1074	0	0	0	0	0.0691514	0	0.0414022	0	0.0563211	0.0582314	0	0	0.0451284	0	0.0257559	0.0370982	0.0199251	0.0174738	0	0.0470918	0.0639893	0	0.046263	0.069847	0.100258	0.135132	0.122748	0.0510506	0.0670546	0.219765	0.050216	0.0610516	0.0473814	0.143574	0.0892874	0.0328835	0.186308	0.0200857	0.0191149	0	0.0482222	0.0168154	1.86985	0	1.69232	0
gene3865	LOC109622037	uncharacterized LOC109622037	227.102	0.0251224	0	0	0	0	0.0335944	0.047781	0	0.211245	0.134406	0.195327	0.268981	0.208325	0.573536	0.118896	0	0.04599	0.020166	0	0.0362315	0.240006	0.115414	0.106781	0	0.0385681	0.103968	0.0177074	0.0196386	0	0	0.0193176	0	0.0182272	0	0.0618264	0	0.0716708	0.0231803	0	0.0396289	0.0371012	0.0194062	4.92537	0	5.3564	0.023801
gene27472	LOC109431973	dynein intermediate chain 3%2C ciliary-like	62.5424	0.0504402	0.0723072	0.0399385	0.0382174	0.0560813	0.00843129	0.0959339	0.118754	0.0407821	0.0252992	0.0408515	0.042636	0.026142	0.0239903	0.171578	0.247138	0.10388	0.232812	0.052138	0.0636518	0.0278008	0.0496558	0.0267992	0.0708067	0.0580772	0.00869772	0.0444408	0.0197151	0.0873976	0.235025	0.21332	0.327135	0.0457452	0.295715	0.341368	0.238109	0.224843	0.325787	0.188239	0.0298373	0.046557	0.0194817	1.74464	0.111632	2.1839	0.107521
gene2060	LOC109421117	protein gar2-like	140.575	0	0	0	0	0	0.0380983	0.0541868	0	0.110569	0.228638	0.0738379	0.0481646	0	0	0	0.0242769	0.0521557	0.0228696	0	0.0410889	0.0418743	0	0	0.0914151	0.0218694	0.0393022	0.0401627	0.089086	0	0	0.0219074	0	0	0.0417575	0	0	0.121919	0	0	0	0.0631129	0	0.691206	0	2.56577	0
gene23421	LOC109427686	uncharacterized LOC109427686	133.22	0	0	0	0	0	0	0	0	0.0485372	0.0752753	0	0	0.0388914	0.0237936	0.0443925	0.031971	0.103028	0.120471	0	0	0	0.0246243	0	0	0.057601	0	0	0	0	0	0	0.0789209	0	0	0.030779	0	0.160559	0.0346196	0	0	0	0	2.31258	0	2.65695	0.142186
gene13309	LOC109416840	uncharacterized LOC109416840	155.261	0	0	0.0246958	0	0	0.0260673	0	0	0.0756524	0	0	0	0	0.0494477	0	0	0	0	0	0	0	0	0	0	0	0	0	0	0	0	0	0	0	0	0.0639647	0	0.111224	0	0	0	0	0.0602321	1.91729	0	3.9912	0
gene17105	LOC109420920	dynein intermediate chain 2%2C ciliary-like	76.1605	5.51998	0.761637	0.210786	0.306469	0.478797	0.451527	0.781813	0.663624	0.0759665	0.0719979	0.0190239	0.0441221	0.111595	0.049653	0.0578997	0.191814	0.313544	0.919187	0.420851	0.0211726	0.00719246	0.0321166	0.180267	0.0942103	0.0375635	0.0675067	0.0482893	0.107112	0.067833	0.28122	0.353711	0.349975	0.0142019	0.301241	0.441583	0.665304	0.286196	0.803725	0.326576	0.169825	0.0650427	0.0529219	2.42581	0.401705	5.07751	0.519255
gene11808	LOC109415333	EF-hand domain-containing protein 1-like	93.1941	0.0121435	0.0397895	0.00769214	0.0515245	0.046291	0.105551	0.0577401	0.148668	0.0942554	0.0893314	0.00786798	0.00684305	0.0440557	0.0385043	0.0359195	0.248341	0.0889212	0.263188	0.150626	0.00875664	0.0267721	0.0239092	0.0430127	0.0681867	0.00932137	0.0502553	0.0684742	0.0189855	0.0561092	0.51867	0.513568	0.425717	0.0616735	0.382663	0.229119	0.137579	0.346437	0.0560237	0.0426526	0	0	0.046902	3.33629	0.244321	3.27147	0.0115047
gene2329	LOC109424018	EF-hand calcium-binding domain-containing protein 1-like	148.82	0	0	0	0	0	0	0	0	0.101144	0.0209148	0.0202631	0.0176236	0	0	0	0	0.0572517	0	0.155169	0.0225518	0.0459658	0	0	0.0501735	0	0.0431424	0.132261	0	0	0	0	0.0877111	0.113453	0	0.0256553	0	0.089221	0	0	0.0246665	0	0	2.41977	0	3.08126	0
gene8442	LOC109411659	uncharacterized LOC109411659	214.49	0	0	0	0	0	0.0507605	0	0	0.196423	0.0253857	0.0737839	0.25669	0.255755	0.144434	0.651231	0	0.06949	0.0914114	0.0627793	0.273725	0.167375	0.199302	0.107563	0.0608988	0.0874135	0	0	0.0890208	0.0876962	0	0	0	0.0826227	0.0834539	0.062279	0	0.135366	0.0700501	0	0	0	0	2.73791	0	5.75597	0
gene3217	LOC109433371	uncharacterized LOC109433371	92.0324	0.0126903	0	0	0	0	0	0	0	0.0984999	0.0169735	0.0411114	0.0286048	0	0	0.0300296	0	0.034847	0.0611199	0.0314819	0.00915097	0	0.0416431	0.107879	0.050898	0.0194823	0.0175061	0.0357789	0.0595215	0.00977264	0	0.0390323	0.00889776	0	0.0185998	0.0416412	0.0479249	0.0633566	0.0936744	0.0445733	0.0400363	0.187413	0.0980282	1.63925	0	2.37362	0
gene14668	LOC109418339	uncharacterized LOC109418339	274.9	0.244588	0	0	0	0	0.0408838	0	0	0.197755	0.0408925	0	0.0689147	0	0.155107	0	0.260518	0	0.0490833	0	0	0	0	0	0	0	0.0421757	0	0	0	0.0474854	0	0.128619	0	0.0896211	0.050161	0.0923684	0.130833	0	0	0	0.180606	0	2.48584	0.0492099	6.25978	0
gene22041	LOC109426158	CD63 antigen	111.827	0.0348472	0	0	0	0	0	0	0	0.0450796	0	0.0451563	0	0.0541814	0	0	0	0	0	0.0576321	0	0	0	0	0	0.106995	0.0240356	0.0245619	0	0.0536707	0.0270616	0.0267954	0	0	0	0	0.0526401	0	0	0	0	0.0257315	0	1.07392	0	1.77029	0
gene14747	LOC109418427	CD63 antigen-like	115.325	0.0317335	0	0	0	0	0	0	0	0.0821033	0.0848882	0	0	0.0822337	0.0402481	0	0.0540807	0	0.0509457	0.0524826	0	0	0	0	0.101821	0.0487176	0.021888	0.0671018	0.0496134	0.0488752	0.123218	0.0732035	0	0	0.0465108	0.0520643	0.0958732	0.0905315	0	0	0	0.0234324	0	1.10281	0	1.80752	0
gene4869	LOC109407767	uncharacterized LOC109407767	220.453	0	0	0.0198582	0	0	0.0419219	0	0.0295234	0.243332	0.0419309	0.0812485	0.176662	0.0487436	0	0	0.0534267	0	0	0.077772	0.0226063	0.0230385	0.123449	0.222085	0.0251474	0.0481285	0.0864934	0	0	0.0724263	0.0486912	0	0.0219808	0	0	0.0514347	0	0.134155	0	0.0825846	0.0247261	0.046298	0	2.07617	0	5.67069	0
gene14746	LOC109418428	tetraspanin-11-like	59.9984	0	0.0529617	0	0	0	0	0	0	0	0	0	0	0	0	0	0.192823	0.0591791	0	0	0	0	0	0	0	0	0	0.0227856	0	0	0	0	0	0	0.0473807	0	0.0488332	0	0	0	0	0	0	0.975059	0	1.86621	0
gene12017	LOC109415455	potassium/sodium hyperpolarization-activated cyclic nucleotide-gated channel 2-like	48.3975	0	0	0	0	0	0	0	0	0.0202899	0	0	0	0	0	0	0	0	0	0	0	0	0	0	0	0	0	0	0	0	0	0.0241207	0	0	0	0	0.0236928	0.0223727	0	0	0	0	0	1.2444	0	1.78674	0
gene33644	LOC109401780	uncharacterized LOC109401780	75.1105	0.0489637	0.0802178	0.0155078	0	0.0466625	0.0491069	0	0.0230556	0.0158353	0.0327449	0	0.0689798	0	0.108677	0.101382	0.0834446	0.0224087	0.0393037	0	0.0176539	0	0.0160674	0.0520295	0.176744	0.0563771	0.118204	0.120792	0.0956897	0.0565595	0.0570363	0.0753003	0	0.213149	0.0717646	0.0401667	0.0554734	0.0873044	0.067768	0	0.115856	0.054233	0	0.529743	0.118215	2.20477	0
gene32126	LOC109400077	uncharacterized LOC109400077	86.2102	0	0	0	0	0	0	0	0	0.0208044	0	0	0	0	0	0	0.0830525	0	0	0	0	0	0	0	0	0	0	0	0	0	0	0	0	0	0	0	0.0736169	0.0347576	0	0	0	0	0	0.362367	0	2.30094	0
gene3371	LOC109401837	uncharacterized LOC109401837	35.4152	0.115978	0	0.0267145	0	0	0	0	0	0.0204591	0.014102	0.0204939	0	0	0.0735481	0.0686108	0.215619	0.0096506	0.592433	0.0348746	0	0.038741	0.525892	0.0672215	0.109947	0.20233	0.15999	0.208082	0.162038	0.576475	0.655025	0.640474	0.643146	0.122394	0.401783	0.380563	0.175196	0.804613	0.204296	0.0277745	0.0498947	0	0.0732999	1.67995	0.203644	0.925166	0.0199777
gene15079	LOC109418815	IQ and AAA domain-containing protein 1-like	67.3181	0.0181811	0	0	0	0	0	0.00864482	0.0171219	0.0823192	0.0121588	0	0.0102454	0.0141343	0.00576485	0.0591563	0.0542229	0.0416038	0.0072971	0	0.0065552	0.0601246	0.0119322	0.0257593	0.109381	0.0628016	0.0250807	0.0384447	0	0.0210016	0	0.0209703	0.0318691	0.0527642	0.0199856	0.00745732	0.0274644	0.103737	0.0167757	0.0159648	0	0	0	1.28751	0	2.17613	0
gene8719	LOC109411987	uncharacterized LOC109411987	99.1933	0.0410876	0.0168286	0.0130132	0	0	0	0	0	0.0991294	0.100843	0.0311471	0.104191	0.0212948	0.104224	0.141709	0.0525165	0.0188041	0	0	0.0444424	0.0655224	0.107863	0.0291068	0.0164793	0.0577164	0	0.0144802	0.0427182	0.0632821	0.0159539	0.015797	0	0	0	0.0337057	0.0412745	0.0732609	0.0189557	0	0.0162033	0	0	1.50871	0.0661332	3.0731	0
gene7380	LOC109410535	DC-STAMP domain-containing protein 2-like	37.2157	0	0.0429695	0	0	0	0.043841	0.0748255	0.0617497	0.00848235	0.0263102	0.0169936	0.00738995	0.02039	0.124745	0.0155161	0.0111745	0.0600173	0.0210534	0	0	0.00963723	0.00860667	0.0185801	0	0.0100663	0	0	0	0	0.020368	0	0	0.0190293	0.0192207	0.0215157	0.0594297	0.00935309	0.0242004	0	0	0	0	0.455739	0	0.868091	0.0248484
gene22413	LOC109426561	DC-STAMP domain-containing protein 2-like	36.9718	0	0.0214847	0	0	0	0.0613774	0.174593	0.0617497	0.00848235	0.0438503	0.0169936	0.00738995	0.0475766	0.241173	0.0155161	0.0111745	0.0120035	0.0421069	0	0.0189129	0.0289117	0.00860667	0	0	0.0100663	0	0.0184866	0	0.0201978	0.020368	0	0	0	0	0	0.0198099	0.00935309	0.0484008	0	0	0	0	0.472937	0	0.847902	0
gene16781	LOC109420538	sperm flagellar protein 1-like	185.299	0.133986	0.219511	0	0	0.383067	0.0895852	0	0	0.0433323	0	0	0	0	0	0	0	0	0.107552	0	0	0	0	0	0	0	0.0462081	0	0	0.0515905	0.208101	0	0.0469719	0.145817	0.0981896	0	0	0.238903	0	0	0	0	0	1.14211	0	2.88769	0
gene20903	LOC109424952	dyslexia susceptibility 1 candidate gene 1 protein homolog	36.0902	0.604499	0.293439	0.0425459	0.0135708	0.0568977	0.374238	0.149037	0.105422	0	0.0598909	0.0290123	0	0.0696217	0.0425942	0	0.267088	0.102465	0.287549	0.148112	0	0	0	0.0158605	0.0718374	0	0.0926555	0	0	0.12069	0.295574	0.464823	0.565123	0.0324878	0.590664	0.550991	0.219834	0.479043	0.392504	0.216256	0	0.0826608	0.138357	1.60017	0.270272	1.96458	0.212112
gene5514	LOC109408490	protein disulfide-isomerase-like	106.164	0	0	0	0	0	0	0	0	0	0	0	0	0	0	0	0	0	0	0	0	0	0	0	0	0	0	0	0	0	0	0	0	0	0	0	0	0.0941021	0	0	0	0	0	2.42238	0	1.77725	0
gene9715	LOC109413050	uncharacterized LOC109413050	65.184	0	0	0	0	0	0	0	0	0.055455	0.0229344	0.0222197	0	0	0.0326217	0.0304318	0	0	0	0	0	0	0	0	0.0275092	0	0	0	0	0	0	0	0	0.0124408	0	0	0	0.0244591	0	0	0	0	0	1.74272	0	2.86405	0
gene14216	LOC109417812	tetratricopeptide repeat protein 12-like	65.6527	0.197636	0.132459	0.11381	0.0544525	0.11415	0.0720779	0.273375	0.135362	0.0581067	0.0480621	0.0349233	0.0708728	0.0372474	0.0797571	0.159435	1.39319	0.0657819	0.490357	0.282289	0.0906916	0.0264072	0.07075	0.0127279	0.0288246	0.0413745	0	0.0633196	0.0280902	0.207542	0.892976	0.787483	0.844029	0.0391069	0.763674	0.869596	0.773513	0.679159	0.729434	0.126214	0.0283417	0	0.0277577	1.63755	0.202433	1.79784	0.0340438
gene2588	LOC109426384	cilia- and flagella-associated protein 44-like	35.4942	0.0347945	0.0213766	0.0137751	0.0079089	0.0248695	0.0465284	0.0206803	0.0655349	0.0478247	0.00581728	0.00845402	0.0147055	0.0090166	0	0.015438	0.151949	0.0358291	0.013965	0.0215794	0.00940887	0.00319624	0.0171267	0.0277298	0.0279107	0.0233699	0.0389989	0.0367872	0.0407993	0.15407	0.56068	0.869535	0.518416	0.00946675	0.659777	0.30684	0.200387	0.859256	0.0802621	0	0.0240127	0	0.0537552	2.20734	0.231017	1.50984	0.00412055
gene34453	LOC109402642	uncharacterized LOC109402642	60.894	0.920223	0.196645	0.228093	0.048503	0.127098	0.401267	0.418527	0.226073	0	0.0267568	0	0	0	0	0	0	0.0732433	0.224814	0.0330851	0.028851	0	0.0787749	0.0566864	0	0	0	0	0	0	0.124283	0.0615301	0	0	0.0293205	0.196928	0.574167	0.142678	0.479919	0.281059	0	0	0.0618122	1.36419	0.676181	2.64848	0.492769
gene31355	LOC109399395	dnaJ homolog subfamily B member 13-like	109.898	0	0	0	0	0	0	0	0	0.117544	0.141786	0.039248	0.051203	0.0313948	0.0384144	0.0537534	0	0.0554459	0.0729369	0.0500915	0.0873618	0.022258	0.0596333	0.0858243	0.048591	0	0.0417816	0	0	0.0466484	0	0.0232894	0	0.0878992	0.0221959	0	0.0686289	0.0864068	0.0279464	0.0265956	0	0	0	1.86682	0	3.14726	0
gene7592	LOC109410801	serine/threonine-protein kinase MRCK beta-like	73.0742	0.0403522	0.0165274	0	0	0.0128186	0	0	0	0.0652514	0.0674646	0.0392174	0.0113696	0.0104568	0.0383845	0.0596795	0	0.0369351	0.0323912	0	0	0.10379	0.0794492	0.0285858	0.0323688	0	0	0	0	0	0	0.0465426	0	0.0292769	0	0.0993071	0	0	0.0372329	0.0177166	0.0159132	0	0.140268	1.62723	0	2.26737	0.0191149
gene27776	LOC109432356	uncharacterized LOC109432356	85.1386	0.165286	0.0386843	0	0.0286247	0	0.0631502	0.0224545	0	0.0763643	0.0631636	0.0152988	0	0	0.0149739	0.0139687	0.160961	0.0432256	0.0568616	0	0.0170268	0	0	0	0.132585	0.0543747	0	0	0	0.036367	0.091684	0.163408	0.248335	0.0513946	0.103823	0.09685	0.0178343	0.25261	0.108935	0	0	0	0	0.882511	0.114016	2.10828	0.0447407
gene20303	LOC109424337	EF-hand calcium-binding domain-containing protein 1-like	91.3157	0.0711284	0	0	0	0	0	0	0	0.0230036	0	0	0	0	0	0	0	0	0	0	0	0	0	0	0	0	0	0	0	0.0821626	0.0552368	0	0	0	0.0521253	0.0583492	0	0.0507299	0	0	0	0	0	0.932781	0	2.24471	0
gene21598	LOC109425616	uncharacterized LOC109425616	124.729	0	0	0	0	0	0	0	0	0.0653786	0	0	0	0	0	0	0	0	0.0811358	0	0	0	0	0	0	0	0.139435	0.142488	0	0	0	0.0777223	0	0.220005	0.296291	0	0	0	0	0	0	0	0	2.41909	0	3.07314	0
gene1007	LOC109410250	uncharacterized LOC109410250	31.8497	0	0	0.0564355	0	0	0	0.0847251	0.0419516	0	0	0	0	0.0230876	0	0	0	0	0	0.073674	0	0	0	0.0315574	0.0714671	0	0.015363	0.0627974	0	0.0857625	0.242159	0.154142	0.124936	0	0.130582	0.146174	0.0168231	0.0953148	0.0822066	0.0391165	0.0878373	0	0.120438	0.905495	0.161327	1.54299	0.0211019
gene26794	LOC109431267	dynein intermediate chain 3%2C ciliary-like	94.9852	0.0551917	0.0565132	0.0437007	0.00836348	0.0262989	0.0830296	0.0524854	0.0259881	0.133871	0.0830472	0.0268198	0.0466522	0.114418	0.0350002	0.220392	0.576108	0.0884065	0.210439	0.0570493	0.029849	0.0709791	0.0724444	0.00977456	0.166021	0.0847307	0.00951704	0.0486271	0.0647166	0.053128	0.225019	0.403171	0.744926	0.11012	0.465133	0.486714	0.427284	0.600295	0.712953	0.0848114	0.0761786	0.0509426	0.0426336	3.0399	0.233191	3.5154	0.0653609
gene33100	LOC109401178	chromosome-associated kinesin KIF4-like	25.9967	0	0	0	0	0	0	0	0	0	0	0	0	0	0	0	0	0	0	0	0	0	0	0	0	0	0	0	0	0	0	0	0	0	0	0	0	0	0	0	0	0	0	0.109913	0	1.9784	0
gene373	LOC109402734	mitochondrial import inner membrane translocase subunit Tim23-like	44.9281	0	0	0	0	0	0	0	0	0	0	0	0	0.0333424	0	0	0	0	0	0	0	0	0	0	0	0	0	0	0	0	0	0	0	0	0	0	0	0.0917671	0	0	0	0	0	0.210917	0	0.841816	0
gene34634	LOC109402808	EF-hand domain-containing family member C2-like	71.1825	0.260409	0.042663	0.0263925	0.0378826	0.105886	0.132326	0.108962	0.0882855	0.1078	0.0348301	0.0134979	0.0234792	0.0323913	0.0726617	0.0677838	0.177517	0.0286029	0.100336	0	0.0450673	0.0459288	0.102543	0.118064	0.225599	0.119934	0.0359231	0.0807612	0	0.048129	0.347832	0.53664	0.47472	0.0151148	0.61831	0.341796	0.236024	0.490321	0.33639	0.0823191	0	0.0615323	0.0160925	2.25391	0.108978	2.50151	0.0197369
gene35965	LOC109404253	MORN repeat-containing protein 3-like	55.418	0	0	0	0	0	0	0	0	0	0	0	0	0	0	0	0	0.036792	0	0	0	0	0	0	0	0	0	0	0	0	0	0	0	0	0	0	0	0.0286683	0	0	0	0	0.0310499	0.843408	0	1.67073	0
gene11400	LOC109414890	uncharacterized LOC109414890	189.13	1.68977	1.62616	1.02781	0.643272	2.00047	2.41607	1.65145	1.99886	0.323365	0.590421	0.386425	0.410225	0.154553	0.0333722	0.11415	0.366206	0.433513	0.535068	0.459389	0.00632457	0	0	0.149118	0.379917	0.336623	0.405321	0.329378	1.10386	1.1212	1.67555	1.49491	1.87562	0.366918	2.93955	2.34311	2.62331	2.18315	3.19663	1.20914	1.60032	1.80264	1.31206	6.44445	2.71513	7.70061	1.33782
gene18628	LOC109422617	EF-hand domain-containing family member C2-like	49.9813	0.140142	0.0382661	0.0118362	0.0339783	0.0593581	0.0937012	0.13327	0.114381	0.0725172	0.081225	0.0242135	0.0210593	0.029053	0.0296241	0.0497436	0.111455	0.00855165	0.0449975	0	0.0269484	0.0137318	0.091975	0.119133	0.202349	0.107574	0.0579974	0.0592672	0.0146069	0.0143896	0.311983	0.409491	0.399591	0.0135571	0.33549	0.229927	0.254038	0.359826	0.370685	0.0574273	0	0.0137976	0.014434	1.43963	0.0827082	1.84098	0.0177028
gene25441	LOC109429853	MORN repeat-containing protein 3-like	36.2423	0.0531821	0	0	0	0	0	0	0.0500838	0	0.00889149	0.00585781	0	0	0	0	0.0657094	0.0243393	0.00853798	0	0	0.0195413	0.0139613	0.158234	0.0426604	0.00693988	0.0550231	0.0123701	0.0241126	0.016382	0.0483212	0.0171754	0.0868821	0.0463026	0.0584605	0.0109068	0.0100421	0.0443785	0.0098142	0	0	0	0.0340975	0.488203	0.0107	0.973034	0.0629811
gene20659	LOC109424679	dynein heavy chain 12%2C axonemal	67.923	0.0733966	0.0512816	0.0601665	0.0287868	0.0164582	0.0259804	0.0451632	0.0772525	0.122875	0.0202113	0.0195815	0.030412	0.00447527	0.049283	0.0370351	0.746822	0.0395185	0.0901073	0.0249915	0.0186799	0	0.00850061	0.0917556	0.090045	0.147477	0.0268014	0.00912942	0.0253127	0.0731459	0.43084	0.551097	0.585756	0.0172285	0.482506	0.338238	0.327727	0.403385	0.235038	0.0189557	0.00340525	0.00956415	0.043356	3.57834	0.184154	3.1039	0.00409036
gene6787	LOC109409863	uncharacterized LOC109409863	45.4414	0.068317	0	0	0	0	0	0	0	0	0	0.0663958	0	0.0354071	0.0649856	0	0.0582133	0	0.0274194	0	0	0	0	0.120991	0.0548009	0	0.0471213	0	0.160214	0	0	0.0525316	0	0	0	0	0.0773996	0.0487248	0	0.059989	0	0	0	0.0895912	0.219921	30.3152	0.0323618
gene36758	LOC109405175	mitochondrial thiamine pyrophosphate carrier-like	70.9808	0.133917	0.0438795	0.0848281	0.0487035	0.204197	0.125354	0.15282	0.479237	0.0692959	0.0537347	0.0173534	0.0603716	0.0416436	0	0.110913	0.0912891	0.0245153	0	0	0	0	0.0175779	0	0	0	0	0	0	0.0618766	0.0415988	0.144164	0.112674	0	0.157022	0.0219713	0.0809178	0.171921	0	0.0235184	0	0.0791084	0.103446	0.91322	0.107774	2.24711	0.0253746
gene1203	LOC109411980	uncharacterized LOC109411980	40.445	0	0	0	0	0.00971219	0.0204419	0.0290743	0.0287923	0.0296632	0.0204462	0.00990456	0.0344574	0.031691	0.0193884	0.0542605	0.0260518	0	0.0981666	0.012641	0.0110233	0.0337019	0.0401306	0.043317	0.073574	0.222949	0.0421757	0.0323244	0.0477997	0.0588606	0.0118714	0.0470183	0	0.144184	0	0.0125403	0	0.0218055	0.014105	0	0.0241138	0	0	0.491154	0	1.20018	0
gene21052	LOC109425088	glucose-6-phosphatase 3-like%2C transcript variant X4	40.8677	2.9483	2.01898	0.978249	0.70916	1.35779	1.99214	1.75048	3.23194	0.0403601	0.083458	0.0101072	0.0175811	0	0.0692476	0.0553705	0.770959	0.84243	1.41497	0.709478	0.0112488	0	0.0307137	0.0221016	0.337856	0.419097	0.236712	0.164928	0.231693	0.876945	2.25324	2.09913	3.66406	0.158451	4.03543	4.26133	4.46547	1.96926	4.62523	2.35603	1.00889	0.426195	0.361501	2.40372	1.38096	3.7023	1.30055
gene16703	LOC109420440	dynein heavy chain 2%2C axonemal-like	22.3302	0	0	0	0	0	0	0	0	0	0.0342882	0	0	0	0	0	0	0.0156433	0	0	0	0	0	0.0363212	0.0274185	0	0	0	0	0	0.0132721	0	0.0479318	0	0	0	0	0.0121892	0	0	0	0	0	0.470664	0	0.986618	0
gene4005	LOC109403280	IQ and AAA domain-containing protein 1-like	78.9792	0	0	0	0	0	0	0.0264444	0	0.131903	0.0495914	0.0240231	0.0417874	0.0240204	0.00587821	0.027418	0.071086	0.0254532	0.0520841	0.0153301	0.0066841	0.0204356	0.0365006	0.157595	0.126403	0.0213455	0.0127869	0.0130669	0.028984	0.0499673	0.0863803	0.0356378	0.0194974	0.094153	0.0339644	0.0228119	0.0280044	0.0661103	0.0171055	0.0162787	0.0146218	0.0136891	0.0143205	2.07257	0.0149196	2.54712	0
gene8580	LOC109411748	dynein heavy chain 2%2C axonemal-like	47.6959	0.0302171	0	0	0	0.019198	0.0404073	0	0	0.0488625	0.0303119	0.00978912	0	0.0313217	0.047906	0.017876	0.0643705	0.0553166	0.0727669	0.0499747	0	0.0222061	0	0.0214061	0.0969554	0.0463896	0.0208421	0.0319476	0.0472426	0.0465396	0.011733	0.0348527	0.0317799	0.0328854	0.0553604	0.0371823	0.0456459	0.0215514	0.0278812	0	0.0119164	0.0223126	0.0350125	0.960952	0	1.81418	0
gene27490	LOC109432059	RIB43A-like with coiled-coils protein 2	96.9882	0.109579	0.0538571	0.0277645	0.013284	0.0835429	0.146532	0.208411	0.0825557	0.127579	0	0.0141996	0.0246998	0.0113584	0.041694	0	1.8301	0.180539	0.79164	0.27184	0	0	0.0431497	0.0621011	0.0351596	0.0336452	0.060465	0	0	0.118139	1.54876	1.49982	1.35222	0.0318012	0.995757	0.683173	0.430376	1.21919	0.626868	0.307906	0.0518559	0.0970967	0.0846456	2.09805	0.370385	3.72804	0.020763
gene29321	LOC109397083	uncharacterized LOC109397083	37.3155	0	0	0	0	0	0	0	0	0	0	0.0188743	0	0	0.0554203	0	0	0	0.0233835	0	0	0.0428153	0	0.0206364	0	0	0	0	0	0	0.0452445	0	0	0	0	0	0.0660071	0	0	0	0	0	0	0.0382021	0.0468877	21.3686	0.0275985
gene33887	LOC109402073	uncharacterized LOC109402073%2C transcript variant X2	130.894	0	0	0	0	0	0	0	0	0.180804	0.140203	0	0.571008	0.108655	0.24374	0.351401	0	0.0959468	0	0	0.100784	0.128388	0	0.0990103	0.0560564	0	0.0482009	0	0	0	0	0	0	0	0	0.0859903	0.0527819	0.0498411	0	0	0	0	0	1.16846	0	3.01222	0
gene25054	LOC109429513	coiled-coil domain-containing protein 39-like	59.3751	0.235888	0.169808	0.104142	0.0216639	0.172575	0.157719	0.203929	0.289463	0.0970945	0.0908271	0.078734	0.0483372	0	0.0498635	0.00845747	0.164456	0.314056	0.424604	0.342837	0.00515452	0	0.0703696	0.415232	0.550456	0.471877	0.354988	0.347645	0.46379	0.335786	0.938135	0.939899	0.726724	0.119283	0.729919	0.416335	0.340136	0.683155	0.309992	0.433096	0.343909	0.353643	0.414126	2.33415	0.709537	2.38239	0.135443
gene25188	LOC109623373	carbonic anhydrase 1-like	66.3243	0.0262678	0	0	0.0318439	0	0	0	0	0.0679619	0.0351335	0.0680775	0	0	0	0	0.111915	0	0.105427	0.0651646	0	0	0.068958	0	0.0842834	0	0.0181181	0.0185147	0.020534	0	0.040798	0.0201983	0.0368351	0	0.173249	0.0430968	0.13888	0.0187346	0	0.069197	0	0	0.0405819	1.34346	0	2.28473	0.0248861
gene4828	LOC109407742	protein arginine N-methyltransferase 1 pseudogene	68.3443	0	0	0.0280251	0	0	0	0	0	0.0715427	0	0	0	0	0.0701423	0.0392601	0.282747	0	0.177571	0.0182928	0	0	0.0435547	0.109697	0.798517	0.577337	0.915487	0.873163	0.674416	1.17544	0.446655	0.476281	0.43429	1.23584	0.421495	0.145176	0.0334166	0.441766	0.163291	0.0388495	0	0	0.153792	2.5674	0.0712117	1.89003	0.0209579
gene7857	LOC109411049	dynein beta chain%2C ciliary-like	48.251	0.423348	0.312728	0.114928	0.0756079	0.157298	0.185756	0.213876	0.32927	0.0916839	0.0985855	0.0893908	0.0117152	0.0107747	0.025169	0.0793827	0.217409	0.0657364	0.174464	0.0625139	0.0068142	0.0208334	0.0632588	0.196812	0.0667054	0.0739873	0.0703933	0.04396	0.03989	0.103335	0.410954	0.337155	0.2531	0.0266017	0.221603	0.128682	0.12419	0.312722	0.176129	0.029872	0.0760223	0.02512	0.0554769	2.31788	0.0517138	1.95932	0.13429
gene32512	LOC109408298	protein D2-like	44.1434	0.471387	0.029703	0	0	0.0921503	0.0727331	0.241378	0.307332	0	0.048499	0.117469	0.0408669	0.338274	0.275939	0.193061	0.0926935	0.0663799	0	0	0	0	0.0237977	0	0.0581732	0.0278337	0	0	0	0	0	0.0557644	0.279663	0	0.106292	0.0297458	0.164325	0	0.13383	0	0.0571987	0.133876	0.05602	0.30909	0.0583637	5.94493	0.82448
gene2667	LOC109427172	UPF0605 protein GA14893	397.226	1.46614	0.880732	0.464356	0.177738	0.357072	0.359438	0.557701	0.87446	0.742857	0.637321	0.712456	0.413099	0.506578	0.201449	1.27211	0.0416437	0.044733	0.117689	0	0.0881029	0.0897871	0.0481113	0.38083	0.588038	0.43141	0.219107	0.327245	0.248324	0.0940882	0.170786	0.0751584	0.188463	0.230477	0.196981	0.120273	0.14765	0.331131	0.293108	0.27894	0.0385457	0	0.0377515	6.47312	0.314647	14.2758	1.68998
gene16701	LOC109420439	dynein heavy chain 2%2C axonemal-like	44.312	0	0.0121636	0	0	0	0	0	0	0.0576275	0	0.00962092	0	0.0307835	0	0.0175689	0.0379587	0.0271831	0.0238389	0.049116	0	0	0	0	0.0357336	0.0227963	0.040968	0.0104662	0	0.02287	0.0115314	0.0228359	0.0208226	0.0107734	0.0108818	0.0121811	0.0448616	0.0211811	0	0	0.0117116	0	0.0114703	1.08075	0	1.72586	0.0281359
gene19812	LOC109423874	uncharacterized LOC109423874	255.335	0.0349882	0	0	0	0.0444585	0.116968	0.133091	0	0.452621	0.444575	0.362713	0.611211	0.852279	0.865334	0.538162	0	0.128102	0.224684	0.0578654	2.67438	2.33982	0.734807	0.817937	0.477123	0.778857	0.458526	0.221952	0.218808	0.13472	0.24454	0.107615	0.0245319	0.761556	0.153844	0	0.0528532	0.349359	0.0645671	0.122892	0	0.0258357	0.108109	3.62482	0	6.32882	0.16574
gene2883	LOC109430613	serine/arginine repetitive matrix protein 1-like	266.096	0.112723	0	0	0	0	0	0	0	0.401012	0.150769	0.0730353	0	0.116843	0.357421	0.0333427	0.144078	0	0	0.372855	0	0.0828383	0.554849	0.958247	0.497318	1.47095	0.505375	0.397262	0.352471	0.347226	0.0875383	0.346709	0.0790353	0.613384	0.330429	0.0924707	0	0.241188	0	0.296945	0	0	0	2.32825	0.0907175	9.54417	0
gene28283	LOC109432859	uncharacterized LOC109432859	111.804	0.118493	0	0	0	0.0451697	0.0316905	0.0901463	0	0.168616	0.0633945	0.0307096	0.106837	0	0	0	0.0605812	0.151843	0.0570695	0.0979851	0	0	0.0311067	0	0	0	0	0	0	0	0	0	0.0332324	0.0515825	0.0173672	0.0777633	0.0357991	0.0507068	0.0874666	0.0832388	0	0	0	2.42412	0	3.50233	0
gene36462	LOC109404778	uncharacterized LOC109404778	256.003	0.0266731	0	0.0337916	0.0323354	0.0677855	0.196175	0	0	0.483075	0.445947	0.380205	0.706447	0.926212	1.16713	0.757414	0.0454567	0.0976577	0.0428217	0.0441135	3.38518	2.05817	1.01532	0.434596	0.32094	0.675656	0.459941	0.282007	0.333614	0.184866	0.186424	0.12306	0.130912	0.735387	0.039094	0	0.0402924	0.30438	0.246112	0.0468432	0.126225	0.13787	0	4.68723	0	8.23287	0.0758106
gene25216	LOC109623396	10 kDa heat shock protein, mitochondrial pseudogene	166.404	0	0	0	0	0	0.845596	0	0	0.136338	0.0939751	0	0	1.85715	0	0.166262	0	0.128622	0	0	0	0	0	0	0	0	0	0	0	0	0	0	0	0	0	0	0	0.100223	0.129659	0	0	0	0	3.13278	0	2.70406	0
gene33605	LOC109401734	uncharacterized LOC109401734	123.462	0	0	0	0	0	0	0.229884	0	0.07818	0	0.078313	0	0	0	0	0	0	0	0	0.0871582	0	0	0	0	0	0	0	0	0	0	0.0929406	0	0	0	0	0	0.0862054	0	0	0	0	0	1.86246	0	3.30274	0
gene24962	LOC109429412	glucose-6-phosphatase 3-like%2C transcript variant X1	43.7263	3.62723	2.15636	0.959769	0.732871	1.77943	2.40476	2.38691	3.02676	0.0593965	0.0409407	0.00991625	0.017249	0	0.0873507	0.0724327	0.625982	0.938587	1.65852	0.772012	0.0110363	0	0.0502225	0.0650522	0.626118	0.458172	0.253353	0.204963	0.275173	1.35539	1.87789	2.50668	4.17431	0.155458	4.76674	4.3566	4.77415	2.25953	4.27406	2.5803	1.52096	0.621566	0.543831	2.75973	1.84755	4.35474	1.39198
gene8940	LOC109412170	WD repeat-containing protein 63-like	28.3598	0.0141326	0.0173652	0	0	0.0134684	0.0236232	0.0201595	0	0.0411356	0.0141769	0.00915679	0.015928	0.0036623	0.00896231	0.00418033	0.361275	0.0129359	0.0907553	0.0350599	0.00509551	0	0.023188	0.0400467	0.0340097	0.0108483	0.0292437	0.0199226	0.0276193	0.0598584	0.285353	0.282546	0.183317	0.00512685	0.269279	0.150715	0.149441	0.342707	0.182562	0.0744589	0.0111466	0	0.0272924	1.43172	0.10805	1.02255	0
gene32275	LOC109400255	dynein beta chain%2C ciliary-like	45.8607	0.419162	0.283578	0.0912702	0.0907397	0.139098	0.211445	0.14414	0.234378	0.0944085	0.0550624	0.0751703	0.00949039	0.0096983	0.0166134	0.0509225	0.287012	0.059948	0.190764	0.0727275	0.00674682	0.0220025	0.0700019	0.157748	0.0870604	0.081874	0.0477556	0.0580338	0.021942	0.0994313	0.276104	0.343894	0.204676	0.0263387	0.179643	0.148901	0.158296	0.328315	0.155394	0.0230041	0.056084	0.0234899	0.0520374	2.05202	0.0933692	1.84249	0.125871
gene27988	LOC109621335	carboxypeptidase B-like	48.2288	0	0	0	0	0	0	0	0	0.066283	0	0	0.00962446	0.0442589	0.0433237	0.0101038	0	0	0.0548388	0	0.0246317	0	0	0	0.0137002	0	0	0	0	0.026305	0	0	0	0	0	0.0140107	0	0.0243624	0	0	0	0	0.0527725	0.0111989	0	36.4545	0.0323618
gene23031	LOC109427196	uncharacterized LOC109427196	251.477	0.0806416	0	0	0	0	0.0539183	0	0	0.469445	0.350543	0.0783738	0.181772	0.188076	0.204558	1.26422	0	0.147626	0.032366	0.133369	0.523356	0.592622	0.31755	0.171382	0.0646872	0.154752	0	0.11368	0.220637	0.155253	0.0626246	0	0	0.146271	0.0295485	0.0661532	0.0609086	0.258817	0.0744078	0	0	0	0	2.48522	0	6.54854	0
gene38062	LOC109406546	globin-like	104.526	0	0	0.0698839	0	0	0	0	0	0.07136	0	0.0714814	0	0.085768	0.139926	0.0652665	0	0	0	0	0	0.0810758	0	0	0	0.0846857	0	0	0	0.0849596	0	0	0	0	0	0.0452516	0	0	0.101796	0	0	0	0	0.940422	0	0.551974	0
gene22773	LOC109427001	10 kDa heat shock protein, mitochondrial-like	199.915	0	0	0	0	0	1.69362	0	0	0.240943	0.099646	0	0	2.27811	0	0.0881473	0	0	0	0	0	0	0.0977895	0	0	0	0	0	0	0	0	0	0	0	0	0	0	0	0	0	0	0	0	3.61493	0	4.3582	0
gene4249	LOC109406148	speckle-type POZ protein-like	39.283	0	0	0.0228252	0	0	0.0481855	0	0	0.0466146	0.10844	0.140082	0.0101528	0.0186755	0.0457022	0.0959268	0.0614092	0	0.0289247	0.0148986	0.0909437	0.0794419	0.130069	0.0957248	0	0.0138298	0	0.0126991	0.0140841	0.0277491	0.0279831	0	0.0252649	0.0130719	0.0792203	0	0	0.0642497	0	0	0	0.0133038	0	0.129951	0	1.61173	0
gene28751	LOC109433278	SRSF protein kinase 1-like	47.0787	0	0	0	0	0	0.0117763	0	0	0.0683544	0.0117788	0.0114118	0	0.0182568	0	0	0.0150081	0	0	0	0.0254014	0	0	0	0	0	0.0242969	0.0124144	0	0	0.0410336	0	0	0	0	0	0.0133031	0	0	0	0	0	0	1.80162	0	2.15557	0
gene31578	LOC109399546	mitochondrial import inner membrane translocase subunit Tim23-like	36.6057	0	0	0	0	0	0	0	0	0	0	0	0	0	0	0	0	0	0	0	0	0	0	0	0	0	0	0	0	0	0	0	0	0	0	0	0	0	0	0	0	0	0	0.226666	0	0.425728	0
gene35576	LOC109403819	uncharacterized LOC109403819	79.2236	1.06605	0.279443	0.135055	0.051694	0.135459	0.370644	0.446061	0.0803153	0.0551632	0.0285171	0	0.0961179	0	0	0	0	0.156124	0.308062	0.105785	0.0307491	0	0.0279858	0	0	0	0	0	0	0	0.132459	0.0655782	0	0.0618764	0.0312495	0.279846	0.418696	0.152065	0.511492	0.29955	0.13453	0	0.0658788	1.14638	0.652032	2.56014	0.605986
gene15218	LOC109407742	protein arginine N-methyltransferase 1 pseudogene	51.2663	0	0.0391839	0	0	0	0	0	0	0.0464103	0	0.0309929	0	0	0.0151673	0.0424473	0.26494	0	0.153589	0.0197778	0	0	0.0156968	0.0508295	0.709858	0.477333	0.626878	0.708035	0.168269	0.736735	0.371473	0.331037	0.301851	0.850287	0.350548	0	0	0.409396	0	0.25202	0	0	0.0554257	1.47416	0.0384963	1.50959	0.249252
gene3074	LOC109431550	WD repeat-containing protein 63-like	28.1274	0.0153274	0.00627776	0	0	0.014607	0.0153722	0.0364396	0	0.0446132	0.00512516	0.00993091	0	0.00397192	0	0.00453373	0.274272	0.0140295	0.0615174	0.0506985	0.00552629	0	0.0251484	0.0434322	0.0491799	0.0470615	0.0528599	0.0216069	0.0239634	0.0885257	0.24401	0.318218	0.198815	0.0166808	0.230265	0.144597	0.104191	0.289691	0.11314	0.0403768	0	0	0.0177598	1.40703	0.135687	0.890734	0
gene8258	LOC109411511	myosin heavy chain%2C striated muscle-like	33.2626	0	0	0.0150071	0	0.0602079	0.0158404	0.0150198	0.0148741	0.0633394	0.0369689	0.0204668	0.0311512	0.0245574	0.00500803	0.0186873	0.235522	0.216852	0.050713	0.261214	0.0341677	0	0	0.0503496	0	0.0181856	0.0408525	0.0111325	0.00617334	0	0.0306637	0.00607242	0.0221482	0	0	0.0194349	0.0119294	0.0281618	0	0.00693445	0.00622861	0.0233253	0	0.702678	0.0127109	0.789365	0.00748176
gene18904	LOC109422869	calcium uptake protein 3, mitochondrial pseudogene	24.2869	0	0	0	0	0	0	0	0	0	0	0	0	0.0122377	0	0	0	0.0432256	0	0	0	0	0	0	0	0	0	0	0	0	0	0	0	0	0	0	0	0.0673627	0	0	0	0	0	1.33151	0	0.690644	0
gene33333	LOC109401427	WD repeat-containing protein 66-like	52.727	0.0666318	0	0.0317347	0.0911013	0.0477446	0.0167485	0	0.0627499	0.0648101	0.134017	0.0324602	0	0	0.0317707	0.0592758	0.128069	0.0458567	0.0402151	0	0	0.0184085	0.03288	0	0	0	0	0.0176561	0.0391634	0	0.0972648	0.211878	0.351268	0.0363487	0.385501	0.349334	0.491918	0.0893288	0.184905	0	0.0987851	0.0369937	0	0.996344	0.141116	1.17615	0
gene5125	LOC109408089	mitochondrial thiamine pyrophosphate carrier-like	43.8147	0.0245747	0	0.0778328	0.0148957	0.0312263	0.016431	0.140218	0.254573	0.0317907	0.0164345	0.0159224	0.0553931	0.0127365	0	0.014538	0.0418805	0.0224937	0	0	0	0	0.0161283	0	0	0	0	0	0	0.056774	0.0381684	0.132275	0	0	0.144073	0.0201595	0.0371225	0.12269	0	0.021579	0	0.0725848	0.0189831	0.515638	0.0197773	1.11602	0.0232821
gene13946	LOC109417519	uncharacterized LOC109417519	63.1471	0	0	0.045304	0	0	0	0.297291	0.303093	0.046261	0.0478301	0.0463397	0	0.0741351	0.2041	0.0846214	0.0304717	0.0981965	0.0574106	0.0591425	0.0515736	0	0	0.025333	0.286854	0.411748	0.0246655	0.0252056	0.111818	0.0275386	0.0833123	0.10999	0.0501465	0.181618	0.209652	0.0880066	0	0.0510098	0.065992	0.219808	0.112819	0.237653	0.082871	0.633101	0.316573	2.17451	0
gene3049	LOC109431193	uncharacterized LOC109431193%2C transcript variant X1	26.163	0.0865737	0.0500593	0.07742	0.0370418	0.0194129	0.0578846	0.0339	0.0239794	0.0527035	0.0408684	0.0395949	0.0172185	0.0211149	0.0484424	0.0723046	0.169237	0.0372906	0.0940209	0.046323	0.0257058	0.0673641	0.0868984	0.252534	0.0898708	0.0742725	0.049176	0.0610212	0.0875811	0.0745128	0.249152	0.33285	0.253515	0.0147794	0.264973	0.133684	0.123085	0.337786	0.108075	0.0268307	0.0321328	0.0300833	0.0904782	1.30563	0.303282	1.28179	0.0771954
gene23746	LOC109428119	uncharacterized LOC109428119	49.9684	0	0	0	0	0	0	0.297291	0	0	0	0	0	0	0	0	0	0	0	0	0	0	0	0	0	0	0	0	0	0	0	0	0	0	0	0	0	0	0	0	0	0	0	0.994149	0	1.59492	0
gene29318	LOC109397085	uncharacterized LOC109397085	45.036	0	0	0	0	0	0	0.297291	0	0	0.183475	0.0592527	0.0515341	0.0473968	0.0869913	0	0	0	0.0734086	0	0	0	0	0.161961	0	0	0	0	0	0.0704251	0	0	0.0641204	0.0663507	0.0670183	0	0	0.0652242	0	0.0803027	0.144258	0.0675282	0.211928	0.119929	0	16.9292	0
gene25409	LOC109429687	globin-like	50.7355	0	0	0.0682857	0	0	0	0.297291	0	0	0.0720932	0	0	0.0838066	0	0	0	0	0	0	0	0.0792217	0	0	0	0	0	0	0	0	0	0	0	0	0	0.0442168	0	0	0	0	0.085025	0	0	0.494801	0	0.871259	0
gene10547	LOC109622504	mitochondrial import receptor subunit TOM40 homolog	99.6337	0.0589904	0	0	0	0	0	0.297291	0	0.19078	0	0	0	0.122293	0.0374092	0.0174489	0	0.0269975	0	0	0.021269	0.0867022	0.0387153	0.062684	0.0236598	0.158485	0.0203442	0.166317	0.0922279	0.0908555	0.137432	0.0680401	0.0620414	0.106999	0.259381	0.169372	0	0.168292	0.0816454	0.0258997	0	0	0	2.39817	0.0474744	2.9741	0
gene33301	LOC109401358	uncharacterized LOC109401358	125.449	0.0213034	0	0	0	0.0135348	0.0569753	0.297291	0	0.26181	0.0854811	0	0.192078	0	0	0.0252056	0.0544584	0.331491	0.0171005	0.405177	0	0	0.0419442	0	0	0	0	0	0	0	0	0.0327621	0.0298737	0.0154564	0.0156119	0	0.0643619	0.0759699	0.196566	0	0	0.0314613	0	2.38865	0	4.55856	0
gene10125	LOC109413530	serine/threonine-protein kinase MRCK beta-like	58.4313	0	0.0169901	0	0	0.0131775	0	0.297291	0	0.0939098	0.0416122	0.0671925	0.0350638	0.0107496	0.0131531	0.0490804	0	0.0379693	0.0332981	0	0	0.0152423	0.0408369	0	0	0	0	0	0	0	0	0.0159486	0	0	0	0	0	0	0	0.0182126	0	0	0.0320435	1.84959	0	2.12332	0.0196501
gene15353	LOC109419038	potassium/sodium hyperpolarization-activated cyclic nucleotide-gated channel 1-like	56.0677	0	0	0.037884	0	0	0.0399878	0.297291	0	0.0580263	0	0.096875	0.0168511	0.0309965	0	0.0707618	0	0	0	0.024728	0	0.0439511	0.0785023	0.0211839	0	0	0	0	0.0467522	0	0	0	0	0	0	0	0.0451721	0.0426553	0.0275918	0	0	0	0	1.15686	0	1.77233	0
gene6311	LOC109409380	potassium/sodium hyperpolarization-activated cyclic nucleotide-gated channel 2-like	60.0975	0.0219714	0	0	0.0133178	0	0	0.297291	0	0.113692	0.0734678	0.142357	0.0495252	0.136647	0	0.233964	0	0.0402217	0.0176367	0	0.0316872	0.0484394	0	0.0155647	0	0.0337307	0.0303094	0	0	0	0.0341251	0.0506841	0	0.015941	0	0.018024	0	0.0156704	0	0.0578792	0	0	0	1.68559	0	1.79266	0.0832631
gene2061	LOC109421125	uncharacterized LOC109421125	153.272	1.4654	0.738701	0.606927	0.34163	0.68036	1.80884	1.17915	2.44158	0.291645	0.603075	0.693836	0.0317607	0.262898	0.250194	0.333427	1.58486	2.83738	0.995324	2.47016	0.162569	0.0828383	0.14796	0.39927	1.2659	0.346107	0.855251	0.953429	0.264353	0.477436	0.744076	1.08347	1.38312	0.695168	0.536947	0	0.681117	0.602969	0.728064	0.593891	0.26672	1.20692	0.522448	3.4739	0.544305	5.46621	0.213588
gene30887	LOC109398839	erbin-like	59.2162	0	0	0	0	0	0	0.297291	0	0.0851249	0	0	0	0	0	0	0	0	0	0	0	0	0	0	0	0	0	0	0	0	0	0	0	0	0	0	0	0.056318	0	0	0	0	0	0.8802	0	1.84365	0
gene37842	LOC109621931	cilia- and flagella-associated protein 52-like	127.084	0.0200513	0.0164251	0.0698569	0.0182308	0.0127393	0.0402198	0.297291	0.0849739	0.324238	0.174323	0.136412	0.112992	0.0831368	0.114441	0.11862	1.58898	0.0550599	0.651863	0.215552	0.180737	0.103147	0.0789577	0.198863	0.184969	0.138523	0.0691513	0.0847984	0.156745	0.609928	1.39364	1.00989	0.506119	0.0872874	0.418786	0.312527	0.227171	1.13692	0.111007	0.017607	0.110704	0.0666273	0.154889	4.4965	0.330806	4.02824	0
gene27476	LOC109432004	protein Cep78 homolog	44.3121	0	0.117465	0.127167	0.0347677	0.0364422	0.0575267	0.297291	0.189061	0.0371009	0.0767186	0	0	0	0.0181873	0	2.51712	0.157506	1.082	0.332022	0.0206808	0	0.056467	0.0812673	0.25306	0.110073	0.138471	0.0808586	0.269032	0.220857	0.11136	0.0220528	0.254574	0.187272	0.252208	0.211742	0.0433232	0.327275	0.185238	0	0.0904802	0.084709	0.132924	1.0467	0.207727	0.927159	0.027171
gene15354	LOC109419054	potassium/sodium hyperpolarization-activated cyclic nucleotide-gated channel 2-like	72.3543	0.0232314	0	0	0.0140815	0	0	0.297291	0.043756	0.150265	0.0621448	0.180625	0.078548	0.144484	0.0294648	0.137434	0	0.0425284	0.0186481	0.0384214	0	0.0512172	0	0.0164573	0	0.0356651	0.0320475	0	0	0	0	0.0893179	0	0.0168552	0	0.0190576	0.0350934	0.0165691	0	0.0611984	0.0366461	0	0	1.69085	0	1.8597	0.044019
gene17721	LOC109421566	armadillo repeat-containing protein 4	58.8462	0.725286	0.115277	0.0754279	0.118108	0.281982	0.2002	0.297291	0.275252	0.140038	0.195464	0.0350692	0.0244007	0.00561044	0.137297	0.0320201	0.193708	0.0495424	0.156411	0.107419	0.00780603	0.0397762	0.0284182	0.0153373	0.0434174	0.0166189	0.0298664	0.0610407	0.0169245	0.0333453	0.0504396	0.0998869	0.0683103	0.0392702	0.142795	0.115444	0.0735862	0.0694862	0.0699185	0.123572	0	0.0239802	0.0167241	1.51899	0.13939	3.54125	0.174348
gene11978	LOC109622681	antho-RFamide neuropeptides-like	18.0037	0	0	0	0	0	0	0.297291	0	0	0	0	0	0	0	0	0	0	0	0	0	0	0	0	0	0	0	0	0.0332793	0.0327841	0	0	0	0	0	0	0	0.0151815	0	0	0	0	0	0	0	84.2061	0
gene16339	LOC109622873	tektin-4	180.742	0.152777	0.375445	0.15484	0.166688	0.543562	0.694615	0.297291	0.230202	0.474332	1.47126	0.93048	0.723178	0.680955	0.135639	0.686894	1.3539	0.0839039	0.367908	0.252671	0.198302	0.785914	0.581551	0.15152	0.857858	0.539453	0.46366	0.96916	0.191086	1.01181	1.96948	2.09108	2.39947	1.08628	1.63462	1.22822	1.47702	2.15747	0.845802	0.241476	0.361494	0.203062	0.259633	6.27104	1.13116	7.54964	0.289483
gene35411	LOC109403635	uncharacterized LOC109403635	93.0032	0	0	0.135501	0	0	0	0.297291	0	0.138363	0.0286112	0	0.0964351	0	0.0813928	0.101238	0.0729108	0	0.103026	0.0353781	0.123402	0.0314403	0	0	0.0343184	0.0328401	0	0	0	0.395357	0.232569	0.36187	0	0	0.0313526	0.105288	0	0.0610266	0.0394754	0	0	0	0	0.925739	0.172154	2.17342	0
gene1984	LOC109419879	IQ and ubiquitin-like domain-containing protein	38.2422	0.0436653	0.0447109	0.00691483	0.0132337	0.0346776	0.043793	0	0.0514018	0.0776697	0.094905	0.0353645	0.116879	0.0452615	0.0623041	0.122701	0.530207	0	0.0963893	0.036108	0.0236153	0.136378	0.121794	0.100532	0.227672	0.100553	0.0376474	0.092332	0.110936	0.260602	0.38996	0.310578	0.367389	0.0633614	0.407993	0.304472	0.255598	0.358143	0.0906522	0.0095856	0	0.0322429	0.0252975	1.00926	0.158135	0.96629	0.0206843
gene4677	LOC109407661	coiled-coil domain-containing protein 34-like	486.476	0	0	0	0	0	0	0	0	1.25772	1.19202	1.32985	0.273936	1.14774	1.64414	1.374	0	0	0.0867139	0	2.49272	1.23049	1.27615	0	0	0.124382	0	0.114213	0	0.332758	0.167782	0	0	0.0391884	0	0.0886178	0	0.0770461	0	0.0948575	0	0	0.0834465	5.87915	0	10.1027	0.0511721
gene7112	LOC109410253	uncharacterized LOC109410253	24.2047	0	0	0	0	0	0	0.297291	0.0280642	0	0	0	0	0	0.0944905	0.0352589	0.0253931	0.0272768	0	0.0492854	0	0	0	0.0211108	0.0956181	0.0686246	0.0205546	0.0210047	0.046591	0.0229489	0.0231423	0.0458293	0.0417888	0.0216212	0.0873548	0.0733388	0.0450163	0.0850164	0	0.0785028	0.0470081	0.0220049	0.0230197	0.136781	0.0719483	0.940455	0
gene22040	LOC109426159	CD63 antigen-like	28.3289	0.0701659	0	0	0	0	0	0.297291	0	0	0	0	0.0395397	0	0	0	0.0298944	0	0	0	0	0	0	0	0	0	0	0.0247281	0	0	0	0	0	0	0	0	0	0	0	0	0	0	0	0.276048	0	0.675101	0
gene22453	LOC109426650	uncharacterized LOC109426650	63.796	0	0	0	0	0	0.106023	0.297291	0	0	0	0	0	0	0	0	0	0	0.127286	0	0	0	0	0	0	0	0	0	0	0	0	0	0	0	0	0	0	0	0	0	0	0	0	0	0	80.3122	0
gene27568	LOC109432082	uncharacterized LOC109432082	25.0759	0.125248	0.102597	0.0595026	0.0569383	0.0397871	0.0837426	0.297291	0.235902	0	0	0	0	0	0.0397134	0.0185237	0.560303	0.0286604	0.0754034	0	0	0	0	0	0	0.0240352	0.086389	0	0.122386	0.289355	0.267478	0.433386	0.241497	0.0681537	0.367144	0.539413	0.354748	0.357315	0.433372	0	0.0246963	0.0231211	0.0967496	1.45772	0.0251993	1.25327	0.088995
gene16440	LOC109420160	potassium/sodium hyperpolarization-activated cyclic nucleotide-gated channel 1-like	51.0935	0	0	0	0	0	0	0.297291	0	0.07818	0.161663	0.411143	0	0.093965	0	0.0715041	0	0.0276583	0.0485113	0	0.174316	0	0.178483	0	0.0969554	0	0.0208421	0.0425968	0.118106	0	0	0.0232351	0	0.0876943	0	0	0	0.107757	0.0557625	0	0.0476655	0	0	1.12937	0	1.23271	0.0286278
gene6924	LOC109410055	uncharacterized LOC109410055	53.5133	0	0	0	0	0	0	0.297291	0	0.0481885	0.274027	0.530975	0.0419825	0.19306	0	0.176295	0.0634826	0.034096	0.149507	0	0.0805838	0.0547495	0.684527	0	0.209165	0	0.15416	0.0525116	0.0873581	0	0	0	0	0.054053	0	0.0916736	0	0.0265676	0.0687417	0	0.0293801	0	0	0.928158	0	2.1791	0.0705822
gene1733	LOC109417052	sperm flagellar protein 1-like	51.5686	0	0	0	0	0.06892	0	0	0.0681056	0.0233886	0	0	0	0	0	0	0	0	0	0	0	0	0	0	0	0	0.0249408	0	0	0.0278459	0	0	0.025353	0.0262349	0.0529977	0	0	0.180526	0	0	0	0	0	0.331937	0	0.946309	0.13703
gene12467	LOC109415917	girdin-like	43.7013	0	0.0130854	0.0556531	0.0193653	0.0355216	0.0587437	0.297291	0.0150437	0.115724	0.0480732	0.0414002	0.0315063	0.0124187	0.0151953	0.00945017	0.229087	0.241256	0.0384683	0.30382	0.0230381	0.0117393	0	0.0735561	0.0128139	0.0306549	0.0275455	0.0168891	0.0312185	0	0	0.00614164	0.033601	0	0	0.0327607	0.0361961	0.0512691	0.0294789	0.0070135	0.0062996	0.0235912	0	0.711526	0.0128558	0.986979	0.0378352
gene6925	LOC109410031	potassium/sodium hyperpolarization-activated cyclic nucleotide-gated channel 4-like	68.3547	0	0	0	0	0	0	0.297291	0	0.147102	0.110612	0.388473	0	0.0107153	0.0131111	0.0978477	0.0352344	0	0.0829798	0	0	0.0151936	0.162827	0	0	0.0158701	0.0142604	0.0291452	0.0969716	0.0318429	0	0.0158977	0	0.0300007	0	0.0169603	0	0	0	0	0	0	0	1.36921	0	1.83009	0.0195874
gene30517	LOC109398455	head peptide-like%2C transcript variant X1	157.138	0.111033	0	0	0	0	0	0.297291	0	0.359092	0.111382	0	0	0	0.0704126	0	0	0	0	0	0	0	0	0	0	0	0	0	0	0	0	0	0.155701	0	0	0.0910847	0	0	0.0512251	0	0	0.122982	0	0.0728049	0	141.615	0
gene14352	LOC109417993	cilia- and flagella-associated protein 52	128.876	0.113562	0	0.0503544	0.0344174	0.0288601	0.0683366	0.297291	0.117641	0.367271	0.18227	0.110369	0.153587	0.0706281	0.0864197	0.1478	1.1225	0.0831567	0.75661	0.169034	0.155591	0.133528	0.0596246	0.193077	0.17308	0.087171	0.125326	0.0480264	0.106529	0.620916	1.36695	1.03914	0.509592	0.0659148	0.574235	0.279478	0.257321	1.27161	0.188611	0.0797751	0.0895686	0.07547	0.122812	4.11037	0.173647	3.86358	0.0645535
gene8910	LOC109412139	uncharacterized LOC109412139	21.522	0.16133	0.0440514	0.0794831	0.0434616	0.0303699	0.0439461	0.297291	0.0450165	0.0502431	0.0319676	0.0542	0.0134685	0.0495487	0.0341028	0.0706966	0.112013	0.0328152	0.0335744	0.0444693	0.0129261	0.0175642	0.023529	0.101589	0.0958605	0.105491	0.0659415	0.0631737	0.0420382	0.0736225	0.22737	0.261889	0.184337	0.0173408	0.245214	0.14705	0.0722087	0.264219	0.0937257	0.0209871	0.10368	0.035297	0.11539	1.14012	0.254862	1.00263	0.0735916
gene19114	LOC109423115	IQ and ubiquitin-like domain-containing protein	44.3525	0.0665061	0.045399	0.0210638	0.0134374	0.077465	0.044467	0.297291	0.0521929	0.107543	0.0963657	0.0502723	0.131171	0.0574476	0.0773214	0.12459	0.566703	0	0.115668	0.0366638	0.0239788	0.154768	0.152767	0.117784	0.284524	0.102101	0.0382268	0.14063	0.181962	0.332901	0.516472	0.332405	0.497392	0.0643367	0.479257	0.381901	0.259532	0.44271	0.153412	0.00973314	0	0.0327392	0.0256868	1.18469	0.142728	1.07501	0.0210027
gene33955	LOC109621699	uncharacterized LOC109621699	42.427	0	0	0	0	0	0	0.297291	0	0.0898907	0.0654708	0.0400194	0	0	0.00979235	0.0274049	0	0	0	0	0	0	0	0	0	0	0	0	0	0	0	0	0	0.0112034	0	0	0	0	0	0	0	0	0	1.06313	0	2.04433	0
gene30516	LOC109398468	antho-RFamide neuropeptides-like	18.2472	0	0	0	0	0	0.0331131	0.297291	0	0	0	0	0	0	0	0	0	0	0	0	0	0	0	0	0	0	0	0	0	0.0381385	0	0	0	0	0	0	0	0.017661	0	0	0	0	0	0	0	78.3071	0
gene17764	LOC109421636	hypodermin-B	21.2927	0.0292952	0	0	0	0	0	0.297291	0	0	0	0	0	0	0.0371556	0	0	0	0	0	0	0	0	0	0	0	0	0	0	0.0451198	0.0227501	0	0	0	0	0	0	0	0	0.0514482	0	0	0	0.019209	0	23.7668	0
gene19990	LOC109423987	uncharacterized LOC109423987	194.635	0.0427474	0.0350168	0	0	0	0	0	0	0.580646	0.500284	0.304665	0.481778	0.276937	0.56928	0.467842	0.218552	0.136946	0.0171569	0.0706979	0.339076	0.486923	0.252495	0.105989	0	0.0820327	0.0589696	0.0150652	0	0.0987577	0.0829918	0.0657404	0.0149861	0.0155074	0	0.0350672	0.0161435	0.121953	0.0788858	0.131377	0.0168578	0.0315651	0.0330209	2.77493	0.0516035	6.74522	0
gene20354	LOC109623148	cingulin-like protein 1	102.241	0.63099	0.577689	0.32916	0.101242	0.424472	0.459116	0.423565	0.314592	0.456152	0.260635	0.084171	0.0418323	0.0288554	0.11769	0.164685	1.07534	0.084935	0.402223	0.153466	0.0267651	0	0.0608997	0.210353	0.208416	0.170947	0.166409	0.130809	0.0580303	1.04329	1.00885	1.08455	1.04098	0.0807892	1.37363	0.928679	0.855052	0.979484	0.633585	0.0651848	0.0731873	0.0685191	0.114687	2.10522	0.418196	2.78555	0.43956
gene16193	LOC109419964	cilia- and flagella-associated protein 57	101.1	0.160726	0.0708935	0.250609	0.0749403	0.267069	0.181862	0.293932	0.302724	0.335872	0.256314	0.0400528	0.111473	0.0768927	0.18817	0.168224	0.337121	0.0905325	0.0793947	0.112461	0.0356613	0.072686	0.0811415	0.613089	0.66447	0.616869	0.383745	0.392147	0.338268	0.152336	0.220829	0.247177	0.286065	0.242194	0.380537	0.334694	0.438893	0.282172	0.353641	0.0759946	0	0.0639054	0.0764031	2.33476	0.0795995	3.5306	0.0937058
gene12737	LOC109416213	stabilizer of axonemal microtubules 1-like%2C transcript variant X2	484.888	3.30077	0.86293	0.363302	0.383119	0.840326	1.17391	0.946129	1.60935	1.96844	1.2133	1.22858	1.22684	0.891755	1.52908	1.48183	2.40369	1.57491	4.726	1.81967	1.39266	0.430086	0.184365	0.439467	0.178394	0.296495	0.419815	0.387756	0.567295	1.93796	1.18167	1.40405	1.52647	0.772799	0.995017	2.4869	3.64236	1.05186	3.41282	0.585847	1.37554	1.08037	0.370706	9.02309	0.546353	20.8389	1.30853
gene28296	LOC109432895	testicular haploid expressed gene protein-like	308.231	5.89544	5.74293	1.19674	0.993397	3.54312	2.49596	3.83138	3.23687	0.338631	0.761124	0.191726	0.179578	0.247741	0.245393	0.309715	0.737045	0.583374	0.712592	1.56229	0.147725	0.167277	1.56858	0.1935	0.182589	0.0698898	0.0471006	0.0802197	0.0177937	0.245406	0.194444	0.157526	0.239396	0.231208	0.266896	0.485492	0.567348	0.487034	0.567074	0.639601	0.951511	0.655509	0.597826	5.32834	2.07001	12.2469	3.77389
gene28489	LOC109432946	uncharacterized LOC109432946	81.9224	0.167482	0.0685971	0.0636539	0.050759	0.0212815	0.12318	0	0.173498	0.238328	0.201609	0.108515	0.103817	0.164924	0.0531051	0.0693562	0.0713565	0.1533	0.282324	0.207744	0.0603858	0.110772	0.0439674	0.059323	0.094043	0.257121	0	0.0354148	0.0392773	0.0773857	0.221108	0.0772704	0.129173	0.0850601	0.159558	0.961743	1.46739	0.119451	1.63808	0.500024	0.0396289	0.123671	0.0129374	1.50452	0.336967	2.24311	0.111071
gene21766	LOC109425839	coiled-coil domain-containing protein 34-like	472.886	0	0	0	0	0	0	0.0795323	0	1.86629	1.11861	1.54434	0.683367	1.21366	1.77673	1.3606	0	0	0.134267	0	2.74401	1.35214	1.09777	0.0592465	0.0670869	0.0962958	0	0.0294743	0.0653777	0.225417	0.194843	0	0	0.212376	0	0.137215	0	0.149121	0.0771681	0.0734381	0	0.0308778	0	6.99191	0	12.9392	0.0396171
gene37544	LOC109405993	tubulin alpha-8 chain-like	132.479	0.365616	0.386956	0.53305	0.137961	0.637579	0.555735	1.21012	1.39656	0.448349	0.304425	0.703832	0.991096	0.53437	0.0984119	0.153009	0.428968	0.198862	0.703067	0.293783	0.0671424	0.0532201	0.0339493	0.0977685	0.531127	0.373245	0.520919	0.573598	0.509507	0.95605	0.731116	0.517089	0.384453	1.23101	0.515554	0.475269	0.429775	0.757499	0.267286	0.172606	0.212155	0.906486	1.42252	1.82481	2.03988	4.27628	0.238569
gene21003	LOC109425049	dynein heavy chain 3%2C axonemal-like	22.6836	0.0757088	0.0669134	0.0277645	0.0434749	0.031645	0.0879192	0.0719965	0.131339	0.114693	0.0506309	0.0400171	0.00449087	0.00103258	0.0303229	0.0306446	0.142605	0.0218835	0.0735665	0.0098851	0.00718337	0.00292827	0.0222287	0.0931517	0.0703193	0.0443505	0.0192389	0.0351073	0.0358213	0.00920564	0.221251	0.410573	0.578325	0.00433653	0.464297	0.323608	0.377707	0.321139	0.400755	0.0139957	0.00785696	0.0102981	0.0169291	1.95173	0.232493	1.12562	0.0566263
gene1777	LOC109417517	TBC1 domain family member 19-like%2C transcript variant X4	39.4292	0.921987	0.226575	0.0584023	0.0111771	0.164016	0.0616455	0.166588	0.225751	0.250471	0.0863221	0.149343	0.0883246	0.170399	0.192946	0.119996	2.33333	0.202539	0.695685	0.152483	0.0930783	0.142286	0.0786629	0.241663	0.391976	0.191085	0.190781	0.142969	0.237843	0.596409	1.65395	1.38246	1.15068	0.20068	1.02025	1.0563	1.21169	1.519	0.731615	0.0161919	0.0436313	0.0544644	0.0640983	2.30938	0.12614	3.00901	0.174699
gene37468	LOC109405883	histone H1	583.198	0.0384093	0	0.0973198	0	0	0	0.18263	0.0723432	2.40985	1.15589	0.597267	0.15151	0.159253	0.438436	0.159057	0.392746	0.10547	0.123326	0	0.276969	0.620981	0.504159	0.272095	2.86535	1.88692	0.821271	0.866325	2.34197	2.10008	0.536902	0.826965	0.134653	0.752417	0.84443	0.787714	0.38526	1.36971	0.283521	0.269817	0.151471	0	0.207689	10.1748	0.680045	12.7423	0
gene19584	LOC109423627	uncharacterized LOC109423627	184.737	0	0	0	0	0	0.0729883	0.155716	0.102804	0.600175	0.328517	0.0353645	0.492124	0.16973	0.20768	0.226028	0.372075	0.249798	0	0.0902701	0.196794	0.401112	0.286575	0	0	0	0	0.0769434	0.085335	0	0.127161	0	0.153079	0.0792018	0	0	0	0.155714	0.0503623	0	0.086099	0	0	1.10947	0	3.6551	0.103422
gene6295	LOC109409358	succinate dehydrogenase [ubiquinone] cytochrome b small subunit%2C mitochondrial-like	227.24	0	0	0	0	0	0	0	0	0.644985	0.444575	0.215361	0.468267	0.114846	0.281049	0.262182	0.0944101	0	0	0	0.079895	0	0.0727153	0	0.0888758	0.0425238	0	0	0.0866114	0	0	0	0	0	0	0	0.0836842	0	0	0	0	0	0	3.95939	0	4.47731	0
gene9550	LOC109412850	uncharacterized LOC109412850	29.841	0.0945229	0.0442451	0.0256605	0.0327395	0.0171582	0.054171	0	0.0254332	0.192152	0.0541825	0.0437451	0.022828	0.0279937	0.154138	0.159767	0.897486	0.111238	0.184267	0.145161	0.048686	0.00992334	0.0531731	0.220014	0.151644	0.331686	0.19559	0.285532	0.221671	0.218373	0.220214	0.186898	0.198823	0.107768	0.247392	0.144004	0.0713931	0.1252	0.137054	0.0237144	0.0639016	0.0398838	0.0417232	0.540102	0.141274	1.1641	0.0383791
gene1313	LOC109411655	toll-like receptor 7	437.151	2.85974	0.683249	0.34594	0.216675	0.706568	0.557686	0.717649	0.991222	1.83046	0.776941	1.02294	1.14149	0.869725	1.48608	1.23359	1.66684	1.17245	3.65852	1.61758	1.02392	0.321074	0.182471	0.302472	0.135407	0.205795	0.369841	0.279955	0.574402	1.47581	0.832804	0.962047	0.88419	0.655591	0.698571	2.01197	2.86494	1.01981	2.62951	0.566747	1.26873	0.88719	0.352834	8.29058	0.415542	16.9905	1.20414
gene17665	LOC109421523	dynein heavy chain 8%2C axonemal-like	43.858	0	0.00307413	0	0.00113737	0.00238429	0.0112913	0	0	0.149284	0.0778013	0.0607879	0.019033	0.0622398	0.0737761	0.0444022	0.00319779	0.00858755	0.00753106	0	0.0108246	0.046884	0.0135463	0.0199389	0.00150517	0.0302471	0.00388272	0.0119032	0.0117346	0.0173399	0.0160289	0.00865706	0.0105251	0.0013614	0.00825057	0.0092357	0.00992073	0.0240891	0.0138508	0	0	0.00554222	0	0.968297	0.00604039	1.58874	0
gene34224	LOC109402354	uncharacterized LOC109402354	26.0092	0	0	0	0	0.0167185	0	0.0125121	0	0.14042	0.0439949	0.0255744	0.0111215	0.0204572	0.0584062	0.0311345	0.033634	0.00602152	0.0422458	0.0272001	0.0332068	0	0	0	0	0.00504977	0.00453756	0	0	0	0	0.00505855	0.0138377	0.00954602	0.0241051	0	0.0298129	0.00938394	0.0303503	0	0	0.00971542	0	0.841154	0	1.07857	0
gene2346	LOC109423747	inducible metalloproteinase inhibitor protein	103.274	0	0	0	0	0	0	0	0	0.326681	0.168881	0	0.0474348	0.0436266	0.427048	0.896355	0	0.0770482	0	0	0.121399	0.12372	0.0552447	0	0.0675225	0.129228	0	0	0	0.129646	0.0653695	0	0.0590199	0	0.123375	0	0	0	0	0	0	0.124313	0	0	0	115.265	0.159498
gene19688	LOC109423766	radial spoke head protein 3 homolog B-like%2C transcript variant X2	31.6949	1.36699	1.13501	0.223839	0.293106	0.484467	0.572021	0.760521	0.849475	0.138343	0.0435326	0.0180755	0.151968	0.0289175	0.0235887	0.121029	0.499209	1.05546	0.738996	0.73822	0.0134114	0	0.0366185	0.652179	0.0895133	0.0285526	0.064141	0.0393272	0.0726939	0.143225	0.274421	0.793712	0.795456	0.0742162	0.994962	1.18242	1.70676	0.464266	2.06787	0.832895	1.40088	0.514999	0.3448	1.67682	0.681032	1.97556	1.03959
gene6117	LOC109409127	dynein heavy chain 8%2C axonemal-like	47.1366	0	0.00912467	0	0.00112531	0	0.0111717	0.00706195	0	0.181325	0.0695274	0.0577379	0.00836945	0.0712021	0.0800581	0.041735	0.0031639	0.00849654	0.00745125	0.00614082	0.0214198	0.0300152	0.0207133	0.0170973	0.00744609	0.0128256	0.026891	0.0143942	0.00870766	0.00285936	0.0129756	0.0028551	0.00260338	0.00942879	0.0108842	0.00913782	0.00981559	0.0450194	0.013704	0.0130416	0	0	0.00860458	1.18202	0.00298819	1.55761	0.00351774
gene25656	LOC109430005	cyclin-dependent kinase 20-like	36.9962	0.241175	0.115243	0.0763847	0	0.102151	0.174691	0.172012	0.283905	0.259994	0.0537625	0.156262	0.0792787	0.0729139	0.280395	0.30913	0.804901	0.202356	0.661445	0.299151	0.289852	0.236314	0.290185	0	0.0161217	0.0308545	0.0277248	0.0283319	0.0628436	1.6251	1.85731	1.20542	1.01459	0.102072	0.810064	0.725429	0.485758	1.43342	0.500695	0.388254	0.142664	0.029681	0.139724	1.25193	0.485233	0.959125	0.0190408
gene21122	LOC109425097	dynein regulatory complex subunit 3-like	27.8664	0	0	0.0190408	0	0	0	0	0.396315	0.0583291	0.040205	0.0194761	0.00846952	0.0155791	0.0285937	0.0177828	0.128069	0.178841	0.0120645	0.0372855	0	0	0.0591839	0.0212944	0.120562	0.0576844	0.0311	0.0105937	0	0.21991	0.385169	0.369823	0.221299	0.0327138	0.2313	0.345224	0.227039	0.343023	0.19415	0.0395927	0.237084	0.310747	0.185759	0.936229	0.0241913	0.740396	0
gene3977	LOC109402996	coiled-coil domain-containing protein 39-like	43.2513	0.183562	0.0781902	0.125577	0.00445058	0.0373195	0.112914	0.223438	0.103721	0.12823	0.0540137	0.014272	0.0331009	0	0.0232814	0.0260622	0.181441	0.09409	0.223968	0.0607169	0.00529466	0	0.00481886	0.228865	0.294491	0.214172	0.232964	0.150084	0.22385	0.141359	0.450459	0.626698	0.53026	0.111872	0.401732	0.138536	0.249559	0.450363	0.169372	0.303028	0.121614	0.0813264	0.0623899	1.70433	0.275718	2.06285	0.166951
gene29844	LOC109397675	uncharacterized LOC109397675	61.9785	0.0942774	0.19307	0.0398126	0.0857181	0	0.157588	0	0.192367	0.203268	0.084065	0.0814455	0.0973995	0.187304	0.0697512	0.00929553	0.120502	0.115059	0.113516	0.116941	0.0566528	0.0808301	0.0618741	0.0556558	0.0378126	0.144735	0.0433516	0.0553759	0.0368492	0.0726018	0.109821	0.0724937	0.121187	0.102602	0.0806047	0.837841	0.925699	0.112067	1.18886	0.193164	0.0619652	0.0696154	0.036413	1.28787	0.0885182	1.66905	0.104205
gene5046	LOC109408081	TPPP family protein CG45057-like	76.1812	0	0	0.0244386	0	0	0.0128979	0	0	0.224593	0.0774036	0.0499944	0.0434819	0	0.0244663	0	0.19725	0.0826341	0.0309692	0.0319035	0.166924	0.141762	0	0	0.0309478	0.0888443	0.127732	0	0.0603187	0.415948	0.269649	0.207664	0	0	0.0282733	0.0316492	0.01457	0.288923	0.106795	0	0	0	0	1.08779	0.34154	1.84118	0
gene14168	LOC109417608	uncharacterized LOC109417608	144.003	0	0	0	0	0	0	0.240537	0	0.28631	0.126866	0.0819421	0.17817	0.294958	0.160403	0.187044	0	0.0578801	0	0	0.0455986	0	0	0.0447961	0	0	0	0	0	0	0	0.0486238	0.0886738	0.0458791	0	0	0.0477612	0.0451002	0.233386	0.111053	0	0	0	1.40975	0	3.9912	0
gene22990	LOC109427211	nucleosome assembly protein 1-like 1	2339.99	0	0.0645031	0.199517	0.0477296	0.0500285	0.473842	0.149765	0.037078	3.46343	2.73834	2.67852	2.95083	3.67298	4.0448	3.72668	1.14066	0.540566	0.37925	0.293018	2.95266	3.12483	2.37724	1.03198	0.252658	0.543994	0.543129	0.333012	0.461665	0.363836	0.51978	0.211922	0.220843	0.25709	0.144265	0.258384	0.356849	1.26363	0.254297	0.103717	0.0931595	0.174435	0.27372	58.2154	0.316857	83.9152	0.0373009
gene16867	LOC109420677	ferritin heavy chain-like	74.1464	0	0	0	0	0	0	0	0.0406425	0.291645	0.0861536	0.083469	0.0362979	0	0.0612721	0.190529	0.109774	0.0719295	0.180968	0.0532649	0	0.0946724	0	0.114077	0.496543	0.671447	0.266572	0.227007	0.050353	0.0248019	0.150066	0.123825	0	0.327138	0.0523966	0	0	0.145631	0.0956884	0	0	0	0	1.35155	0.0259193	1.92123	0
gene32329	LOC109400321	dynein regulatory complex subunit 3-like	33.6038	0	0	0.0183802	0	0	0.0194009	0.0275938	0.737804	0.112611	0.0388101	0.0188004	0.00817567	0.0150386	0.0276016	0.0514973	0.173076	0.172636	0.0815217	0.083981	0	0	0.0571305	0.0205556	0.0931032	0.10023	0.010007	0.0102261	0.0226828	0.189935	0.70981	0.602424	0.193276	0.0105263	0.265804	0.309443	0.241078	0.455292	0.133867	0.0891778	0.160201	0.235687	0.224143	1.17011	0.046704	1.11673	0
gene26152	LOC109430648	radial spoke head protein 3 homolog A-like	34.8927	1.64656	1.54691	0.318201	0.417262	0.508282	0.609545	0.619251	0.972429	0.126359	0.0311059	0.0180819	0.110086	0.0289279	0.058993	0.0990589	0.594509	0.919602	0.903542	0.646174	0.0268323	0	0.0366316	0.639233	0.0746212	0.0285628	0.064164	0.0393413	0.087264	0.100293	0.317864	0.765384	0.756606	0.0877415	1.26801	1.59493	1.93221	0.54405	2.49779	0.996566	1.6215	0.528922	0.617989	2.04341	1.02566	2.33428	1.41013
gene17629	LOC109421504	carboxypeptidase B-like	44.7372	0	0	0	0	0	0	0	0	0.111057	0.0459296	0.0222492	0.0290263	0.00889867	0	0.0304721	0	0	0	0	0	0	0	0	0.0413184	0	0	0	0	0	0	0	0	0	0.0251651	0.0422548	0	0	0.0316849	0	0	0	0	0.0337747	0	42.0397	0
gene19043	LOC109423025	uncharacterized LOC109423025	63.4585	0.115228	0.0377558	0	0.0558755	0.0292833	0.0924519	0.153409	0	0.163969	0.0616477	0.0149317	0	0.023888	0.0438436	0.0409003	0.0785492	0	0.0554969	0	0.0166182	0.0338717	0	0.0326514	0.0924308	0.0176899	0	0	0.0360304	0	0.0536902	0.301252	0.210058	0.0501611	0.135109	0.132336	0.191469	0.213674	0.148849	0	0	0	0	1.34488	0.22256	1.31266	0.0436669
gene19478	LOC109423511	uncharacterized LOC109423511	36.7591	0.142952	0.276782	0.0823194	0.086649	0.0825658	0.130336	0.0370752	0.183578	0.092464	0.0260728	0.0336805	0.00732327	0.040412	0.0329651	0.0307521	0.90804	0.118952	0.208635	0.0752251	0	0	0.0341161	0.0184124	0.145943	0.079804	0.0448183	0.0457996	0.253973	0.340264	0.151382	0.319772	0.492039	0.0565727	0.685703	0.565022	0.638013	0.704421	0.57557	0	0.0204998	0.0287883	0.100387	1.66165	0.0627519	1.79054	0.0123121
gene24456	LOC109428850	serine/threonine-protein phosphatase rdgC%2C transcript variant X5	42.7019	3.08389	2.74778	1.34343	1.21339	1.9868	2.1994	1.17307	2.61889	0.132981	0.036182	0.0070109	0	0.123378	0.03431	0.0256054	1.30929	2.46618	3.02268	3.16755	0.0234083	0.0397596	0.0142032	0.0229963	0.0433993	0.0415299	0.0373174	0.0381345	0.0169174	0.124993	0.268899	0.615712	1.31253	0.0785076	1.42735	2.10375	2.3456	0.64055	2.67576	0.36106	1.19482	0.463425	0.35106	2.71744	0.461538	3.14832	0.820121
gene11824	LOC109415357	EF-hand calcium-binding domain-containing protein 1-like	60.1106	0	0	0	0	0	0	0	0	0.172375	0.0254602	0.0246669	0.0214536	0	0.0482859	0	0	0	0	0	0.0823587	0	0	0	0.0610776	0	0	0	0	0	0	0	0	0.138109	0	0.0312309	0	0	0	0.13372	0.0300272	0	0	0.898675	0	1.05494	0
gene6312	LOC109409362	potassium/sodium hyperpolarization-activated cyclic nucleotide-gated channel 1-like	44.834	0	0	0	0	0	0	0	0.0512938	0.0880757	0.0364252	0.123516	0.0460397	0	0	0.0966657	0	0	0	0.0225201	0	0.160108	0	0.0578773	0	0	0	0	0	0	0	0	0	0	0	0	0	0	0.0753848	0	0	0	0	1.05357	0	1.53024	0
gene32260	LOC109400245	uncharacterized LOC109400245	235.444	0	0	0	0	0	0	0.193626	0	1.27309	0.136165	0.0439742	0.535442	0.351754	0.387362	0.120453	0.520491	0.310613	0	0.112247	0.146823	0.399012	0.445429	0.192318	0.108884	0	0.0936257	0.0956756	0	0.104531	0.0527063	0	0.0951734	0.196968	0.0994748	0	0	0	0.18787	0	0	0	0	1.37958	0	5.27632	0.3858
gene9868	LOC109413212	dyslexia susceptibility 1 candidate gene 1 protein homolog	38.4923	0.535225	0.350746	0.149174	0.0648843	0.108815	0.300602	0.346107	0.181455	0.138477	0.0286349	0.0277426	0	0.0221916	0.04073	0.0253305	0.583768	0.0979803	0	0.177037	0	0	0	0.0151663	0.0343467	0	0.0295335	0	0	0.082434	0.382393	0.44448	0.54039	0.0310659	0.470677	0.316126	0.307234	0.580232	0.217294	0.0939959	0	0.0790431	0	1.3336	0.0861479	1.58198	0.243395
gene1479	LOC109414237	dynein light chain 1%2C axonemal-like	111.025	0.0617292	0	0	0	0	0	0.0587024	0	0.119783	0.0619229	0.0599933	0.0695711	0.0479893	0.176157	0.127814	0.1052	0	0.0247754	0	0.0445129	0.11341	0.0607692	0.284242	0.0742748	0.142151	0.17031	0.239303	0.0482549	0.118842	0.0719065	0	0.108203	0.246327	0	0.0253194	0	0.242145	0.142394	0	0	0	0.0238419	2.30713	0.0248393	2.11438	0
gene15726	LOC109419511	succinate dehydrogenase [ubiquinone] cytochrome b small subunit%2C mitochondrial-like	78.7628	0	0	0	0	0	0	0	0	0.279493	0.0577947	0.0559938	0.0730496	0.04479	0	0.0511254	0	0	0	0	0	0.0635094	0.0567179	0	0	0.0331686	0	0	0	0	0	0	0	0	0	0	0	0.0616369	0	0	0	0	0	0.934997	0	1.62974	0
gene27567	LOC109432129	uncharacterized LOC109432129	37.9779	0.133542	0.359431	0.10876	0.0346909	0.242412	0.191333	0.0907101	0.0898302	0.0863777	0.0255164	0.0741639	0.0107505	0.0197748	0.0483925	0.0902877	0.812802	0.017462	0.199078	0.0157757	0	0	0	0.108117	0.0918187	0.14644	0.0394758	0.0672334	0.208785	0.352592	0.088891	0.337397	0.48154	0.0415241	0.950683	0.579048	0.54755	0.489829	0.792123	0.0670075	0.0300935	0.028174	0.0294734	1.83885	0.0614128	1.98238	0
gene23123	LOC109427344	uncharacterized LOC109427344	93.7847	0	0	0	0	0	0	0	0	0.217082	0.0561113	0	0.0236407	0.0869708	0.0266041	0.0248182	0	0.191997	0	0	0	0.0924894	0	0	0	0	0	0	0	0	0.065158	0	0	0	0	0.0344147	0	0	0	0	0	0	0	1.89805	0	3.48745	0
gene2356	LOC109423773	EF-hand domain-containing protein 1-like	121.861	0.0375925	0.0615882	0.0396876	0.0379772	0.0955353	0.125675	0.202579	0.0826056	0.048631	0.0419005	0.0405948	0.00706135	0.0584499	0.00794652	0.0815437	0.363039	0.160576	0.37217	0.176155	0.00903598	0.0460435	0.0411198	0.0798925	0.0703618	0.0288562	0.0172861	0	0.0979559	0.115798	0.963387	0.722659	0.5623	0.0272747	0.449968	0.359782	0.198755	0.44686	0.127184	0.176053	0	0.0185058	0.0483982	3.97679	0.272284	4.07029	0.0118717
gene4383	LOC109407225	uncharacterized LOC109407225	86.4665	0.0872939	0	0	0	0	0	0.166027	0	0.225853	0	0.0373292	0	0.0452424	0	0	0	0	0.0700718	0	0	0	0	0.309199	0.21007	0	0	0	0	0.134448	0.0677906	0.111425	0	0.316674	0	0.143221	0.131866	0.498076	0.402729	0.203896	0	0	0	2.63299	0.983536	1.58976	0
gene34022	LOC109402139	histone-lysine N-methyltransferase%2C H3 lysine-79 specific-like%2C transcript variant X1	22.6361	0	0.0341441	0.0264031	0	0	0	0	0.0785075	0.067402	0	0	0	0	0	0	0	0	0	0	0	0	0	0	0	0	0	0	0.0325837	0.0160494	0	0.0320511	0.0146126	0	0	0	0.0472237	0.0594568	0.01923	0	0.0821886	0.0923355	0	0.0136656	0.0167725	101.932	0.0987244
gene17871	LOC109421774	uncharacterized LOC109421774	36.5521	0	0	0	0	0	0.111693	0.0953158	0	0	0	0	0	0.0346314	0.0211873	0	0	0	0.0268187	0	0	0.0491052	1.16213	0.0473361	0	0.0769374	0.046089	0.164843	0.0261174	0	0.0259456	0	0	0	0	0	0	0.0238287	0	0	0	0	0	0.6134	0	0.822927	0
gene22289	LOC109426443	myb-like protein X%2C transcript variant X1	30.078	0	0.0325731	0.0503764	0.0241027	0.101054	0.079761	0.0756289	0.187238	0.0385804	0	0	0.0224079	0	0	0.023524	0	0.036397	0.0319192	0.0328821	0.028674	0	0	0	0	0	0	0	0.0310845	0.0459329	0	0.0611526	0.0139403	0	0	0.03262	0.0450508	0	0.0183452	0	0.141132	0.0293623	0.0307165	0.0912574	0.0480023	165.614	0.131855
gene19709	LOC109423780	uncharacterized LOC109423780	114.463	0	0	0	0.0890367	0	0	0	0	0	0	0	0	0	0	0	0	0	0	0	0	0	0	0.104059	0	0	0	0	0	0	0	0	0.025748	0	0	0	0	0.157148	0	0	0.231711	0	0	1.12691	0	1.80904	0.0695825
gene12816	LOC109416307	uncharacterized LOC109416307	276.225	0	0	0	0	0	0.0520953	0	0	0.856749	1.00305	0.504827	1.1306	0.888396	0.889389	1.0832	0.132784	0.0891466	0.109451	0.0322151	0.814677	0.873194	0.703115	0.275979	0.1875	0.134568	0.0806124	0.0411887	0.0913617	0.0600015	0.0453805	0.0898682	0.0409725	0.0989279	0.0285495	0	0.102986	0.0833557	0	0.0855214	0.0460898	0.0575334	0.0601868	3.64011	0.0156762	8.1863	0
gene26792	LOC109431302	protein Cep78 homolog	105.008	0.0671956	0.0335766	0.0354702	0.020365	0.00711528	0.044928	0.0639007	0.112429	0.43217	0.479334	0.181405	0.0694208	0.371476	0.459222	0.397519	1.84179	0.0717563	0.512417	0.138915	0.331107	0.181063	0.556105	0.142806	0.143737	0.120352	0.21629	0.142088	0.236376	0.129366	0.12176	0.0947272	0.125637	0.0650036	0.20518	0.174556	0.177635	0.141059	0.113669	0.0196681	0.0353322	0.0826965	0.0778594	2.93985	0.0721037	3.48829	0.0106102
gene32854	LOC109400912	protein hemingway-like%2C transcript variant X1	134.114	0.371171	0.699307	0.728854	1.14741	0.40089	0.545976	0.317674	0.489366	0.672225	0.496447	0.192391	0.250994	0.904136	0.376609	0.889297	0.711624	0.101922	0.268149	0.107426	0.240886	0.736472	0.414118	0.381264	0.327511	0.199439	0.0256013	0.104647	0.145076	0.886085	1.31151	0.998929	0.715674	0.242368	0.992825	0.639418	0.462569	0.661813	0.462346	0.13037	0.0585498	0.123334	0.086015	2.5433	0.537681	4.82829	0.0527472
gene6182	LOC109409175	armadillo repeat-containing protein 4-like	61.5067	0.715587	0.081163	0.062762	0.120115	0.258794	0.159435	0.2722	0.383603	0.213626	0.198784	0.0784626	0.0372227	0.00570573	0.139629	0.0716407	0.290807	0.0503839	0.123719	0.145659	0.00793861	0.0566326	0.0578017	0.0155978	0.0264929	0	0.0303737	0.0465581	0	0.0339117	0.0341976	0.101583	0.0849084	0.071887	0.14522	0.171591	0.0914663	0.117777	0.030474	0.145005	0	0.0243876	0.0170082	1.7036	0.141758	3.90646	0.19817
gene18852	LOC109422819	protein hemingway-like%2C transcript variant X1	168.263	0.267972	0.603654	0.622394	1.12347	0.48238	0.716681	0.382248	1.13562	0.751093	0.627229	0.202561	0.478189	0.76386	0.368196	0.779431	0.551823	0.12264	0.215104	0.0553983	0.128823	0.902588	0.791413	0.30057	0.286607	0.11999	0.154027	0.0944395	0.139653	1.0662	1.33532	1.23633	0.704578	0.226827	0.834611	0.659481	0.354198	1.27415	0.473909	0.235306	0.105677	0.181384	0.1035	4.12918	0.467261	6.05039	0.169251
gene36869	LOC109405256	uncharacterized LOC109405256	116.84	0	0	0	0	0.206328	0.144758	0.154416	0.101945	0.350096	0.506759	0.140277	0.579517	0.589096	0.480541	0.320201	0	0	0.0868949	0	0.0780603	0.397762	0.497318	0	0	0	0	0	0	0	0	0	0.151801	0.0785404	0.0793306	0	0	0.231621	0	0.0950556	0	0	0	1.34864	0	2.54137	0
gene1458	LOC109414012	ferritin%2C heavy subunit-like	132.17	0	0	0	0	0	0	0	0	0.369142	0.109047	0.158473	0.0459432	0	0.0258512	0.289389	0.0694716	0	0.130889	0.0674187	0	0.0599145	0.0535075	0.14439	1.07909	1.31423	0.224937	0.287328	0.0637329	0.0941769	0.126628	0.219419	0	0.532371	0.0597474	0.267525	0	0.058148	0.0376134	0.0715906	0	0	0	1.65723	0.0328066	2.60432	0
gene34065	LOC109402163	sperm-associated antigen 1-like	45.9011	0.463722	0.224463	0.267036	0.0255528	0.0669588	0.112746	0.440984	0.297754	0.381747	0.394695	0.040971	0.023756	0.0218488	0.147036	0.349149	0.37718	0.212227	0.101519	0.087151	0.0607982	0.154901	0.15217	0.418097	0.625599	0.388315	0.479775	0.401138	0.329546	0.633053	1.12946	1.55596	0.99019	0.244689	1.94631	1.08935	0.955224	1.63864	1.20583	0.592281	0.199498	0.108951	0.179105	1.39593	0.508903	1.37907	0.299544
gene2541	LOC109425928	uncharacterized LOC109425928	110.297	0.0113067	0	0	0	0	0.0604788	0	0	0.526564	0.506617	0.109887	0.178403	0.24026	0.236618	0.301	0.0385381	0.0724448	0.0544562	0.0467491	0.293518	0.116328	0.051944	0.128156	0.0544185	0.0347163	0.0467925	0.0717254	0.053032	0.0261215	0	0.0434709	0.023783	0.0492205	0.0662876	0.0742024	0.204959	0.0887055	0.062596	0.0198568	0	0.208725	0.192149	2.22415	0	2.95032	0
gene36278	LOC109404601	uncharacterized LOC109404601	33.6281	0.335653	0.369763	0.102642	0.0631406	0.117656	0.294071	0.110067	0.217999	0.0823507	0.085144	0.0299967	0.0130446	0.00599866	0.0440393	0.0273886	3.17572	0.349606	1.01269	0.497694	0	0.0170114	0.0531731	0.204982	0.269246	0.186573	0.0878159	0.130529	0.126669	0.0980449	0.377509	0.703092	1.16048	0.00839751	0.924538	1.86097	2.40405	0.544826	2.19998	0.365879	0.310379	0.0854653	0.0178814	1.03973	0.251498	1.36307	0.175447
gene21887	LOC109425876	uncharacterized LOC109425876	80.3686	0	0.0436092	0.134889	0	0.0338232	0.0355949	0.0506263	0.150406	0.37878	0.178012	0.0689862	0.0599997	0.110365	0.101281	0.314941	0	0	0	0	0.191945	0.27386	0.0349392	0.150853	0.0427042	0	0.0367197	0	0.0832323	0.0409969	0	0	0.0746535	0	0.234082	0.21836	0	0.0759387	0	0.046747	0.0419887	0	0	2.05954	0	3.31917	0
gene27214	LOC109431734	coiled-coil domain-containing protein 175-like	25.0667	0.0272908	0.0670663	0.164227	0	0.121372	0.1551	0.207621	0.269859	0.0882611	0.273764	0.0176822	0.123031	0.0282884	0.0692267	0.0484346	0.267429	0.0624496	0.142393	0.0902701	0.0196794	0.0200556	0.0358219	0.0773322	0.0547288	0.136166	0.0470593	0.105797	0.138669	1.27149	3.30618	3.66713	1.93262	0.158404	2.54996	0.873118	0.422561	3.27	0.314765	0	0.0538119	0.0604555	0.0737843	4.91209	0.977361	0.672202	0.0775662
gene5860	LOC109622202	carboxypeptidase B-like	38.7622	0.207576	0.204045	0.184082	0.163567	0.685779	1.16583	0.631674	1.62251	0.362513	0.0971728	0.0268985	0.116973	0.0215164	0.171127	0.0491197	0.0884386	0.0379997	0.0999744	0.017165	0.0598733	0	0.0771073	0.0882293	0.333017	0.207137	0.0715873	0	0.0649066	0.143867	0.177319	0.494803	0.819107	0.0602416	0.806231	1.54957	1.55214	0.577383	1.35986	0.109363	0.0163719	0.107294	0	0.612488	0.150348	1.08647	0.23599
gene33590	LOC109401704	uncharacterized LOC109401704	82.7536	0.396096	0.324464	0.250903	0.0218264	0.205898	0.433368	0.479403	0.915594	0.20962	0.288973	0.0233307	0	0.111975	0.114176	0.085209	0.981865	0.428473	0.433569	0.684861	0.0259659	0	0	0.0765267	0.0866539	0.165843	0.0496737	0.101522	0.140744	0.194109	0.0559273	0.359951	0.126237	0.0783768	0.34305	0	0.326368	0.282502	0.465152	0.0632384	0.0568014	0.0797676	0.166893	1.95972	0.0869376	2.77167	0.136459
gene13449	LOC109416961	uncharacterized LOC109416961	28.3522	0.0381094	0.00975547	0	0.0144373	0.0378316	0.0318507	0.0792766	0.0560768	0.107843	0.0637149	0.00771618	0.0306023	0.0370335	0.0377615	0.0140906	0	0.0218014	0.0382385	0	0.0515262	0.0875187	0	0.00843657	0	0	0.0164286	0.0167883	0	0.0275133	0	0.0274723	0.0101871	0	0.0785471	0.0293086	0.01799	0.0169877	0.0439543	0.0627445	0	0.0351754	0	1.06982	0	1.43918	0.0112828
gene21060	LOC109425089	transformer-2 protein homolog beta-like%2C transcript variant X2	79.8737	0	0	0	0	0.034898	0.0367261	0.0522352	0	0.248702	0.330605	0.0355893	0.247626	0.0854046	0.1045	0.292455	0.117013	0.17597	0.0881836	0.0454219	0.0198045	0.26238	0.0720991	0.0389119	0.110153	0	0.132603	0.0193581	0.214694	0.190349	0.298595	0.211184	0.0192565	0.338747	0.241521	0.247829	0.207438	0.235056	0.329436	0.192931	0.108308	0.1014	0.106076	1.83686	0.0663083	2.00828	0.104079
gene32226	LOC109400218	M protein%2C serotype 49-like	21.8876	0.0644932	0.03522	0	0	0.0682914	0.0287475	0.0204436	0	0.0278103	0.0143768	0	0.0121144	0	0	0.0254355	0.860964	0	0.483182	0.0888853	0.015502	0.0157984	0.0564358	0.076146	0	0	0	0.0757631	0	0.595985	1.55261	1.1406	0.633069	0	0.614417	0.299801	0.129898	1.2266	0.0198359	0.0377542	0	0.0158742	0.0332125	0.817576	0.17301	0.810815	0.061101
gene25745	LOC109430129	coiled-coil domain-containing protein 40-like	104.154	0.302641	0.0525871	0.0929478	0.15009	0.302985	0.0981095	0.0697701	0.07773	0.332189	0.527451	0.0237681	0.00516799	0.0285186	0.034895	0.0108508	0.0547024	0	0.0736163	0.0151674	0.00661317	0	0	0.00649678	0.205983	0.0774363	0.0506049	0.0646411	0.0788602	0.819243	2.57103	3.75162	2.37274	0.0665385	2.64127	0.872699	0.623413	3.2966	0.651575	0.00805299	0.0723329	0.0474035	0.240864	3.98088	0.819249	3.04952	0.460495
gene29084	LOC109433588	coiled-coil domain-containing protein 40-like	103.826	0.277718	0.0660466	0.113495	0.200917	0.284587	0.119798	0.0681548	0.0759304	0.417212	0.551186	0.0232179	0.00504835	0.0278583	0.0454495	0.0211992	0.0839708	0	0.0862944	0.0148163	0.00646007	0	0	0.00634637	0.229959	0.0481368	0.0247167	0.11366	0.0910408	0.745085	2.58804	3.74743	2.41831	0.116996	2.67203	0.955382	0.636046	3.14361	0.553829	0.00786655	0.0706583	0.0330757	0.221447	3.98271	0.785863	3.03408	0.33101
gene5643	LOC109408642	carboxypeptidase B-like	25.6973	0.0453257	0.148515	0.200977	0.178579	0.57594	0.66672	0.387929	1.08847	0.278516	0.0757798	0	0.0766255	0.0234912	0.129346	0.026814	0.0193112	0	0.0727669	0.0187405	0.0326843	0	0.0743679	0	0.181791	0.121773	0.0156316	0	0.0354319	0.0872618	0.123196	0.226543	0.540259	0.0328854	0.514851	0.948148	1.06127	0.307107	1.19192	0	0.0178746	0.0836723	0	0.520103	0.0182386	0.802426	0
gene33876	LOC109402050	ran-binding protein 9	59.5273	0.0914507	0	0	0	0	0	0	0	8.07425	0.0611584	0	0	0.0947936	0	0	0	0	0	0	0	0	0	0	0	0	0	0	0	0	0	0	0	0	0	0	0	0	0.0843813	0	0	0	0.0706425	0	0.0735979	17.4923	0.173281
gene11977	LOC109622697	uncharacterized LOC109622697	98.2656	0	0	0	0	0	0	0	0	0.186329	0.0481622	0	0	0.07465	0	0	0	0.131838	0	0	0	0	0	0	0.115539	0	0	0	0	0.221839	0.111855	0.110754	0	0	0	0	0	0.205456	0.0664503	0	0	0.0531784	0	0	0	113.195	0
gene32277	LOC109400229	ankyrin repeat domain-containing protein 12-like	22.2032	0.120977	0.121968	0.0707368	0.0535866	0.0325181	0.0902202	0.0398232	0.122693	0.204654	0.0653458	0.0391916	0.0524405	0.0578765	0.091472	0.126621	0.531285	0.383305	1.19146	0.353984	0.0570392	0.0786459	0.0519134	0.0626277	0.0597184	0.0607177	0.0160468	0.00983886	0.0509223	0.0143327	0.0975616	0.221826	0.169645	0.0270071	0.115935	0.374065	0.463898	0.195796	0.613938	0.081715	0.337628	0.0481011	0.0179712	1.06784	0.232166	4.77533	0.405557
gene24372	LOC109428754	dynein regulatory complex protein 1 homolog	49.4947	0.0801962	0.0563084	0.0145141	0.0208329	0.00727878	0.0229802	0.0762639	0.118681	0.340876	0.482687	0.118767	0.116208	0.124691	0.174367	0.332101	0.205007	0.0209729	0.174731	0.0663164	0.18175	0.210482	0.240606	0.267826	0.21137	0.123118	0.15014	0.0888266	0.161205	0.432307	0.329187	0.519757	0.273114	0.141307	0.528935	0.21616	0.181716	0.62917	0.126852	0.03018	0.018072	0.0338387	0.0176997	1.89306	0.129081	1.83422	0.05427
gene12670	LOC109416141	uncharacterized LOC109416141	45.4422	0.117668	0.080324	0.111804	0.0356618	0.0996785	0.1049	0.0745991	0.184689	0.329811	0.459035	0.152479	0.088411	0.223611	0.161677	0.290046	0	0.0897535	0.0629692	0.0973032	0.212127	0.0576484	0.154451	0.152822	0.613525	0.240861	0.162322	0.0967612	0.199298	0.0755125	0.380745	0.36192	0.151255	0.22766	0.517389	0.386111	0.148125	0.34968	0.271431	0.258311	0.0618715	0.0289625	0.0908948	0.887289	0.205178	0.890623	0.130059
gene12728	LOC109416212	uncharacterized LOC109416212	39.3577	0.101209	0.0414528	0.0320548	0.0306734	0.107169	0.0676697	0.064164	0.158854	0.218212	0.282017	0.109292	0.0760438	0.139878	0.149759	0.169642	0.143734	0.108078	0.0270805	0.139487	0.158127	0.0247922	0.132846	0.107546	0.338271	0.155376	0.0698081	0.0356683	0.0659306	0.0909294	0.248889	0.285352	0.224713	0.122384	0.445015	0.3321	0.114664	0.228582	0.140077	0.103683	0.0266084	0.0249112	0.0521201	0.674689	0.122176	0.636203	0.0799044
gene20536	LOC109424536	dynein regulatory complex protein 1 homolog	56.5941	0.146159	0.0920974	0.0142435	0.0204445	0.00714305	0.0225517	0.0962251	0.0741157	0.392697	0.503761	0.203967	0.10137	0.157328	0.142596	0.379117	0.239505	0.0205818	0.171472	0.0464856	0.0972876	0.272655	0.23612	0.278762	0.26154	0.138082	0.100812	0.103019	0.210932	0.424245	0.462746	0.458194	0.378382	0.179458	0.552029	0.212129	0.263246	0.713662	0.145234	0.0296173	0.0443376	0.0166038	0.086848	2.08629	0.199059	2.16349	0.0319548
gene28919	LOC109621435	uncharacterized LOC109621435	421.512	0.591924	0.290927	0.104985	0.129164	0.225642	0.284954	0.270192	0.312166	2.48098	1.2984	1.54942	0.707147	0.638104	0.690687	1.4147	3.0263	0.43344	0.741225	0.45032	0.631718	0.922191	0.808036	1.72762	3.01983	2.34452	1.76376	1.03469	1.38816	1.02107	2.35354	2.42142	1.87592	0.773031	2.16891	1.28192	0.89416	2.09397	1.24526	0.436605	0.186744	0.26225	0.109738	8.97348	0.933686	13.4133	0.471064
gene1256	LOC109411846	katanin p60 ATPase-containing subunit A-like 2	38.2013	0.0698351	0.0858087	0.0110591	0.0529124	0.0554609	0.140079	0.298849	0.164416	0.225853	0.128433	0.101807	0.05903	0.0542909	0.155003	0.154925	0.565316	0.0958821	0.294302	0.144371	0.025179	0.0256604	0.068749	0.234991	0.266089	0.321634	0.108379	0.147669	0.232014	0.873911	0.65079	0.496716	0.379476	0.278673	0.396626	0.186187	0.0923062	0.697306	0.128873	0.352602	0.247861	0.502778	0.161836	1.43097	0.309111	0.792864	0.0661619
gene22281	LOC109426276	serine protease inhibitor dipetalogastin-like	44.2213	0	0	0	0	0	0	0	0	0.113155	0.140392	0.0906782	0.039433	0.0544008	0.11094	0.0827942	0	0	0	0	0.05046	0	0.0229627	0.024786	0	0	0.0482659	0	0	0	0	0	0	0	0	0	0	0	0	0	0	0	0	0	0	26.3387	0
gene21543	LOC109425549	katanin p60 ATPase-containing subunit A-like 2	23.4993	0.0357111	0.0877589	0	0.010823	0	0.0596926	0.11886	0.0840766	0.0923945	0.107469	0.0578448	0.0201239	0.0370165	0.101909	0.0316893	0.334727	0.130748	0.0716644	0	0	0.0262435	0.0468743	0.0885433	0.0429689	0.123354	0.0123158	0	0.0697902	0.536264	0.305058	0.453085	0.275426	0.077729	0.300959	0.190418	0.0269726	0.458456	0.0329506	0.109753	0.070415	0.487835	0.275856	1.04201	0.344876	0.618471	0.0676656
gene5325	LOC109408298	protein D2-like	38.1336	0.847264	0.115674	0.0715587	0.0342374	0.143546	0.0755326	0.0268573	0.239371	0.0730702	0.0755486	0.0548958	0.0318299	0.380568	0.322379	0.50123	0.168457	0.103402	0.0453406	0.0934167	0	0	0.0185353	0	0.0453092	0.0650364	0	0	0	0.0217489	0	0.043433	0.0594056	0	0.0206968	0.11584	0.0426625	0.0402855	0.208472	0	0.0445501	0.271106	0.0436322	0.203703	0.0909151	3.34774	0.88297
gene23569	LOC109427876	cilia- and flagella-associated protein 53-like	192.106	0.0660963	0.108286	0.010467	0.0801274	0	0	0.0628554	0.0311228	1.89179	1.09401	0.417544	0.148986	0.282614	0.408676	0.615851	0.380168	0.181498	0.29181	0.136642	0.202564	0.400728	0.856734	0.374586	0.516941	0.469306	0.341922	0.279527	0.465019	0.343575	0.28231	0.432005	0.370746	0.383642	0.557033	0.393104	0.411861	0.589263	0.304934	0.62392	0.234591	0.15862	0.08935	3.75971	0.252667	5.02397	0.187859
gene23873	LOC109428304	cilia- and flagella-associated protein 53-like	151.691	0	0.0540055	0.0104404	0.0399618	0	0	0.0313478	0	1.52451	0.914868	0.33105	0.111455	0.213557	0.324019	0.477777	0.294934	0.150864	0.238146	0.136295	0.178278	0.35126	0.703115	0.326929	0.489184	0.392203	0.295579	0.209112	0.438068	0.24116	0.230393	0.354864	0.323577	0.310916	0.458988	0.256896	0.311222	0.493722	0.121664	0.448659	0.129997	0.158217	0.0636591	2.99363	0.172438	3.81866	0.156151
gene4848	LOC109407779	sodium/potassium/calcium exchanger 6%2C mitochondrial-like	25.8744	0.0866134	0.1419	0.192025	0.14875	0.376028	0.308859	0.672659	0.0271891	0.205418	0.164116	0.0561185	0.0162694	0.0673346	0.0183089	0.00853988	0	0.277476	0.127464	0.214869	0	0.0106085	0	0.0204526	0.0926367	0.0332424	0.0298706	0.0101749	0.0225691	0.0222333	0	0.0222002	0.0101214	0.020947	0.0105789	0.0710521	0	0	0.0665983	0.0887309	0.125241	0.479672	0.323378	1.09799	0.13941	0.766683	0.0683815
gene16003	LOC109419761	protein tilB	41.0363	0.670507	0.488222	0.188767	0.158053	0.236665	0.348687	0.0354239	0.385883	0.361414	0.0249115	0.0724057	0.0209913	0.038612	0	0.154258	0.349155	0.136384	0.538224	0.123213	0.0268613	0.0273747	0.0244474	0.71249	0.657374	0.629059	0.411092	0.525116	0.495029	0.315547	0.318207	0.458293	0.861894	0.675662	0.655161	0.763946	0.365758	0.66419	0.481192	0.457933	0.264421	0	0.143873	1.12356	0.149892	1.06088	0.211747
gene15198	LOC109418909	sodium/potassium/calcium exchanger 6%2C mitochondrial-like	39.2328	0.135033	0.165919	0.188177	0.163698	0.506167	0.406283	0.629217	0.0254332	0.174683	0.117395	0.288718	0.0152187	0.0629859	0.0342528	0.0399417	0.0230125	0.284276	0.14091	0.17866	0	0.00992334	0	0.0765267	0.216635	0.0932865	0.0838243	0.0285532	0.0422231	0.0831896	0.0629182	0.0830657	0.0284033	0.0587826	0.00989567	0.0886178	0.040796	0.0192615	0.0622972	0.0830003	0.0958524	0.468635	0.229478	1.44322	0.217344	1.54867	0.012793
gene31904	LOC109621560	uncharacterized LOC109621560	35.0835	0.360923	0	0.0762075	0.0729233	0	0.0804396	0.343225	0	0.752492	0.509291	0.0779496	0	0.311763	0	0.498206	0	0.22024	0	0.0994856	0	0.0884121	0.0789577	0	0	0	0.0829815	0.0847984	0	0.308516	0.0934284	0.215547	0	0	0	0.328647	0.181736	0.0283158	0.222015	0	0	0	0	0.841714	0.516058	0	0.11398
gene4442	LOC109407317	hypodermin-B	17.6736	0.030042	0	0	0	0	0	0	0	0	0	0	0	0	0.0381028	0	0	0	0	0	0	0	0	0	0	0	0	0	0	0	0.02333	0	0	0	0	0	0	0	0	0	0	0	0	0.0196987	0	20.8116	0
gene35268	LOC109621795	uncharacterized LOC109621795	26.6472	0	0	0	0	0	0	0	0	0.110508	0.0285641	0	0	0	0	0.0505358	0	0	0	0	0	0	0.0840958	0	0.239833	0.0655721	0	0	0	0.0657842	0	0.0985293	0	0.139451	0.125204	0	0	0.030463	0	0.0375054	0	0	0.0659873	0.308071	0	0.361641	0
gene6674	LOC109409803	general odorant-binding protein 67-like	22.4862	0	0	0	0	0	0.023649	0.23545	0.111254	0	0.260194	0	0	0.036663	0	0	0	0.485624	0.42588	0.526473	0.0255054	0	0	0	0	0	0	0.0249305	0	0	0	0	0	0	0	0.116061	0.21372	0	0.424267	1.30445	3.09657	1.30588	1.69398	0.0927691	0	0.272251	0
gene2341	LOC109423764	uncharacterized LOC109423764	36.8823	0	0	0	0	0	0	0	0	0.111797	0.0385298	0	0	0.02986	0	0.272669	0	0.10547	0	0	0	0	0	0	0	0	0	0	0	0	0	0	0	0.041801	0.126665	0	0	0	0	0	0	0	0	0	0	39.2468	0
gene25887	LOC109430276	uncharacterized LOC109430276	31.7022	0	0	0.0309863	0	0	0.0654141	0	0.0921353	0.0316408	0	0	0	0	0	0	0	0	0	0.0809024	0	0	0	0	0.196197	0.150197	0	0.0689587	0.0764795	0.226025	0	0.0752293	0	0.141966	0.0358484	0	0.0369474	0	0.180544	0.0429544	0	0.0361212	0.226723	0.192452	0	0.489486	0
gene17767	LOC109421637	trypsin 3A1-like	20.1185	0	0	0	0	0	0	0	0	0	0	0	0	0	0	0	0	0	0	0	0	0	0	0	0	0	0	0	0	0	0	0	0	0	0	0	0	0	0	0	0	0	0	0	0	20.6737	0
gene4445	LOC109407318	trypsin 3A1-like	20.7812	0	0	0	0	0	0	0	0	0	0	0	0	0	0	0	0	0	0	0	0	0	0	0	0	0	0	0	0	0	0	0	0	0	0	0	0	0	0	0	0	0	0	0	0	20.7924	0
gene11811	LOC109415356	inducible metalloproteinase inhibitor protein-like%2C transcript variant X1	19.7751	0	0	0	0	0	0	0	0	0.0186536	0.0192863	0	0	0.0149466	0	0.0341215	0	0	0	0	0	0	0	0	0	0	0	0	0	0	0	0	0	0.0209237	0.0634027	0	0	0	0	0	0	0	0	0	0	20.3924	0
gene16702	LOC109420456	uncharacterized LOC109420456	24.3984	0	0	0	0	0	0	0	0	0	0.0237512	0	0	0	0	0	0	0.032508	0	0	0	0	0	0	0	0	0	0	0	0	0	0	0	0.0515354	0	0	0	0.0253302	0	0	0	0	0	0.605477	0	0.90212	0
gene30613	LOC109398557	dynein heavy chain 10%2C axonemal-like	20.6982	0.0434519	0.0197744	0.0137621	0.0117058	0.0168706	0.0403509	0.0160694	0.0386471	0.140527	0.0565032	0.043794	0.00544131	0.0300268	0.0260245	0.0371302	0.158387	0.015467	0.0910738	0.0119772	0.00348146	0.00532202	0.0031686	0.0684037	0.0116184	0.0166769	0.0216455	0.0119105	0.00566119	0.0427567	0.0824849	0.230171	0.167564	0.00350287	0.18752	0.0950537	0.0692849	0.142901	0.0467751	0.00635916	0.00571188	0	0.00932363	0.925974	0.0777096	0.867732	0.0114351
gene9497	LOC109412820	general odorant-binding protein 67-like	37.0214	0.169453	0	0	0	0	0.141624	0.443146	0.0263308	0.109605	0.424961	0	0	0.0439117	0	0.100246	0.144392	0.891845	0.510082	0.630563	0.0916443	0	0	0	0	0	0	0.0298596	0	0	0	0	0	0	0	0.625537	0.51195	0	0.899034	2.23194	3.4415	2.06457	1.7671	0.277777	0	0.391294	0.08027
gene11826	LOC109415353	U1 small nuclear ribonucleoprotein A-like	40.1365	0	0	0	0	0.0191062	0	0	0	0.0589441	0.18283	0	0	0.0944604	0	0	0	0	0.0731505	0	0.153112	0	0.059808	0	0.0730999	0	0	0	0.0178094	0.0933361	0	0	0.063895	0.0330588	0.0220383	0	0	0.0649949	0	0	0.0237188	0	0	0.936341	0	0.695829	0
gene12610	LOC109416104	coiled-coil domain-containing protein 103-like	77.2656	0.223502	0.0610278	0.0471917	0.045158	0.331331	0.298875	0.850173	0.561284	0.674639	0.49823	0.096541	0	0.0772241	0.141736	0.176295	0.253931	0.136384	0.0598027	0.431247	0	0	0.0977895	0.105554	0	0.0571872	0	0	0	0.229489	0.231423	0.458293	0.52236	0.108106	0.436774	0.611157	0.731515	0.212541	0.687417	0.196257	0.0587601	0.0550122	0	0.781606	0.179871	2.46583	0.282329
gene7858	LOC109411050	ankyrin repeat domain-containing protein 12-like%2C transcript variant X2	26.7754	0.201057	0.12764	0.0636786	0.0517942	0.0606758	0.0806579	0.100379	0.179876	0.22108	0.0840365	0.0879313	0.0793094	0.067732	0.0860637	0.145704	0.595344	0.400268	1.06114	0.374084	0.0398701	0.0849583	0.0956662	0.074776	0.0685436	0.119607	0.0208017	0.0248	0.0078585	0.0774157	0.128813	0.200981	0.222028	0.0218811	0.232063	0.437076	0.584654	0.190001	0.774524	0.154479	0.459874	0.0965006	0.0427101	1.25242	0.186078	6.62231	0.623828
gene10855	LOC109414291	EF-hand calcium-binding domain-containing protein 2	113.95	2.54255	0.473351	0.439241	0.37361	0.979012	0.643935	1.09903	1.05209	0.946872	0.798649	0.274561	0.412464	0.279521	0.366449	0.592538	0.984783	0.246829	0.494772	0.222993	0.250013	0.792688	0.758486	0	0.247215	0.147854	0.0531427	0	0.0903436	0.622995	1.85482	1.36262	2.43095	0.0838504	2.90783	2.62298	2.41503	2.30795	1.91946	0.947166	0.334225	0.170677	0.178548	3.99107	0.775075	4.65541	2.15334
gene11486	LOC109414980	cilia- and flagella-associated protein 45-like	85.8154	0.0494148	0	0.0277538	0.00998411	0.0418599	0.0330395	0.125311	0.0620479	0.64628	1.03546	0.291779	0.380563	0.210519	0.275137	0.545684	0.603529	0.256305	0.251217	0.217933	0.308819	0.338932	0.486463	0.233372	0.246551	0.0505747	0.0795283	0.201316	0.0687587	0.380537	0.592758	0.793631	0.550425	0.155359	1.13467	0.310782	0.261261	1.0768	0.212776	0.106163	0.0259829	0	0.0254475	2.66404	0.20759	1.96948	0.0624209
gene9614	LOC109412957	irregular chiasm C-roughest protein-like	20.2009	0.759856	0.62244	0.26954	0.141244	0.231726	0.304831	0.211962	0.477058	0.43251	0.359099	0.288831	0.0628015	0.042007	0.186322	0.29968	0.189927	0.157649	0.260243	0.125669	0.124198	0.171245	0.119686	0.172252	0.154413	0.155538	0.104821	0.114257	0.0554394	0.0390104	0.0393392	0.0779045	0.213108	0.073507	0.311835	0.540226	0.732014	0.0722589	0.654376	0.0266891	0.143835	0.0673302	0.046957	0.996479	0.154918	1.09957	0.249562
gene19667	LOC109423676	EF-hand calcium-binding domain-containing protein 2-like%2C transcript variant X1	137.334	2.23678	0.582995	0.214676	0.287594	0.839743	0.611814	1.28915	1.11706	0.833	0.657273	0.241542	0.515644	0.281035	0.451331	0.400984	0.72196	0.279186	0.380861	0.140125	0.268823	0.896603	0.622785	0.0960335	0.163113	0.130073	0	0	0.0794787	0.443678	1.94758	1.58965	2.37622	0.0737664	2.881	2.50215	2.12459	2.32045	1.8137	0.654703	0.240571	0.150151	0.157076	4.37776	1.2819	4.66944	1.76594
gene24970	LOC109429449	transformer-2 protein homolog alpha-like	57.4386	0	0	0	0	0	0	0	0	0.203268	0.157622	0.0509034	0.110681	0.0610772	0.0996446	0.255627	0.0669453	0.0719116	0.189194	0.0649671	0.0566528	0.0288679	0.0257809	0.222623	0.0315105	0.120613	0.0812842	0.0830639	0.0921231	0.181505	0.274552	0	0.165256	0.0570013	0.0575748	0.128899	0	0.0560335	0.0724912	0.0689873	0	0	0.0606884	1.28787	0.0316137	1.57229	0
gene27516	LOC109432061	ADP-ribosylation factor-like protein 2-binding protein	64.513	0.267676	0.281916	0.0726669	0.139071	0.267243	0.0767023	0.618194	0.396127	0.939889	0.869478	0.148656	0.129291	0.0792743	0.290997	0.61079	0.944936	0.245009	0.429732	0.0632423	0.496339	0.393421	0.476832	0.406336	0.674827	0.645759	0.527508	0.18867	0.328817	1.94354	1.12844	1.85244	0.831153	0.360672	1.14895	0.72149	0.548761	1.36365	0.564534	0.134312	0.21112	0	0.265847	2.25663	0.369292	1.82488	0.18114
gene30880	LOC109398843	uncharacterized LOC109398843	44.4432	0	0.0608529	0.0470565	0.0225143	0.0471973	0	0.0353224	0.0349797	0.480504	2.13625	0.43319	0.104656	0.0385014	0.0471099	0.109868	0.0316504	0.0339983	0.089447	0	0	0.0272963	0	0	0	0	0	0.0261806	0	0	0	0.0285613	0	0	0.0816605	0.0304703	0	0.0794745	0.0685447	0.0326158	0.0585917	0.137136	0.0573844	0.51146	0.0298926	1.05784	0.14076
gene8725	LOC109411989	uncharacterized LOC109411989	62.8144	0.0468547	0.0358226	0.0501256	0	0	0.0891102	0	0.147083	0.153553	0.185918	0.078931	0.117349	0.0539638	0.0660295	0.205118	0.0443614	0.0476523	0.0275813	0	0	0.204301	0.216622	0.0125393	0	0.0383636	0.0236997	0	0.148951	0.0400914	0.0671127	0.0160127	0.0474529	0.0151088	0.019076	0	0.137625	0.0185653	0	0	0.0410613	0.0153769	0	0.865017	0.0837952	2.17753	0
gene35554	LOC109403774	speckle-type POZ protein-like	23.5721	0	0	0	0	0	0	0	0	0.0466146	0.0602446	0.0700408	0.0507642	0.0186755	0.0457022	0.0746097	0.0307046	0.0329824	0.0289247	0.0148986	0.0649598	0.0264806	0.0591222	0.0382899	0	0.0414895	0.0248541	0.0126991	0.0140841	0	0.0279831	0	0	0.0130719	0.0528136	0	0	0.0128499	0	0	0	0.0133038	0	0.153578	0	0.887549	0
gene19548	LOC109423553	trichohyalin-like	28.0264	0.0163367	0	0	0	0.0726548	0.0655377	0.0621424	0.0307698	0.0951017	0.830321	0.0105848	0.04603	0.0169338	0	0.0193291	1.51734	0.0598131	0.603227	0.0675461	0.0471215	0.0480222	0.0107217	0.150449	0.104836	0.0752406	0.0112681	0.0345445	0.0127707	0.830324	2.80376	1.54512	0.916351	0	0.658464	0.482456	0.13573	1.74774	0.12059	0.143452	0.0515401	0.0120632	0.0630975	1.27473	0.131475	1.19459	0.0154774
gene32658	LOC109400695	dynein assembly factor 3%2C axonemal homolog	31.497	0.235036	0.0296202	0	0	0.06892	0.0362651	0.0859659	0.0681056	0.140331	0.725456	0.187427	0.336212	0.0187406	0.91723	0.449219	0.831915	0.182036	0.275743	0.194358	0	0.26573	0.296642	0.128078	0.246547	0.0693903	0.0872926	0.063717	0.056533	0.153152	0.491411	0.639501	0.608473	0.157409	0.596224	0.266966	0.546223	0.541579	0.48378	0.0317515	0.0427793	0.0267005	0	1.22106	0.0873013	1.22464	0.068515
gene24895	LOC109429363	uncharacterized LOC109429363	31.8468	0	0	0	0	0	0	0	0	0	0	0	0	0	0	0	0	0	0	0	0	0	0	0	0	0	0	0	0	0	0	0	0	0	0	0	0	0	0	0	0	0	0	0	0	7.85397	0
gene2635	LOC109427348	uncharacterized LOC109427348	28.2293	0.163058	0	0	0.0131782	0.0745896	0.0363411	0.0692615	0.0849692	0.201798	0	0	0	0.00957773	0.00758301	0.096463	0	0.01393	0.0218148	0	0.0109743	0	0	0.038504	0.13167	0.125164	0.0374896	0.0574656	0.101973	0.0309737	0.154486	0	0.0129572	0.0394349	0.0398316	0.245232	0.0303789	0.17677	0.200605	0.0639543	0	0	0.0419857	0.183899	0.061239	0.876055	0.440788
gene10	LOC109427622	uncharacterized LOC109427622	25.0418	0	0	0	0	0.050356	0.015962	0	0	0.267449	0.100901	0.0822892	0	0	0	0	0.040685	0	0.11498	0	0	0.210528	0	0.0561478	0.312528	0.219902	0.235799	0.0673077	0.0746485	0.0676548	0.160922	0.0976595	0.0890494	0.196072	0.139961	0.143355	0.0959271	0.068107	0.154194	0.083852	0.062513	0	0	0.239815	0	0.404265	0
gene36461	LOC109404772	uncharacterized LOC109404772	28.1923	0	0	0	0	0	0	0	0	0.117065	0	0.0586322	0.0509945	0	0	0.107069	0	0	0	0	0.195764	0.066502	0.0593905	0.0641061	0	0	0	0	0	0	0.0702751	0.0347919	0	0	0	0	0.0683494	0.0322706	0	0	0	0	0	0.504361	0	1.28861	0
gene32227	LOC109400237	protein chibby homolog 1-like	36.9997	0.104122	0.127938	0.0329773	0.0631124	0.463065	0.174043	0.841637	0.0980556	0.16837	0	0	0.0293372	0	0.0660295	0.0307984	0.798505	0.524175	0.835796	0.387454	0	0.153035	0	0	0.167044	0	0	0	0	1.04238	1.73846	1.6413	1.5696	0	1.79314	1.40934	0.904394	3.23037	0.720545	0.320001	0.0821226	0	0	0.989956	0.293283	0.641156	0.246613
gene19550	LOC109423569	uncharacterized LOC109423569	33.2144	0.30773	0.0315099	0.0243661	0.046632	0.391024	0.128596	0.768183	0.144901	0.124404	0.0514493	0	0.0216764	0	0	0.0682684	0.524438	0.457716	0.988075	0.349897	0	0	0	0	0.061712	0	0	0	0	0.710938	1.8222	0.916927	1.75308	0	1.26852	1.35688	0.784446	2.00274	0.958304	0.911983	0.0606781	0	0.0594278	1.05934	0.154785	0.296083	0.255101
gene26516	LOC109430989	uncharacterized protein C1orf194-like	48.3486	0.470609	0.175228	0.108401	0.129662	0.190269	0.314657	0.650958	0.443192	0.11069	0.200279	0.083159	0.265197	0	0.162786	0.0506192	0.692652	0.469917	0.343421	0.0353781	0.277655	0.157201	0	0.454614	0.686367	0.689643	0.413127	0.331707	0.468216	0.428303	0.764155	0.625049	0.959901	0.558726	0.940578	0.772115	0.581647	0.671293	0.671082	0.826481	0.0674869	0.221138	0.0660962	2.10395	0.585322	3.49065	0.567453
gene19866	LOC109423948	uncharacterized protein C1orf194-like	31.5728	0.364792	0.170755	0.280589	0.110558	0.21521	0.505233	0.396463	0.220847	0.151685	0.104553	0.0844127	0.102783	0	0.231336	0.0308294	0.155421	0.357751	0.501982	0.237016	0.0939469	0.0957428	0.0684035	0.313798	0.29262	0.380022	0.647006	0.697903	0.692543	0.300988	0.60705	0.941689	0.986551	1.02087	0.821092	0.555754	0.728179	0.873447	0.480846	0.457604	0.452128	0.44253	0.201278	2.16984	0.733945	2.02568	0.197488
gene24763	LOC109429176	uncharacterized LOC109429176	33.497	0	0.0445234	0.0344292	0	0.0345322	0	0.0258438	0.0767794	0.351564	1.58118	0.264122	0.229716	0	0.0344682	0.0643087	0.0231572	0.0248751	0.0218148	0	0	0.0199715	0	0	0	0	0.0374896	0.0191552	0	0	0	0	0	0	0.0597474	0.0222938	0	0.058148	0.100302	0.0238635	0.042869	0.0802693	0.0839713	0.48113	0	0.836729	0.051494
gene20731	LOC109424761	progestin and adipoQ receptor family member 4-like	23.122	0.314961	0.692532	0.430519	0.170815	0.16851	0.254922	0.0630563	0.109278	0.0965003	0.0554297	0.042962	0.0373655	0	0.0315371	0.02942	0.918144	1.12281	0.638711	0.822473	0	0	0	0	0	0	0	0	0.0129585	0	0.0257466	0.0637333	0.127851	0	0.0485925	0.20398	0.300493	0.106406	0.3365	0.0873369	0.156894	0.0856839	0.0256102	0.858693	0.0133408	0.93145	0.06282
gene16175	LOC109419951	TBC1 domain family member 19-like%2C transcript variant X2	29.1059	0.409136	0.176393	0.0682007	0.0261046	0.123129	0.0575905	0.0921491	0.0811158	0.208924	0.086404	0.10464	0.0910087	0.0837022	0.0614502	0.0636945	1.66974	0.15768	0.587695	0.0534198	0.0310555	0.0870353	0.0777281	0.129663	0.164095	0.132233	0.103968	0.0758889	0.109415	0.530645	0.911373	0.943803	0.754905	0.0781164	0.828474	0.83024	0.748153	0.998272	0.447049	0	0.0169838	0.0477016	0.0998031	1.55315	0.112643	1.89781	0.132606
gene21367	LOC109425436	cilia- and flagella-associated protein 58-like	60.0633	0.076204	0.0277435	0	0.0153968	0.0215178	0.198144	0.0161039	0.0159476	0.240974	0.23216	0.235898	0.224254	0.368618	0.10202	0.195352	0.29581	0.0155002	0.12234	0.0140034	0.268648	0.423119	0.361202	0.0839744	0.0611275	0.0974908	0.0642416	0.0298401	0.0860457	0.0456429	0.0591784	0.227874	0.374011	0.0430023	0.304044	0.375077	0.345341	0.16305	0.476567	0.0148699	0	0.0250088	0	1.89875	0.115841	1.72709	0.0962611
gene16887	LOC109420695	dynein light chain 1%2C axonemal-like	44.6063	0.0414489	0	0	0	0	0	0	0	0.241289	0.166316	0.0671388	0.105107	0.096669	0.0657128	0.232946	0.105957	0	0.0499073	0	0.0298888	0.0761503	0.0680071	0.32299	0.199491	0.127265	0.0857675	0.160683	0.0972042	0.111717	0.112659	0	0.101716	0.195472	0	0.017001	0.0313063	0.133029	0.0191224	0	0	0	0.0160089	1.1143	0.0166787	1.03688	0
gene27646	LOC109432224	cilia- and flagella-associated protein 58-like	62.8411	0.0579636	0.0271321	0	0.0150575	0.0210436	0.171631	0.015749	0.0467886	0.235664	0.215969	0.241429	0.237977	0.369077	0.0997719	0.200844	0.35985	0.0151586	0.0797624	0.0136948	0.262727	0.450306	0.407587	0.0821238	0.0597804	0.108055	0.0742487	0.0525284	0.0970955	0.044637	0.0707352	0.324728	0.30771	0.0420546	0.34589	0.380397	0.400273	0.218515	0.389661	0.0145422	0	0.0244577	0	1.83519	0.113288	1.82925	0.0941397
gene20115	LOC109424190	uncharacterized LOC109424190	77.4577	0.163264	0	0.0827341	0.356259	0.207454	0.633132	0.18631	0.0922513	1.05602	0.633267	0.677003	0.276006	0.524618	0.103535	0.482923	0.0834709	0.0298877	0.0524215	0	0.329642	0.35994	0.257159	0.138789	0.209541	0.100258	0.0675662	0	0.102101	0.150873	0	0.050216	0	0.118454	0	0	0	0.139731	0.0602572	0	0	0.0482222	0.0504462	1.07053	0	2.63902	0.0309353
gene8337	LOC109622360	tubulin alpha-8 chain-like	110.073	0.388135	0.478158	0.476714	0.0859077	0.514545	0.726556	1.64623	1.68118	0.582778	0.365589	0.688717	0.901354	0.732765	0.134818	0.263512	0.523272	0.250188	0.606706	0.187017	0.0584004	0.037198	0.0863725	0.167385	0.373549	0.373	0.509732	0.661177	0.546048	0.997886	0.668245	0.55269	0.390393	1.36616	0.474806	0.431843	0.38996	0.755671	0.242864	0.293351	0.223568	1.24583	1.73605	1.43381	2.20789	3.98964	0.233446
gene20241	LOC109424326	prostatic acid phosphatase	12.2642	0	0	0	0.0115382	0	0	0	0	0.0369375	0.0381903	0	0.0214536	0.0197313	0	0.0225222	0.0162202	0	0.03056	0	0	0.0139888	0.0374788	0.0809093	0.0916164	0.102282	0.0525184	0.0268341	0	0.131931	0.0147825	0	0.0533865	0.0552436	0	0	0	0.0271528	0	0	0	0	0	0.0249632	0	34.5347	0
gene2037	LOC109420209	uncharacterized LOC109420209	52.6452	0.124347	0	0	0.250987	0.89509	0	0.0201024	0.0386438	0.187401	0.665263	0.161133	0.385394	0.064446	0	0.244961	0.105957	0.113817	0	0	0	0	0	0.0880883	0.299236	0.398023	0.171535	0.212102	0.0972042	0.418462	0.19313	0.812729	0.119444	0.270654	0.546753	0.408024	0.03475	0.339668	0.688406	0.327566	0.294223	0.367275	0	1.08685	0.400288	0.366578	0.0388761
gene23242	LOC109427508	uncharacterized LOC109427508	49.8937	0	0	0	0	4.05964	0	1.37277	0	0.65958	0.218564	0.174341	0.195233	0.149632	0	0.204957	0	0.0528526	0.0927008	0.334241	0.0832759	0.127302	0.227377	0.108808	1.2895	1.10808	0.364819	0.88155	0.0902765	0.896447	0.851988	0.355203	0.51255	1.48054	0.592418	0.59968	0.595749	0.411828	0.586065	0.30422	0.030058	0.127912	0.178416	0.706501	1.11528	0.666681	0.292126
gene17522	LOC109421338	M protein%2C serotype 2.1-like	109.357	21.0929	1.9705	0.423266	0.499531	0.891519	2.26364	2.0334	1.69904	0.806785	1.13206	0.961996	1.31791	0.704172	0.60737	0.250356	0.265711	0.570845	0.685487	0.626229	1.10823	0.278263	0.160798	0.142008	0	0.102583	0.0768149	0.204092	0.104469	0.0857625	0	0.0342539	0.0780847	0.0808008	0.065291	0.21926	0.723394	0.111201	0.534343	0.410723	0.281079	0.328939	0.344109	2.48281	0.215103	9.5151	1.92027
